# Supplementary material for: Dentists’ intention to report suspected violence: a cross-sectional study in eight Arab countries
Source: PubMed Central journal article supplement — BMJ Open. 2018 Mar 30;8(3):e019786. doi: 10.1136/bmjopen-2017-019786 (PMC5884375; doi:10.1136/bmjopen-2017-019786), 2018-03-30
Supplement: bmjopen-2017-019786.draft_revisions.pdf [file bmjopen-2017-019786.draft_revisions.pdf]

# BMJ Open

BMJ Open is committed to open peer review. As part of this commitment we make the peer review history of every article we publish publicly available.

When an article is published we post the peer reviewers' comments and the authors' responses online. We also post the versions of the paper that were used during peer review. These are the versions that the peer review comments apply to.

The versions of the paper that follow are the versions that were submitted during the peer review process. They are not the versions of record or the final published versions. They should not be cited or distributed as the published version of this manuscript.

BMJ Open is an open access journal and the full, final, typeset and author-corrected version of record of the manuscript is available on our site with no access controls, subscription charges or pay-per-view fees (<http://bmjopen.bmj.com>).

If you have any questions on BMJ Open's open peer review process please email [editorial.bmjopen@bmj.com](mailto:editorial.bmjopen@bmj.com)

# BMJ Open

## Dentists' intention to report suspected violence: a cross sectional study in eight Arab countries

|                                 |                                                                                                                                                                                                                                                                                                                                                                                                                                                                                                                                                                                                                                                                                                                                                                                                                                                                                                                                                                                                                                                                                                                                                                                                                                                                                                                                                                                                                                                                                                                                                                                                                                                                                                                                               |
|---------------------------------|-----------------------------------------------------------------------------------------------------------------------------------------------------------------------------------------------------------------------------------------------------------------------------------------------------------------------------------------------------------------------------------------------------------------------------------------------------------------------------------------------------------------------------------------------------------------------------------------------------------------------------------------------------------------------------------------------------------------------------------------------------------------------------------------------------------------------------------------------------------------------------------------------------------------------------------------------------------------------------------------------------------------------------------------------------------------------------------------------------------------------------------------------------------------------------------------------------------------------------------------------------------------------------------------------------------------------------------------------------------------------------------------------------------------------------------------------------------------------------------------------------------------------------------------------------------------------------------------------------------------------------------------------------------------------------------------------------------------------------------------------|
| Journal:                        | <i>BMJ Open</i>                                                                                                                                                                                                                                                                                                                                                                                                                                                                                                                                                                                                                                                                                                                                                                                                                                                                                                                                                                                                                                                                                                                                                                                                                                                                                                                                                                                                                                                                                                                                                                                                                                                                                                                               |
| Manuscript ID                   | bmjopen-2017-019786                                                                                                                                                                                                                                                                                                                                                                                                                                                                                                                                                                                                                                                                                                                                                                                                                                                                                                                                                                                                                                                                                                                                                                                                                                                                                                                                                                                                                                                                                                                                                                                                                                                                                                                           |
| Article Type:                   | Research                                                                                                                                                                                                                                                                                                                                                                                                                                                                                                                                                                                                                                                                                                                                                                                                                                                                                                                                                                                                                                                                                                                                                                                                                                                                                                                                                                                                                                                                                                                                                                                                                                                                                                                                      |
| Date Submitted by the Author:   | 25-Sep-2017                                                                                                                                                                                                                                                                                                                                                                                                                                                                                                                                                                                                                                                                                                                                                                                                                                                                                                                                                                                                                                                                                                                                                                                                                                                                                                                                                                                                                                                                                                                                                                                                                                                                                                                                   |
| Complete List of Authors:       | <p>El Tantawi, Maha; University of Dammam, Department of Preventive Dental Sciences<br/> Gaffar, Balgis; University of Dammam, Department of Preventive Dental Sciences<br/> Arheiam, Arheiam; University of Benghazi, Department of Community and Preventive Dentistry<br/> AbdelAziz, Wafaa; Alexandria University, Department of Pediatric Dentistry and Dental Public Health<br/> Al-Batayneh, Ola; Jordan University of Science and Technology, Department of Preventive Dentistry<br/> Alhowiti, Mansor ; Benghazi Psychiatric Hospital<br/> Al-Maweri, Sadeq ; Al-Farabi College<br/> Dama, Mai; Arab American University, Department of Paedodontics and Orthodontics<br/> Zaghez, Mounir ; Universite Badji Mokhtar Annaba, Department of Oral Medicine<br/> Hassan, Khalid ; Al-Azhar University - Assiut Branch, Department of Oral Medicine and Periodontology<br/> Al-Sane, Mona ; Kuwait University, Department of Developmental and Preventive Sciences<br/> AbdelSalam, Maha ; University of Dammam, Department of Biomedical Dental Sciences<br/> Sabbah, Wael; King's College London,<br/> Owais, Arwa ; University of Iowa , Department of Pediatric Dentistry<br/> Abdelgawad , Fatma ; Cairo University, Department of Pediatric Dentistry and Dental Public Health<br/> Aldhelai, Thiyezen ; Ibb University, Department of Orthodontic and Pediatric Dentistry<br/> El Meligy, Omar ; King Abdulaziz University, Department of Pediatric Dentistry; Alexandria University, Department of Pediatric Dentistry and Dental Public Health<br/> AlHumaid, Jehan ; University of Dammam, Department of Preventive Dental Sciences<br/> Al-Harbi, Fahad ; University of Dammam, Department of Substitutive Dental Sciences</p> |
| <b>Primary Subject Heading</b>: | Dentistry and oral medicine                                                                                                                                                                                                                                                                                                                                                                                                                                                                                                                                                                                                                                                                                                                                                                                                                                                                                                                                                                                                                                                                                                                                                                                                                                                                                                                                                                                                                                                                                                                                                                                                                                                                                                                   |
| Secondary Subject Heading:      | Ethics, Global health, Public health                                                                                                                                                                                                                                                                                                                                                                                                                                                                                                                                                                                                                                                                                                                                                                                                                                                                                                                                                                                                                                                                                                                                                                                                                                                                                                                                                                                                                                                                                                                                                                                                                                                                                                          |
| Keywords:                       | International health services < HEALTH SERVICES ADMINISTRATION &                                                                                                                                                                                                                                                                                                                                                                                                                                                                                                                                                                                                                                                                                                                                                                                                                                                                                                                                                                                                                                                                                                                                                                                                                                                                                                                                                                                                                                                                                                                                                                                                                                                                              |

1  
2  
3  
4  
5  
6  
7  
8  
9  
10  
11  
12  
13  
14  
15  
16  
17  
18  
19  
20  
21  
22  
23  
24  
25  
26  
27  
28  
29  
30  
31  
32  
33  
34  
35  
36  
37  
38  
39  
40  
41  
42  
43  
44  
45  
46  
47  
48  
49  
50  
51  
52  
53  
54  
55  
56  
57  
58  
59  
60

|  |                                                                                                                                                               |
|--|---------------------------------------------------------------------------------------------------------------------------------------------------------------|
|  | MANAGEMENT, ETHICS (see Medical Ethics), Human resource management < HEALTH SERVICES ADMINISTRATION & MANAGEMENT, MEDICAL ETHICS, PRIMARY CARE, PUBLIC HEALTH |
|  |                                                                                                                                                               |

SCHOLARONE™  
Manuscripts

For peer review only

1  
2  
3 **1 Dentists' intention to report suspected violence: a cross sectional study in eight Arab**  
4  
5 **2 countries**

6  
7 Maha El Tantawi, Department of Preventive Dental Sciences, College of Dentistry, University of Dammam,  
8 Dammam, Saudi Arabia; Balgis Gaffar, Department of Preventive Dental Sciences, College of Dentistry,  
9 University of Dammam, Dammam, Saudi Arabia; Arheiam Arheiam, Department of Community and Preventive  
10 Dentistry, Faculty of Dentistry, University of Benghazi, Benghazi, Libya; Wafaa AbdelAziz, Department of  
11 Pediatric Dentistry and Dental Public Health, Faculty of Dentistry, Alexandria University, Alexandria, Egypt;  
12 Ola B. Al-Batayneh, Department of Preventive Dentistry, Jordan University of Science and Technology, Irbid,  
13 Jordan; Mansor Alhowiti, Benghazi Psychiatric Hospital, Benghazi, Libya; Sadeq Al-Maweri, Alfarabi colleges,  
14 Riyadh, Saudi Arabia; Mai A. Dama, Department of Paedodontics and Orthodontics, College of Dentistry, The  
15 Arab American University, Jenin, Palestine; Mounir Zaghez, Department of Oral Medicine, Faculty of Medicine,  
16 Annaba University (BADJI Mokhtar), Annaba, Algeria; Khalid Saddiq Hassan, Department of Oral Medicine  
17 and Periodontology, Faculty of Dentistry, AlAzhar University, Assiut Branch, Assiut, Egypt; Mona Al-Sane,  
18 Department of Developmental and Preventive Sciences, Faculty of Dentistry, Kuwait University, Kuwait; Maha  
19 AbdelSalam, Department of Biomedical Dental Sciences, College of Dentistry, University of Dammam,  
20 Dammam, Saudi Arabia; Wael Sabbah, Department of Population and Patient Health, King's College Hospital,  
21 London, United Kingdom; Arwa I. Owais, Department of Pediatric Dentistry, College of Dentistry, University of  
22 Iowa, Iowa, United States; Fatma Abdelgawad, Department of Pediatric Dentistry and Dental Public Health,  
23 Faculty of Oral and Dental Medicine, Cairo University, Cairo, Egypt; Thiyezen Abdullah Aldhelai, Department  
24 of orthodontic and Pediatric Dentistry, College of Dentistry, University of Ibb, Sanaa, Yemen; Omar Abd El  
25 Sadek El Meligy, Department of Pediatric Dentistry, Faculty of Dentistry, King Abdulaziz University, Jeddah,  
26 Saudi Arabia and Department of Pediatric Dentistry and Dental Public Health, Faculty of Dentistry, Alexandria  
27 University, Alexandria, Egypt; Jehan AlHumaid, Department of Preventive Dental Sciences, College of  
28 Dentistry, University of Dammam, Dammam, Saudi Arabia; Fahad Al-Harbi, Department of Substitutive Dental  
29 Sciences, College of Dentistry, University of Dammam, Dammam, Saudi Arabia.

30  
31  
32  
33  
34  
35  
36  
37  
38  
39  
40  
41  
42  
43  
44  
45  
46  
47  
48  
49  
50  
51 **27 Corresponding author**

52 Prof. Maha El Tantawi, College of Dentistry, University of Dammam, P.O. Box 1982, Dammam Coastal Road,  
53 31441 Dammam, Saudi Arabia. Phone: +966 13 8574928, ext: 216, Fax: + 966 13 8572624. Email:  
54  
55 [maha\\_tantawy@hotmail.com](mailto:maha_tantawy@hotmail.com), [mmtantawy@iau.edu.sa](mailto:mmtantawy@iau.edu.sa), [ORCID: orcid.org/0000-0003-4989-6584](https://orcid.org/0000-0003-4989-6584)

1  
2  
3 31 **Abstract**

4  
5 32 **Objectives**

6  
7 33 This study assessed the intention of dentists in eight Arab countries to report suspected  
8  
9 34 exposure to violence among their patients and factors associated with this intention based on  
10  
11 35 the theory of planned behavior.

12  
13 36 **Methods**

14  
15 37 A cross sectional study was conducted in 2016 including dentists practicing in public, private  
16  
17 38 and academic sectors in Algeria, Egypt, Jordan, Kuwait, Libya, Palestine, Saudi Arabia and  
18  
19 39 Yemen. Respondents were selected using a convenience sample. They answered a self-  
20  
21 40 administered questionnaire that collected information about personal and professional  
22  
23 41 background and perceived ability to identify victims of violence. The questionnaire also  
24  
25 42 assessed (on a scale from 1 to 10 using 6 negative statements) dentists' perception of  
26  
27 43 healthcare system mandated reporting of suspected violence. Six other statements were used  
28  
29 44 to assess professional attitude toward reporting suspected violence. Logistic regression  
30  
31 45 analysis was used to assess the association between intention to report suspected violence and  
32  
33 46 perceived ability, perception and attitude adjusting for confounders.

34  
35 47 **Results**

36  
37 48 The response rate was 65.2% (n= 2,936) with 68.8% intending to report and 52.2%  
38  
39 49 considering themselves able to identify victims of violence. The mean (SD) negative  
40  
41 50 perception score= 5.3 (2.1) and the mean (SD) professional attitude score= 7.5 (1.9). In  
42  
43 51 multivariate regression, intention to report was associated with professional attitude (OR=  
44  
45 52 1.08, 95%CI= 1.03, 1.14), ability to identify violence victims (OR= 1.76, 95%CI=1.45, 2.12)  
46  
47 53 and negative perception that reporting is not mandated (OR= 0.89, 95%CI=0.85, 0.94).  
48  
49 54 Significant differences existed between countries in intention to report.

50  
51 55 **Conclusion**

1  
2  
3 56 Most dentists intended to report suspected violence and their intention could be explained by  
4  
5 57 the theory of planned behavior which offers a framework for professional development so that  
6  
7 58 dentists can support victims of violence. Sharing of training resources, policies and guidelines  
8  
9 59 is needed to ensure that practices similar to international guidelines are consistently adopted  
10  
11 60 by dentists across Arab countries.  
12  
13  
14  
15  
16  
17  
18  
19  
20  
21  
22  
23  
24  
25  
26  
27  
28  
29  
30  
31  
32  
33  
34  
35  
36  
37  
38  
39  
40  
41  
42  
43  
44  
45  
46  
47  
48  
49  
50  
51  
52  
53  
54  
55  
56  
57  
58  
59  
60

For peer review only

1  
2  
3 61 **Strengths and limitations**  
4

- 5 62 • We included dentists from eight Arab countries which increases the geographic  
6  
7 63 representativeness of our findings and fills a knowledge gap about the intended  
8  
9 64 practices of dentists in this region.  
10  
11 65 • The theory of planned behavior provides a frame to explain the intention to report and  
12  
13 66 helps in planning professional development activities to better prepare dentists to help  
14  
15 67 their patients.  
16  
17 68 • Social desirability might have affected our estimates of dentists' intention to report  
18  
19 69 suspected violence.  
20  
21 70 • Dentists in private practice were under represented compared to dentists from the  
22  
23 71 public and academic sectors.  
24  
25  
26  
27  
28

29 73 **Funding statement**  
30

31 74 This research received no specific grant from any funding agency in the public,  
32  
33 75 commercial or not-for-profit sectors.  
34  
35  
36

37 77 **Competing interest statement**  
38

39 78 None declared.  
40  
41  
42  
43

44 80 **Data sharing statement**  
45

46 81 The dataset will be made available from the corresponding author.  
47  
48  
49  
50  
51  
52  
53  
54  
55  
56  
57  
58  
59  
60

## 82 **Introduction**

83 In 2014, the World Health Organization (WHO) issued the first report on the global  
84 status of violence prevention [1]. The report defined interpersonal violence as violence that  
85 occurs between family members, intimate partners, friends, acquaintances and strangers and  
86 includes child maltreatment, intimate partner violence and elder abuse in addition to some  
87 other forms of violence. The report showed that although the problem is preventable and  
88 efforts were already under way to reduce it, much remained to be done. Global statistics [1]  
89 indicate that most cases of violence against children, women and elderly are not reported to  
90 authorities or service providers. This emphasizes the need of the health sector to have a more  
91 active role in documenting and reporting cases of violence.

92 The Eastern Mediterranean Region which includes Arab countries has one of the  
93 highest prevalence of intimate partner violence, the most extensively surveyed of all types of  
94 violence, among the six WHO regions (37%). Comprehensive information about violence  
95 against children and the elderly is not available [1]. Arab countries are more defined by their  
96 shared culture than by being a specific race [2]. Given that what constitutes violence depends  
97 on contextual and cultural norms, what would be labelled as violence against women or  
98 children in western countries, may be culturally acceptable or may be considered a private  
99 matter in Arab countries [3]. Because of this, studies related to violence management that  
100 were conducted in western countries may not apply in Arab countries.

101 Dental care settings are often the primary contact point for violence victims since head  
102 and face injuries are sites with common manifestation of physical violence [4]. Like all health  
103 care professionals, dentists' main goal is to protect human life and the wellbeing of their  
104 patients [5] and therefore, they can play an important role in identifying and reporting victims  
105 of violence. However, we know little about Arab dentists' willingness to report cases of  
106 violence. A review of literature showed that there were few studies that were conducted



1  
2  
3 107 among dentists in Arab countries and that they focused on children abuse; in Jordan [6,7],  
4  
5 108 Saudi Arabia [8, 9] and the United Arab Emirates [10]. However, none of these studies  
6  
7 109 investigated dentists' intention to report suspicion of violence among adults.  
8

9 110 Based on the limited number of studies addressing the issue, there is a need to assess  
10  
11 111 the willingness of dentists in Arab countries to report suspected violence. Such information  
12  
13 112 helps inform public health policy, laws and future intervention programs targeting prevention  
14  
15 113 and management of violence. The hypothesis of the study was that dentists' intention to report  
16  
17 114 violence can be explained by the theory of planned behavior [11] where dentists would be  
18  
19 115 more willing to report if they perceive that the health care system requires them to report  
20  
21 116 (normative beliefs), if they have favorable professional attitude toward reporting (behavioral  
22  
23 117 beliefs) and if they think they are able to identify victims of violence (control beliefs). The  
24  
25 118 aims of this study were to 1) assess the intention of dentists in eight Arab countries to report  
26  
27 119 cases of suspected violence and to 2) identify factors associated with this intention.  
28  
29  
30  
31  
32

### 33 121 **Methods**

34  
35 122 Data for this cross sectional study was collected from April to December 2016 after  
36  
37 123 obtaining the approval of the Research Unit, College of Dentistry, University of Dammam,  
38  
39 124 Saudi Arabia (EA216008) and in accordance with the guidelines of the Helsinki Declaration.  
40  
41 125 Dentists were targeted in 8 Arab countries; Algeria, Egypt, Jordan, Kuwait, Libya, Palestine,  
42  
43 126 Saudi Arabia and Yemen. To assess the prevalence of intention to report, sample size was  
44  
45 127 calculated (<http://www.nss.gov.au/nss/home.nsf/pages/Sample+size+calculator>) using the  
46  
47 128 following assumptions: confidence level= 95%, confidence interval= 5%, total number of  
48  
49 129 dentists in each country [12] with an estimated percentage of reporting suspected violence=  
50  
51 130 32% [10]. The number was increased by 25% to allow for non-response. The minimum  
52  
53 131 required sample size per country ranged from 300 to 470 dentists.  
54  
55  
56  
57  
58  
59  
60

1  
2  
3 132 Participants were selected using convenience sampling including dentists affiliated  
4  
5 133 with professional groups, or from regions where they would be clustered such as capitals and  
6  
7 134 big cities and from different areas in each country to ensure geographic coverage. Because of  
8  
9 135 the war situation in Libya, data collection was restricted only to Eastern Libya. In Algeria,  
10  
11 136 only the city of Annaba was included and the respondents were alumni of Annaba University.

12  
13 137 Dentists were invited to participate if they 1) had a bachelor of dentistry or equivalent  
14  
15 138 degree and 2) were practicing in one of the eight Arab countries. In the beginning, dentists  
16  
17 139 were included only if they were nationals of the country. Later on, this criterion was dropped  
18  
19 140 due to the presence of a considerable percentage of expats in some countries so that the  
20  
21 141 sample would reflect the profession profile in the participating countries.

22  
23 142 Data was collected using a questionnaire that was developed based on previous studies  
24  
25 143 [9, 10, 13]. It consisted of five sections including 20 close-ended questions. The first section  
26  
27 144 sought information about personal background (age in years, gender (male or female) and  
28  
29 145 having children (yes or no)). The 2<sup>nd</sup> section inquired about professional background  
30  
31 146 including specialization (general practitioner or specialist/ consultant), type of practice  
32  
33 147 (private, public or academic sectors), receiving training (yes or no) and perceived ability to  
34  
35 148 identify victims of violence (yes or no). The 3<sup>rd</sup> section assessed perception of mandated  
36  
37 149 reporting of suspected violence. Participants were asked to indicate how much they  
38  
39 150 considered each of six statements was true of the place they worked on a scale from not true  
40  
41 151 at all (1) to very true (10). The statements were all negatively phrased and indicated that  
42  
43 152 reporting was not required by law, not enforced, not a rule of the place one worked, not the  
44  
45 153 dentist's job to do, not culturally acceptable and that there was no specific authority to report  
46  
47 154 to. The 4<sup>th</sup> section assessed respondents' attitude toward reporting violence using 6 statements  
48  
49 155 to which they were asked to indicate agreement on a scale from completely disagree (1) to  
50  
51 156 completely agree (10). The statements indicated that reporting was the right thing to do, was  
52  
53  
54  
55  
56  
57  
58  
59  
60

1  
2  
3 157 the dentist's responsibility, that the dentist would always document the manifestations of  
4  
5 158 suspected violence (positive) in addition to statements indicating that the dentist was too busy  
6  
7 159 with patients to report, that the issue of violence was a family's business where nobody  
8  
9 160 should interfere and that it was embarrassing to check about violence (negative). In the 5<sup>th</sup>  
10  
11 161 section, respondents were asked whether they would report suspected violence to the police,  
12  
13 162 social services agencies/ Ministry of Social Affairs, Ministry of Health, non- governmental  
14  
15 163 organizations (NGOs) or others.

16 164 The questionnaire was preceded by a brief explanation of the study purpose and  
17  
18 165 explained that by responding, the dentist indicated consent to join the study. It took about ten  
19  
20 166 minutes to complete and was self-administered, in Arabic and English, as printed and  
21  
22 167 electronic versions. A respondent received the questionnaire by hand or a link to the  
23  
24 168 electronic version was sent to an email list or by WhatsApp message. The investigator issued  
25  
26 169 three reminders over a period of three months in case of non-response.

## 30 170 Analysis

31  
32 171 The internal consistency of the statements of perception and attitude was assessed  
33  
34 172 using Cronbach alpha. Overall scores of the two constructs were developed by averaging the  
35  
36 173 items' scores after reverse coding negative attitude statements. Higher perception score thus  
37  
38 174 indicated negative perception that dentists were not mandated to report and higher attitude  
39  
40 175 score indicated more positive professional attitude. Separate logistic regression models were  
41  
42 176 developed to assess the association between intention to report suspected violence  
43  
44 177 (dichotomous outcome: yes vs no) and each of (a) perception of mandated reporting (norms)  
45  
46 178 (measured on a scale from 1 to 10), (b) professional attitude toward reporting (measured on a  
47  
48 179 scale from 1 to 10) and (c) perceived ability to identify victims of violence (control) (yes vs  
49  
50 180 no) in addition to personal and professional factors (all were categorical variables except age).  
51  
52 181 Countries were considered to have protective services for children or adults based on the  
53  
54  
55  
56  
57  
58  
59  
60

182 WHO report whether these services were limited, partial or full [1]. All factors were included  
 183 in a multivariable model where they were simultaneously adjusted after removing the factors  
 184 whose estimates showed correlation. All models were adjusted for country of practice. Odds  
 185 ratios, 95% confidence intervals and p values were calculated for all models and so was the  
 186 percentage of correctly classified cases for the model including all variables.

## 188 Results

189 The overall response rate was 65.2% ranging from 51% in Palestine to 78% in Yemen  
 190 (Table 1). Some nationalities practiced in their own countries and in other countries included  
 191 in the study (Egyptians 28.1% vs 29.9%, Jordanians 11.8% vs 12.6% and Yemenis 9.9% vs  
 192 10.4%). The majority of expats were from Asian (5.4%) or other Arab countries not included  
 193 in the study (3.1%). Protective services for victims of violence were not documented in  
 194 Kuwait, Libya and Palestine.

196 Table 1: Response rate, presence of protective services and intention to report by country

| Country      | Response rate   | Documented presence of protective services | Intention to report<br>N (%) |
|--------------|-----------------|--------------------------------------------|------------------------------|
| Algeria      | 110/ 175= 62.9% | Yes                                        | 88 (80%)                     |
| Egypt        | 826/ 1271= 65%  | Yes                                        | 505 (61.1%)                  |
| Jordan       | 347/ 475= 73.1% | Yes                                        | 271 (78.1%)                  |
| Kuwait       | 449/ 632= 71%   | No                                         | 305 (67.9%)                  |
| Libya        | 225/389= 57.8%  | No                                         | 159 (70.7%)                  |
| Palestine    | 380/ 745= 51%   | No                                         | 326 (85.8%)                  |
| Saudi Arabia | 308/ 446= 69.1% | Yes                                        | 190 (61.7%)                  |
| Yemen        | 291/ 373= 78%   | Yes                                        | 175 (60.1%)                  |

|       |                   |              |
|-------|-------------------|--------------|
| Total | 2936/ 4506= 65.2% | 2019 (68.8%) |
|-------|-------------------|--------------|

197

198 The mean (SD) age in years was 31.0 (9.2), 56.7% were females and 53.7% had no  
 199 children (Table 2). Most respondents were general practitioners (70.9%) working in the public  
 200 (43.9%) or private sectors (34.2%). Only 19.3% reported receiving training to manage victims  
 201 of violence and 52.2% claimed that they can identify them. Protective services for victims of  
 202 violence were present in the countries of practice of 64.1% of the respondents.

203

204 Table 2: Personal and professional background of participants

| Factor                                                                        |                        | N (%)        |
|-------------------------------------------------------------------------------|------------------------|--------------|
| Age                                                                           | Mean (SD)              | 31.0 (9.2)   |
| Gender                                                                        | Male                   | 1268 (43.3%) |
|                                                                               | Female                 | 1659 (56.7%) |
| Has no children                                                               |                        | 1571 (53.7%) |
| Specialization                                                                | General practitioner   | 2047 (70.9%) |
|                                                                               | Specialist/ consultant | 839 (29.1%)  |
| Type of practice                                                              | Private sector         | 976 (34.2%)  |
|                                                                               | Public sector          | 1257 (43.9%) |
|                                                                               | Academic sector        | 623 (21.9%)  |
| Received training                                                             |                        | 565 (19.3%)  |
| Perceived ability to identify victims of violence                             |                        | 1445 (52.2%) |
| Presence of protective services for children or adults in country of practice |                        | 1882 (64.1%) |

205

1  
2  
3 206 The majority of respondents indicated their intention to report suspected violence  
4  
5 207 (2019, 68.8%); mainly to the police (933, 31.8%), or social affairs agencies (842, 28.7%)  
6  
7 208 followed by the Ministry of Health (303, 10.3%) and NGOs (132, 4.5%). There was a  
8  
9 209 significant difference among countries in the percentage of dentists indicating intention to  
10  
11 210 report ranging from 60.1% in Yemen to 85.8% in Palestine ( $P < 0.0001$ , Table 1).

12  
13 211 Figure 1 shows that the highest mean negative perception item score was for  
14  
15 212 perceiving that reporting was not enforced (6.5) followed by perceiving that there was no  
16  
17 213 authority to report to (6.2). The internal consistency of perception statements was acceptable  
18  
19 214 (Cronbach alpha = 0.68, 95% C.I.= 0.66, 0.70,  $P < 0.0001$ ) and the mean (SD) equals 5.3 (2.1).  
20  
21 215 The highest mean score for statements of attitude toward reporting was for indicating that it  
22  
23 216 was the right thing to do (8.7) and the lowest was for the negative statement indicating that  
24  
25 217 the respondent was too busy treating patients to report (mean= 3.2). The internal consistency  
26  
27 218 of the statements was good (Cronbach alpha = 0.72, 95% C.I.= 0.70, 0.74,  $P < 0.0001$ ) and the  
28  
29 219 mean (SD) equals 7.5 (1.9).  
30  
31  
32  
33  
34  
35  
36  
37  
38  
39  
40  
41  
42  
43  
44  
45  
46  
47  
48  
49  
50  
51  
52  
53  
54  
55  
56  
57  
58  
59  
60

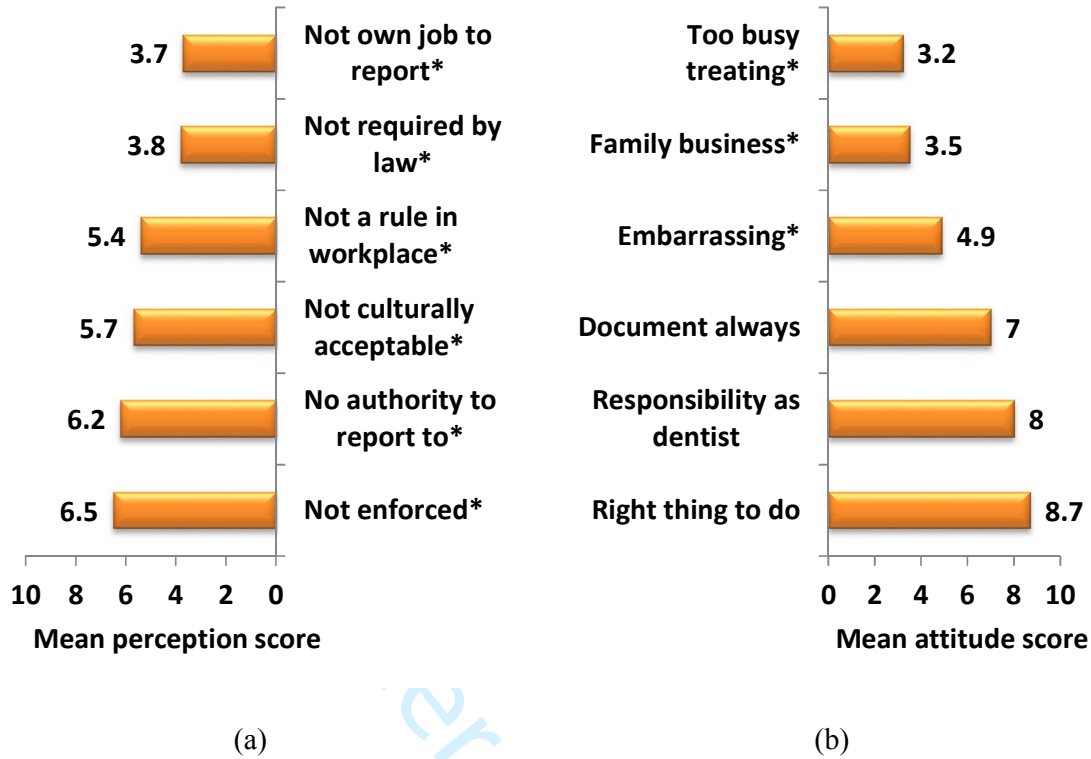

221 Figure 1: (a) Negative perception of mandated reporting, mean (SD)= 5.3 (2.1), range= 1-10,  
 222 (b) Professional attitude toward reporting, mean (SD)= 7.5 (1.9), range= 1-10.  
 223 (\*: negatively phrased statement)

224  
 225 Dentists who practiced in countries where there were protective services for violence  
 226 victims had significantly higher negative perception and lower attitude scores than those  
 227 without such services ( $P < 0.0001$  and  $0.02$ ). Dentists who reported being able to identify  
 228 violence victims had significantly lower negative perception and higher attitude scores than  
 229 those who did not ( $P < 0.0001$ , Table 3). There was a significant moderate negative correlation  
 230 between perception and professional attitude (Pearson  $r = -0.32$ ,  $P < 0.0001$ ).

234 Table 3: Association of perception and attitude with presence of protective services and  
 235 ability to identify victims of violence

|                                | Score: mean (SD)                           |                                               | P value  |
|--------------------------------|--------------------------------------------|-----------------------------------------------|----------|
|                                | Protective services in country of practice | No protective services in country of practice |          |
| Negative perception            | 5.50 (2.13)                                | 4.87 (2.11)                                   | <0.0001* |
| Positive professional attitude | 7.41 (1.94)                                | 7.59 (1.87)                                   | 0.02*    |
|                                | Able to identify victims of violence       | Not able to identify victims of violence      |          |
| Negative perception            | 4.98 (2.17)                                | 5.56 (2.06)                                   | <0.0001* |
| Positive professional attitude | 7.72 (1.85)                                | 7.25 (1.99)                                   | <0.0001* |

236 \*: statistically significant at  $P < 0.05$

237

238 Table 4 shows that attitude, perception and reported ability to identify violence  
 239 victims were significantly associated ( $P < 0.0001$ ) with intention to report in the separate  
 240 models (model 1) in addition to gender ( $P < 0.0001$ ), age ( $P = 0.004$ ) and presence of  
 241 protective services ( $P < 0.0001$ ). In the multivariable model 2, higher odds of intention to  
 242 report were significantly associated with higher professional attitude score (OR= 1.08, 95%  
 243 C.I.= 1.03, 1.14) and reported ability to identify victims of violence (OR= 1.76, 95% C.I.=  
 244 1.45, 2.12). Lower odds of intended reporting were significantly associated with higher score  
 245 of negative perception (OR= 0.89, 95% C.I.= 0.85, 0.94). In addition, the presence of  
 246 protective services was associated with significantly lower odds of intention to report (OR=  
 247 0.34, 95% C.I.= 0.22, 0.50). The multivariable model 2 correctly classified 71.6% of dentists  
 248 based on intention to report suspected violence.

249

250



251 Table 4: Factors associated with intention to report suspected violence

| Factors                                                       | Model 1            |          | Model 2           |          |
|---------------------------------------------------------------|--------------------|----------|-------------------|----------|
|                                                               | OR (95% C.I.)      | P value  | OR (95% C.I.)     | P value  |
| Higher attitude score by one point                            | 1.10 (1.06, 1.15)  | <0.0001* | 1.08 (1.03, 1.14) | 0.002*   |
| Higher negative perception score by one point                 | 0.88 (0.84, 0.92)  | <0.0001* | 0.89 (0.85, 0.94) | <0.0001* |
| Ability to identify victims of violence vs not                | 1.80 (1.52, 2.14)  | <0.0001* | 1.76 (1.45, 2.12) | <0.0001* |
| Male vs female                                                | 1.74 (1.47, 2.06)* | <0.0001* | 1.85 (1.52, 2.25) | <0.0001* |
| Older dentist by one year                                     | 1.01 (1.004, 1.02) | 0.004*   | 1.01 (0.99, 1.02) | 0.36     |
| Has children vs does not have children                        | 1.14 (0.97, 1.35)  | 0.12     | -                 | -        |
| General practitioner vs specialist/ consultant                | 0.99 (0.83, 1.19)  | 0.93     | -                 | -        |
| Working in public vs private sector                           | 0.95 (0.77, 1.18)  | 0.66     | 1.11 (0.87, 1.42) | 0.40     |
| Working in academic vs private sector                         | 0.83 (0.66, 1.05)  | 0.11     | 0.88 (0.68, 1.15) | 0.37     |
| Presence of protective services in country of practice vs not | 0.25 (0.17, 0.36)  | <0.0001* | 0.34 (0.22, 0.50) | <0.0001* |

252 Model 1: includes individual factors adjusted for country of practice

253 Model 2: includes all factors adjusted for country of practice

1  
2  
3 254 OR: odds ratio, C.I.: confidence interval, \*: statistically significant at  $P < 0.05$ . Percent  
4  
5 255 correctly classified by multivariable model: 71.6%.

6  
7 256

8  
9 257 **Discussion**

10  
11 258 Our results indicated a moderate level of dentists' intention to report suspected  
12  
13 259 violence with significant difference among the eight Arab countries. The findings supported  
14  
15 260 the hypothesis and showed that the theory of planned behavior [11] correctly classified most  
16  
17 261 dentists regarding their intention to report suspected violence. A combination of dentist's  
18  
19 262 professional attitude, perceived ability to identify victims of violence and perception of  
20  
21 263 mandatory rules and regulation were associated with intention to report. The presence of  
22  
23 264 protective services in the country of practice was associated with less intention to report.

24  
25 265 Most dentists in the present study (68.8%) indicated they intended to report violence.  
26  
27 266 This finding is similar to those of previous studies in Arab countries such as Jordan [6] and  
28  
29 267 Saudi Arabia [8,9] and western countries such as Scotland [14] and Brazil [15]. However, less  
30  
31 268 intention to report was shown in some studies from Italy [16], Brazil [17] and France [5].

32  
33 269 Even with the most favorable intentions, dentists will not report violence if they  
34  
35 270 cannot identify its signs. In the present study, 52.2% of the respondents reported being able to  
36  
37 271 identify victims of violence. Previous studies showed differences in dentists' perceived ability  
38  
39 272 to identify victims of violence across countries [5,6, 8, 16-18] which might be attributed to  
40  
41 273 variations in training requirements and opportunities across countries.

42  
43 274 Our definition of subjective norms was based on dentists' perception of mandated  
44  
45 275 reporting in the workplace. We used this definition instead of focusing on significant others  
46  
47 276 since the mobility of dentists across countries meant that the values shared by these others  
48  
49 277 may differ from those prevailing in country of practice. The approach we followed was  
50  
51 278 similar to the definition of Ben Natan et al [19] where they focused on those who educated

1  
2  
3 279 nursing students. In the present study, the mean score of negative perception was 5.3/ 10  
4  
5 280 indicating that, on average, no clear message was received by dentists from their work place  
6  
7 281 whether or not to report suspected violence. This was more because dentists felt the law was  
8  
9 282 not enforced than their perception that reporting was not mandated (mean = 6.5 and 3.8). This  
10  
11 283 agrees with Adair et al [20] who concluded that the likelihood of intending to report suspected  
12  
13 284 violence was greater if dentists recognized that they were legally mandated to report.  
14  
15 285 Negative perception in the current study was also related to perceiving that there was no  
16  
17 286 authority to report to and the absence of clear rules. Similar perceptions were reported in  
18  
19 287 previous studies addressing child abuse in Arab countries such as Saudi Arabia [8,9] and in  
20  
21 288 other countries including India [13], United States [21], Brazil [15] and Northern Ireland [22].  
22  
23 289 This inadequate knowledge of how or who to report to might be due to the presence of several  
24  
25 290 potential recipients of violence reports [10] or recent enactment of laws [9].  
26  
27

28  
29 291 In the present study, the presence of protective services was associated with lower  
30  
31 292 odds of intention to report (OR= 0.34), greater negative perception and less positive  
32  
33 293 professional attitude. This might be attributed to dentists not perceiving these services as  
34  
35 294 indicative of real change in social and cultural norms or health care system perspective  
36  
37 295 regarding reporting. Alternatively, they might have considered that care of violence victims  
38  
39 296 was shifted to these services so that they would be ethically justified not to report violence.  
40  
41 297 However, studies using qualitative research techniques are needed for further investigation.  
42  
43

44 298 In our study, respondents had positive professional attitude toward reporting violence  
45  
46 299 (mean= 7.5/ 10) which agrees with previous studies from Saudi Arabia concerning reporting  
47  
48 300 suspected child abuse [9] and domestic violence [23]. It also agrees with the positive attitude  
49  
50 301 expressed by dentists toward their role in managing child abuse in India [24], Scotland [14],  
51  
52 302 Jordan [6], Brazil [18] and Greece [25] as well as domestic violence reporting in Brazil [15],  
53  
54 303 India [26] and France [5]. Such positive professional attitude - similar to dentists' attitude in  
55  
56  
57  
58  
59  
60

1  
2  
3 304 other countries- might differ from some negative attitudes and practices in Arab societies that  
4  
5 305 are seen in violence statistics [1]. The predominance of professional attitude over societal  
6  
7 306 practices agrees with a study showing that cultural differences between Arab and Jewish  
8  
9 307 nursing students in Israel did not affect the intention to screen for domestic violence due to  
10  
11 308 the similarity of their education [19]. It also agrees with a study from Taiwan, a country with  
12  
13 309 eastern cultural values, which showed that nurses did not accept the cultural belief that  
14  
15 310 parents can physically discipline their children because these nurses were exposed to mixed  
16  
17 311 cultural influences from the east and west [27]. The young age of nurses in that study was  
18  
19 312 similar to that of our participants and might explain the similarity between the two studies.  
20  
21  
22 313 However, the professional attitude in our study disagrees with Usta et al [28] who reported  
23  
24 314 that Lebanese physicians considered domestic violence a social problem not a medical one  
25  
26 315 and were ready to intervene only when there was actual physical injury. The difference  
27  
28 316 between that study and ours might be because most of the physicians were in private practice  
29  
30  
31 317 and more likely to be worried about the implications on practice income if their local  
32  
33 318 community resented their intervention. Most of the participants in our study, on the other  
34  
35 319 hand, were in the public or academic sectors.

36  
37 320 Female dentists in our study were less likely to intend reporting suspected violence.  
38  
39 321 The impact of dentist gender in the issue of suspected violence varied among studies. At the  
40  
41 322 level of knowledge of rules and regulation, female dentists in Saudi Arabia were better than  
42  
43 323 males [9]. However, actual reporting of suspected violence was more likely among male  
44  
45 324 dentists in Jordan [7]. Similarly, among Brazilian nurses, of whom 86% were female, under-  
46  
47 325 reporting of violence was noticed and was attributed to conforming to cultural norms [29].  
48  
49 326 Future studies using qualitative research techniques may help elucidate this gender difference  
50  
51 327 and whether it is due to cultural expectations of how females- including dentists- should act or  
52  
53 328 because they are less involved with victims of violence.  
54  
55  
56  
57  
58  
59  
60

1  
2  
3 329 In our study, the theory of planned behavior correctly classified most dentists based on  
4  
5 330 intention to report violence. Previously, the theory predicted the intention of 28% of Israeli  
6  
7 331 nurses to report child abuse [30, 31] and 32% of their intention to screen for domestic  
8  
9 332 violence where attitudes and subjective norms were significant predictors (regression  
10  
11 333 coefficients= 0.15 and 0.05) [19]. Similarly, Feng and Wu [32] explained Taiwanese nurses'  
12  
13 334 intention to report child abuse using the same theory. Greater association with the outcome  
14  
15 335 was attributed to professional attitude than subjective norms. The least impact was for  
16  
17 336 perceived control which was attributed to the inadequate instructions of how to report.  
18  
19

20 337 There are some limitations to this study that should be considered. We assessed the  
21  
22 338 intention to report which might differ from actual reporting [5] and future studies are needed  
23  
24 339 to assess these differences. Self-reporting and social desirability could have affected our  
25  
26 340 estimates of intention to report. We also assessed the intention to report regardless of the type  
27  
28 341 of violence (physical, verbal or otherwise) or victim background (age or gender) and there is a  
29  
30 342 need to investigate how these factors might affect the intention to report. In addition, our  
31  
32 343 estimate of intention to report might have been affected by the under representation of dentists  
33  
34 344 in private practice compared to those in the public and academic sectors.  
35  
36

37 345

## 38 39 346 **Conclusions**

40  
41 347 Our study included about 3,000 dentists out of 59.5 thousand dentists [12] (5%) caring  
42  
43 348 for 213 million in eight Arab countries [33]. Their intention to report violence was associated  
44  
45 349 with professional attitudes, perceptions and perceived abilities which were similar to those of  
46  
47 350 dentists in other countries but never the less, showed differences by country of practice. Our  
48  
49 351 findings have implications for training to improve the reporting of suspected violence by  
50  
51 352 developing dentists' abilities to identify diagnostic signs, fostering favorable attitude and  
52  
53 353 increasing awareness of already existing rules and regulations. There is a need to develop  
54  
55  
56  
57  
58  
59  
60

1  
2  
3 354 shared training resources, policies and clear guidelines that allow consistent professional  
4  
5 355 practices and at the same time acknowledge cultural diversity across countries.  
6  
7  
8  
9  
10  
11  
12  
13  
14  
15  
16  
17  
18  
19  
20  
21  
22  
23  
24  
25  
26  
27  
28  
29  
30  
31  
32  
33  
34  
35  
36  
37  
38  
39  
40  
41  
42  
43  
44  
45  
46  
47  
48  
49  
50  
51  
52  
53  
54  
55  
56  
57  
58  
59  
60

For peer review only

356 **References**

- 357 1. World Health Organization. Global status report on violence prevention. 2014.  
358 Available from:  
359 [http://www.who.int/violence\\_injury\\_prevention/violence/status\\_report/2014/en/](http://www.who.int/violence_injury_prevention/violence/status_report/2014/en/).  
360 Accessed June 10, 2017.
- 361 2. Obeidat BY, Shannak RO, Masa'deh RT, Al-Jarrah IM. Toward better understanding  
362 for Arabian culture: Implications based on Hofstede's cultural model. *Eur J Soc Sci*.  
363 2012;28(4):512-522.
- 364 3. Douki S, Nacef F, Belhadj A, Bouasker A, Ghachem R. Violence against women in  
365 Arab and Islamic countries. *Arch Womens Ment Health*. 2003;6(3):165-171.
- 366 4. Coulthard P, Warburton AL. The role of the dental team in responding to domestic  
367 violence. *Br Dent J*. 2007;203(11):645-648.
- 368 5. Drigeard C, Nicolas E, Hansjacob A, Roger-Leroi V. Educational needs in the field of  
369 detection of domestic violence and neglect: the opinion of a population of French  
370 dentists. *Eur J Dent Educ*. 2012;16(3):156-165.
- 371 6. Owais AIN, Qudeimat MA, Qodceih S. Dentists' involvement in identification and  
372 reporting of child physical abuse: Jordan as a case study. *Int J Paediatr Dent*.  
373 2009;19(4):291-296.
- 374 7. Sonbol HN, Abu-Ghazaleh S, Rajab LD, Baqain ZH, Saman R, Al-Bitar ZB.  
375 Knowledge, educational experiences and attitudes towards child abuse amongst  
376 Jordanian dentists. *Eur J Dent Educ*. 2012;16(1):e158-65.
- 377 8. Al-Dabaan R, Newton JT, Asimakopoulou K. Knowledge, attitudes, and experience of  
378 dentists living in Saudi Arabia toward child abuse and neglect. *Saudi Dent J*.  
379 2014;26(3):79-87.

- 1  
2  
3 380 9. Mogaddam M, Kamal I, Merdad L, Alamoudi N. Knowledge, attitudes, and behaviors  
4  
5 381 of dentists regarding child physical abuse in Jeddah, Saudi Arabia. *Child Abuse Negl.*  
6  
7 382 2016;54:43-56.
- 8  
9 383 10. Al-Amad SH, Awad MA, Al-Farsi LH, Elkhaled RH. Reporting child abuse cases by  
10  
11 384 dentists working in the United Arab Emirates (UAE). *J Forensic Leg Med.*  
12  
13 385 2016;40:12-15.
- 14  
15 386 11. Ajzen I. From intentions to actions: A Theory of Planned Behavior. In: *Action*  
16  
17 387 *Control*. Berlin, Heidelberg: Springer Berlin Heidelberg; 1985:11-39.
- 18  
19 388 12. World Health Organization: Global Health Observatory data repository. Dentistry  
20  
21 389 personnel - Data by country. World Health Organization. 2017. Available from:  
22  
23 390 <http://apps.who.int/gho/data/node.main.HWF2?lang=en>. Accessed June 10, 2017.
- 24  
25 391 13. Deshpande A, Macwan C, Poonacha K, Bargale S, Dhillon S, Porwal P. Knowledge  
26  
27 392 and attitude in regards to physical child abuse amongst medical and dental residents of  
28  
29 393 central Gujarat: A cross-sectional survey. *J Indian Soc Pedod Prev Dent.*  
30  
31 394 2015;33(3):177.
- 32  
33 395 14. Harris CM, Welbury R, Cairns AM. The Scottish dental practitioner's role in  
34  
35 396 managing child abuse and neglect. *Br Dent J.* 2013;214(9):E24-E24.
- 36  
37 397 15. Garbin C, Rovida T, Costa AA, Garbin A. Perceptions and attitudes of public health  
38  
39 398 service dentists in the face of family violence in 24 municipalities in the state of São  
40  
41 399 Paulo, Brazil, 2013-2014. *Epidemiol Serv Saude.* 2016;25(1):1-10.
- 42  
43 400 16. Manea S, Favero GA, Stellini E, Romoli L, Mazzucato M, Facchin P. Dentists'  
44  
45 401 perceptions, attitudes, knowledge, and experience about child abuse and neglect in  
46  
47 402 northeast Italy. *J Clin Pediatr Dent.* 2007;32(1):19-25.
- 48  
49  
50  
51  
52  
53  
54  
55  
56  
57  
58  
59  
60



- 1  
2  
3 403 17. El Sarraf MC, Marego G, Correr GM, Pizzatto E, Losso EM. Physical child abuse:  
4  
5 404 perception, diagnosis, and management by Southern Brazilian pediatric dentists.  
6  
7 405 *Pediatr Dent.* 34(4):e72-76.  
8  
9 406 18. Azevedo MS, Goettems ML, Brito A, Possebon AP, Domingues J, Demarco FF, et al.  
10  
11 407 Child maltreatment: a survey of dentists in southern Brazil. *Braz Oral Res.* 26(1):5-11.  
12  
13 408 19. Ben Natan M, Khater M, Ighbariyea R, Herbet H. Readiness of nursing students to  
14  
15 409 screen women for domestic violence. *Nurse Educ Today.* 2016;44:98-102.  
16  
17 410 20. Adair SM, Yasrebi S, Wray IA, Hanes CM, Sams DR, Russell CM. Demographic,  
18  
19 411 educational, and experiential factors associated with dentists' decisions to report  
20  
21 412 hypothetical cases of child maltreatment. *Pediatr Dent.* 19(8):466-469.  
22  
23 413 21. Thomas JE, Straffon L, Inglehart MR. Knowledge and professional experiences  
24  
25 414 concerning child abuse: an analysis of provider and student responses. *Pediatr Dent.*  
26  
27 415 28(5):438-444.  
28  
29 416 22. Lazenbatt A, Freeman R. Recognizing and reporting child physical abuse: a survey of  
30  
31 417 primary healthcare professionals. *J Adv Nurs.* 2006;56(3):227-236.  
32  
33 418 23. AlAlyani W, Alshouibi E. Dentists' awareness and action towards domestic violence  
34  
35 419 patients. A cross-sectional study among dentists in Western Saudi Arabia. *Saudi Med*  
36  
37 420 *J.* 2017;38(1):82-88.  
38  
39 421 24. Malpani S, Arora J, Diwaker G, Kaleka PK, Parey A, Bontala P. Child abuse and  
40  
41 422 neglect: Do we know enough? A cross-sectional study of knowledge, attitude, and  
42  
43 423 behavior of dentists regarding child abuse and neglect in Pune, India. *J Contemp Dent*  
44  
45 424 *Pract.* 2017;18(2):162-169.  
46  
47 425 25. Laud A, Gizani S, Maragkou S, Welbury R, Papagiannoulis L. Child protection  
48  
49 426 training, experience, and personal views of dentists in the prefecture of Attica, Greece.  
50  
51 427 *Int J Paediatr Dent.* 2013;23(1):64-71.  
52  
53  
54  
55  
56  
57  
58  
59  
60

- 1  
2  
3 428 26. Mythri H, Kashinath KR, Raju AS, Suresh K V, Bharateesh J V. Enhancing the dental  
4  
5 429 professional's responsiveness towards domestic violence; A cross-sectional study. *J*  
6  
7 430 *Clin Diagnostic Res.* 2015;9(6):ZC51-53.  
8  
9 431 27. Feng J-Y, Levine M. Factors associated with nurses' intention to report child abuse: A  
10  
11 432 national survey of Taiwanese nurses. *Child Abuse Negl.* 2005;29(7):783-795.  
12  
13 433 28. Usta J, Feder G, Antoun J. Attitudes towards domestic violence in Lebanon: a  
14  
15 434 qualitative study of primary care practitioners. *Br J Gen Pract.* 2014;64(623):e313-  
16  
17 435 e320.  
18  
19 436 29. Rolim ACA, Moreira GAR, Gondim SMM, Paz S da S, Vieira LJE de S. Factors  
20  
21 437 associated with reporting of abuse against children and adolescents by nurses within  
22  
23 438 Primary Health Care. *Rev Lat Am Enfermagem.* 2014;22(6):1048-1055.  
24  
25 439 30. Ben Natan M, Ben Ari G, Bader T, Hallak M. Universal screening for domestic  
26  
27 440 violence in a department of obstetrics and gynaecology: a patient and carer  
28  
29 441 perspective. *Int Nurs Rev.* 2012;59(1):108-114.  
30  
31 442 31. Ben Natan M, Faour C, Naamhah S, Grinberg K, Klein-Kremer A. Factors affecting  
32  
33 443 medical and nursing staff reporting of child abuse. *Int Nurs Rev.* 2012;59(3):331-337.  
34  
35 444 32. Feng J-Y, Wu Y-WB. Nurses' intention to report child abuse in Taiwan: A test of the  
36  
37 445 theory of planned behavior. *Res Nurs Health.* 2005;28(4):337-347.  
38  
39 446 33. The World Bank. Data for Arab World. Population. 2017. Available from:  
40  
41 447 <http://data.worldbank.org/?locations=1A-DZ>. Accessed June 10, 2017.  
42  
43  
44  
45  
46  
47  
48  
49  
50  
51  
52  
53  
54  
55  
56  
57  
58  
59  
60

1  
2  
3 448 **Authors' contribution**

- 4 449 • Maha El Tantawi, Maha Abdelsalam and Balgis Gaffar developed the study idea and questionnaire.  
5  
6 450 • Maha El Tantawi developed the study methods.  
7  
8 451 • Arheiam Arheiam, Wafaa AbdelAziz, Ola B. Al-Batayneh, Mansor Alhowiti, Sadeq Al-Maweri, Mai  
9  
10 452 A. Dama, Mounir Zaghez, Khalid Saddiq Hassan, Mona Al-Sane, Fatma Abdelgawad, Thiyezen  
11  
12 453 Abdullah Aldhelai, Omar Abd El Sadek El Meligy, Jehan AlHumaid and Fahad Al-Harbi collected  
13  
14 454 data.  
15  
16 455 • Maha El Tantawi, Arheiam Arheiam and Wael Sabbah analyzed and interpreted the results.  
17  
18 456 • Maha El Tantawi, Arheiam Arheiam, Wael Sabbah, Arwa I. Owais, Omar Abd El Sadek El Meligy,  
19  
20 457 Sadeq Al-Maweri and Wafaa AbdelAziz drafted the manuscripts.  
21  
22 458 • All authors read and approved the final manuscript.  
23  
24  
25  
26  
27  
28  
29  
30  
31  
32  
33  
34  
35  
36  
37  
38  
39  
40  
41  
42  
43  
44  
45  
46  
47  
48  
49  
50  
51  
52  
53  
54  
55  
56  
57  
58  
59  
60

**STROBE 2007 (v4) Statement—Checklist of items that should be included in reports of *cross-sectional studies***

| Section/Topic                | Item # | Recommendation                                                                                                                                                                       | Reported on page # |
|------------------------------|--------|--------------------------------------------------------------------------------------------------------------------------------------------------------------------------------------|--------------------|
| <b>Title and abstract</b>    | 1      | (a) Indicate the study's design with a commonly used term in the title or the abstract                                                                                               | 1                  |
|                              |        | (b) Provide in the abstract an informative and balanced summary of what was done and what was found                                                                                  | 2                  |
| <b>Introduction</b>          |        |                                                                                                                                                                                      |                    |
| Background/rationale         | 2      | Explain the scientific background and rationale for the investigation being reported                                                                                                 | 5& 6               |
| Objectives                   | 3      | State specific objectives, including any prespecified hypotheses                                                                                                                     | 6                  |
| <b>Methods</b>               |        |                                                                                                                                                                                      |                    |
| Study design                 | 4      | Present key elements of study design early in the paper                                                                                                                              | 6                  |
| Setting                      | 5      | Describe the setting, locations, and relevant dates, including periods of recruitment, exposure, follow-up, and data collection                                                      | 6                  |
| Participants                 | 6      | (a) Give the eligibility criteria, and the sources and methods of selection of participants                                                                                          | 7                  |
| Variables                    | 7      | Clearly define all outcomes, exposures, predictors, potential confounders, and effect modifiers. Give diagnostic criteria, if applicable                                             | 7& 8               |
| Data sources/<br>measurement | 8*     | For each variable of interest, give sources of data and details of methods of assessment (measurement). Describe comparability of assessment methods if there is more than one group | 7& 8               |
| Bias                         | 9      | Describe any efforts to address potential sources of bias                                                                                                                            | -                  |
| Study size                   | 10     | Explain how the study size was arrived at                                                                                                                                            | 6                  |
| Quantitative variables       | 11     | Explain how quantitative variables were handled in the analyses. If applicable, describe which groupings were chosen and why                                                         | 8                  |
| Statistical methods          | 12     | (a) Describe all statistical methods, including those used to control for confounding                                                                                                | 8                  |
|                              |        | (b) Describe any methods used to examine subgroups and interactions                                                                                                                  | -                  |
|                              |        | (c) Explain how missing data were addressed                                                                                                                                          | -                  |
|                              |        | (d) If applicable, describe analytical methods taking account of sampling strategy                                                                                                   | -                  |
|                              |        | (e) Describe any sensitivity analyses                                                                                                                                                | -                  |
| <b>Results</b>               |        |                                                                                                                                                                                      |                    |
| Participants                 | 13*    | (a) Report numbers of individuals at each stage of study—eg numbers potentially eligible, examined for eligibility, confirmed                                                        | 9                  |

|                          |     |                                                                                                                                                                                                              |        |
|--------------------------|-----|--------------------------------------------------------------------------------------------------------------------------------------------------------------------------------------------------------------|--------|
|                          |     | eligible, included in the study, completing follow-up, and analysed                                                                                                                                          |        |
|                          |     | (b) Give reasons for non-participation at each stage                                                                                                                                                         | -      |
|                          |     | (c) Consider use of a flow diagram                                                                                                                                                                           | -      |
| Descriptive data         | 14* | (a) Give characteristics of study participants (eg demographic, clinical, social) and information on exposures and potential confounders                                                                     | 9& 10  |
|                          |     | (b) Indicate number of participants with missing data for each variable of interest                                                                                                                          | -      |
| Outcome data             | 15* | Report numbers of outcome events or summary measures                                                                                                                                                         | 11&12  |
| Main results             | 16  | (a) Give unadjusted estimates and, if applicable, confounder-adjusted estimates and their precision (eg, 95% confidence interval). Make clear which confounders were adjusted for and why they were included | 12& 13 |
|                          |     | (b) Report category boundaries when continuous variables were categorized                                                                                                                                    | -      |
|                          |     | (c) If relevant, consider translating estimates of relative risk into absolute risk for a meaningful time period                                                                                             | -      |
| Other analyses           | 17  | Report other analyses done—eg analyses of subgroups and interactions, and sensitivity analyses                                                                                                               | -      |
| <b>Discussion</b>        |     |                                                                                                                                                                                                              |        |
| Key results              | 18  | Summarise key results with reference to study objectives                                                                                                                                                     | 14     |
| Limitations              | 19  | Discuss limitations of the study, taking into account sources of potential bias or imprecision. Discuss both direction and magnitude of any potential bias                                                   | 17     |
| Interpretation           | 20  | Give a cautious overall interpretation of results considering objectives, limitations, multiplicity of analyses, results from similar studies, and other relevant evidence                                   | 14-17  |
| Generalisability         | 21  | Discuss the generalisability (external validity) of the study results                                                                                                                                        | 17     |
| <b>Other information</b> |     |                                                                                                                                                                                                              |        |
| Funding                  | 22  | Give the source of funding and the role of the funders for the present study and, if applicable, for the original study on which the present article is based                                                | 4      |

\*Give information separately for cases and controls in case-control studies and, if applicable, for exposed and unexposed groups in cohort and cross-sectional studies.

**Note:** An Explanation and Elaboration article discusses each checklist item and gives methodological background and published examples of transparent reporting. The STROBE checklist is best used in conjunction with this article (freely available on the Web sites of PLoS Medicine at <http://www.plosmedicine.org/>, Annals of Internal Medicine at <http://www.annals.org/>, and Epidemiology at <http://www.epidem.com/>). Information on the STROBE Initiative is available at [www.strobe-statement.org](http://www.strobe-statement.org).

# BMJ Open

## Dentists' intention to report suspected violence: a cross sectional study in eight Arab countries

|                                 |                                                                                                                                                                                                                                                                                                                                                                                                                                                                                                                                                                                                                                                                                                                                                                                                                                                                                                                                                                                                                                                                                                                                                                                                                                                                                                                                                                                                                                                                                                                                                                                                                                                                                                                                               |
|---------------------------------|-----------------------------------------------------------------------------------------------------------------------------------------------------------------------------------------------------------------------------------------------------------------------------------------------------------------------------------------------------------------------------------------------------------------------------------------------------------------------------------------------------------------------------------------------------------------------------------------------------------------------------------------------------------------------------------------------------------------------------------------------------------------------------------------------------------------------------------------------------------------------------------------------------------------------------------------------------------------------------------------------------------------------------------------------------------------------------------------------------------------------------------------------------------------------------------------------------------------------------------------------------------------------------------------------------------------------------------------------------------------------------------------------------------------------------------------------------------------------------------------------------------------------------------------------------------------------------------------------------------------------------------------------------------------------------------------------------------------------------------------------|
| Journal:                        | <i>BMJ Open</i>                                                                                                                                                                                                                                                                                                                                                                                                                                                                                                                                                                                                                                                                                                                                                                                                                                                                                                                                                                                                                                                                                                                                                                                                                                                                                                                                                                                                                                                                                                                                                                                                                                                                                                                               |
| Manuscript ID                   | bmjopen-2017-019786.R1                                                                                                                                                                                                                                                                                                                                                                                                                                                                                                                                                                                                                                                                                                                                                                                                                                                                                                                                                                                                                                                                                                                                                                                                                                                                                                                                                                                                                                                                                                                                                                                                                                                                                                                        |
| Article Type:                   | Research                                                                                                                                                                                                                                                                                                                                                                                                                                                                                                                                                                                                                                                                                                                                                                                                                                                                                                                                                                                                                                                                                                                                                                                                                                                                                                                                                                                                                                                                                                                                                                                                                                                                                                                                      |
| Date Submitted by the Author:   | 22-Dec-2017                                                                                                                                                                                                                                                                                                                                                                                                                                                                                                                                                                                                                                                                                                                                                                                                                                                                                                                                                                                                                                                                                                                                                                                                                                                                                                                                                                                                                                                                                                                                                                                                                                                                                                                                   |
| Complete List of Authors:       | <p>El Tantawi, Maha; University of Dammam, Department of Preventive Dental Sciences<br/> Gaffar, Balgis; University of Dammam, Department of Preventive Dental Sciences<br/> Arheiam, Arheiam; University of Benghazi, Department of Community and Preventive Dentistry<br/> AbdelAziz, Wafaa; Alexandria University, Department of Pediatric Dentistry and Dental Public Health<br/> Al-Batayneh, Ola; Jordan University of Science and Technology, Department of Preventive Dentistry<br/> Alhowiti, Mansor ; Benghazi Psychiatric Hospital<br/> Al-Maweri, Sadeq ; Al-Farabi College<br/> Dama, Mai; Arab American University, Department of Paedodontics and Orthodontics<br/> Zaghez, Mounir ; Universite Badji Mokhtar Annaba, Department of Oral Medicine<br/> Hassan, Khalid ; Al-Azhar University - Assiut Branch, Department of Oral Medicine and Periodontology<br/> Al-Sane, Mona ; Kuwait University, Department of Developmental and Preventive Sciences<br/> AbdelSalam, Maha ; University of Dammam, Department of Biomedical Dental Sciences<br/> Sabbah, Wael; King's College London,<br/> Owais, Arwa ; University of Iowa , Department of Pediatric Dentistry<br/> Abdelgawad , Fatma ; Cairo University, Department of Pediatric Dentistry and Dental Public Health<br/> Aldhelai, Thiyezen ; Ibb University, Department of Orthodontic and Pediatric Dentistry<br/> El Meligy, Omar ; King Abdulaziz University, Department of Pediatric Dentistry; Alexandria University, Department of Pediatric Dentistry and Dental Public Health<br/> AlHumaid, Jehan ; University of Dammam, Department of Preventive Dental Sciences<br/> Al-Harbi, Fahad ; University of Dammam, Department of Substitutive Dental Sciences</p> |
| <b>Primary Subject Heading</b>: | Dentistry and oral medicine                                                                                                                                                                                                                                                                                                                                                                                                                                                                                                                                                                                                                                                                                                                                                                                                                                                                                                                                                                                                                                                                                                                                                                                                                                                                                                                                                                                                                                                                                                                                                                                                                                                                                                                   |
| Secondary Subject Heading:      | Ethics, Global health, Public health                                                                                                                                                                                                                                                                                                                                                                                                                                                                                                                                                                                                                                                                                                                                                                                                                                                                                                                                                                                                                                                                                                                                                                                                                                                                                                                                                                                                                                                                                                                                                                                                                                                                                                          |
| Keywords:                       | International health services < HEALTH SERVICES ADMINISTRATION &                                                                                                                                                                                                                                                                                                                                                                                                                                                                                                                                                                                                                                                                                                                                                                                                                                                                                                                                                                                                                                                                                                                                                                                                                                                                                                                                                                                                                                                                                                                                                                                                                                                                              |

1  
2  
3  
4  
5  
6  
7  
8  
9  
10  
11  
12  
13  
14  
15  
16  
17  
18  
19  
20  
21  
22  
23  
24  
25  
26  
27  
28  
29  
30  
31  
32  
33  
34  
35  
36  
37  
38  
39  
40  
41  
42  
43  
44  
45  
46  
47  
48  
49  
50  
51  
52  
53  
54  
55  
56  
57  
58  
59  
60

|  |                                                                                                                                                               |
|--|---------------------------------------------------------------------------------------------------------------------------------------------------------------|
|  | MANAGEMENT, ETHICS (see Medical Ethics), Human resource management < HEALTH SERVICES ADMINISTRATION & MANAGEMENT, MEDICAL ETHICS, PRIMARY CARE, PUBLIC HEALTH |
|  |                                                                                                                                                               |

SCHOLARONE™  
Manuscripts

For peer review only

1  
2  
3 **1 Dentists' intention to report suspected violence: a cross-sectional study in eight Arab**  
4  
5 **2 countries**

6  
7 3 Maha El Tantawi, Department of Preventive Dental Sciences, College of Dentistry, University of Dammam,  
8  
9 4 Dammam, Saudi Arabia; Balgis Gaffar, Department of Preventive Dental Sciences, College of Dentistry,  
10  
11 5 University of Dammam, Dammam, Saudi Arabia; Arheiam Arheiam, Department of Community and Preventive  
12  
13 6 Dentistry, Faculty of Dentistry, University of Benghazi, Benghazi, Libya; Wafaa AbdelAziz, Department of  
14  
15 7 Pediatric Dentistry and Dental Public Health, Faculty of Dentistry, Alexandria University, Alexandria, Egypt;  
16  
17 8 Ola B. Al-Batayneh, Department of Preventive Dentistry, Jordan University of Science and Technology, Irbid,  
18  
19 9 Jordan; Mansur F. Alhoti, Benghazi Psychiatric Hospital, Benghazi, Libya; Sadeq Al-Maweri, Alfarabi colleges,  
20  
21 10 Riyadh, Saudi Arabia; Mai A. Dama, Department of Paedodontics and Orthodontics, College of Dentistry, The  
22  
23 11 Arab American University, Jenin, Palestine; Mounir Zaghez, Department of Oral Medicine, Faculty of Medicine,  
24  
25 12 Annaba University (BADJI Mokhtar), Annaba, Algeria; Khalid Saddiq Hassan, Department of Oral Medicine  
26  
27 13 and Periodontology, Faculty of Dentistry, AlAzhar University, Assiut Branch, Assiut, Egypt; Mona Al-Sane,  
28  
29 14 Department of Developmental and Preventive Sciences, Faculty of Dentistry, Kuwait University, Kuwait; Maha  
30  
31 15 AbdelSalam, Department of Biomedical Dental Sciences, College of Dentistry, University of Dammam,  
32  
33 16 Dammam, Saudi Arabia; Wael Sabbah, Department of Population and Patient Health, King's College Hospital,  
34  
35 17 London, United Kingdom; Arwa I. Owais, Department of Pediatric Dentistry, College of Dentistry, University of  
36  
37 18 Iowa, Iowa, United States; Fatma Abdelgawad, Department of Pediatric Dentistry and Dental Public Health,  
38  
39 19 Faculty of Oral and Dental Medicine, Cairo University, Cairo, Egypt; Thiyezen Abdullah Aldhelai, Department  
40  
41 20 of orthodontic and Pediatric Dentistry, College of Dentistry, University of Ibb, Sanaa, Yemen; Omar Abd El  
42  
43 21 Sadek El Meligy, Department of Pediatric Dentistry, Faculty of Dentistry, King Abdulaziz University, Jeddah,  
44  
45 22 Saudi Arabia and Department of Pediatric Dentistry and Dental Public Health, Faculty of Dentistry, Alexandria  
46  
47 23 University, Alexandria, Egypt; Jehan AlHumaid, Department of Preventive Dental Sciences, College of  
48  
49 24 Dentistry, University of Dammam, Dammam, Saudi Arabia; Fahad Al-Harbi, Department of Substitutive Dental  
50  
51 25 Sciences, College of Dentistry, University of Dammam, Dammam, Saudi Arabia.

52  
53  
54  
55  
56  
57  
58  
59  
60 **27 Corresponding author**

28 Prof. Maha El Tantawi, College of Dentistry, University of Dammam, P.O. Box 1982, Dammam Coastal Road,  
29 31441 Dammam, Saudi Arabia. Phone: +966 13 8574928, ext: 216, Fax: + 966 13 8572624. Email:  
30 [maha\\_tantawy@hotmail.com](mailto:maha_tantawy@hotmail.com), [mmtantawy@iau.edu.sa](mailto:mmtantawy@iau.edu.sa), [ORCID: orcid.org/0000-0003-4989-6584](https://orcid.org/0000-0003-4989-6584)



1  
2  
3 31 **Abstract**

4  
5 32 **Objectives**

6  
7 33 This study assessed dentists' intention in eight Arab countries to report suspected exposure to  
8  
9 34 violence among patients and factors associated with this intention based on the theory of  
10  
11 35 planned behavior.

12  
13 36 **Methods**

14  
15 37 A cross-sectional study was conducted in 2016 including a convenience sample of dentists  
16  
17 38 practicing in public, private and academic sectors in Algeria, Egypt, Jordan, Kuwait, Libya,  
18  
19 39 Palestine, Saudi Arabia and Yemen. Respondents answered a self-administered questionnaire  
20  
21 40 collecting information about personal and professional background and perceived ability to  
22  
23 41 identify victims of violence. The questionnaire assessed (on a scale from 1 to 10 using 6  
24  
25 42 negative statements) dentists' perception of healthcare system mandated reporting of  
26  
27 43 suspected violence. Six statements were used to assess professional attitude toward reporting  
28  
29 44 suspected violence. Logistic regression was used to assess the association between intention  
30  
31 45 to report suspected violence and perceived ability, perception and attitude adjusting for  
32  
33 46 confounders.

34  
35  
36  
37 47 **Results**

38  
39 48 The response rate was 65.2% (n= 2,936/ 4506) from general practitioners (70.9%) of mean  
40  
41 49 age= 31 years with 56.7% females. Of those, 68.8% intended to report and 52.2% considered  
42  
43 50 themselves able to identify violence victims. The mean (SD) negative perception score=  
44  
45 51 5.3/10 (2.1) and the mean (SD) professional attitude score= 7.5/10 (1.9). In multivariate  
46  
47 52 regression, intention to report was associated with professional attitude (OR= 1.08, 95%CI=  
48  
49 53 1.03, 1.14), ability to identify violence victims (OR= 1.76, 95%CI=1.45, 2.12) and negative  
50  
51 54 perception that reporting is not mandated (OR= 0.89, 95%CI=0.85, 0.94). Significant  
52  
53 55 differences existed among countries in intention to report.

1  
2  
3 56 **Conclusion**  
4

5 57 Most dentists intended to report suspected violence and their intention could be explained by  
6  
7 58 the theory of planned behavior which offers a framework for professional development to  
8  
9 59 support violence victims. Sharing of training resources, policies and guidelines is needed to  
10  
11 60 ensure that practices similar to international guidelines are consistently adopted by dentists  
12  
13 61 across Arab countries.  
14  
15  
16  
17  
18  
19  
20  
21  
22  
23  
24  
25  
26  
27  
28  
29  
30  
31  
32  
33  
34  
35  
36  
37  
38  
39  
40  
41  
42  
43  
44  
45  
46  
47  
48  
49  
50  
51  
52  
53  
54  
55  
56  
57  
58  
59  
60

For peer review only

## 62 **Strengths and limitations**

- 63 • We included dentists from eight Arab countries which increases the geographic  
64 representativeness of our findings and fills a knowledge gap about the intended  
65 practices of dentists in this region.
- 66 • The theory of planned behavior provides a framework to explain the intention to  
67 report and helps in planning professional development activities to better prepare  
68 dentists to help their patients.
- 69 • Social desirability might have affected our estimates of dentists' intention to report  
70 suspected violence.
- 71 • Dentists in private practice were under represented compared to dentists from the  
72 public and academic sectors.

## 74 **Funding statement**

75 This research received no specific grant from any funding agency in the public,  
76 commercial or not-for-profit sectors.

## 78 **Competing interest statement**

79 None declared.

## 81 **Data sharing statement**

82 The dataset will be made available from the corresponding author.

## 83 **Introduction**

84 In 2014, the World Health Organization (WHO) issued the first report on the global  
85 status of violence prevention [1]. The report defined interpersonal violence as violence that  
86 occurs between family members, intimate partners, friends, acquaintances and strangers and  
87 includes child maltreatment, intimate partner violence and elder abuse in addition to some  
88 other forms of violence. The report showed that although the problem is preventable and  
89 efforts were already under way to reduce it, much remained to be done. Global statistics [1]  
90 indicate that most cases of violence against children, women and elderly are not reported to  
91 authorities or service providers. This emphasizes the need of the health sector to have a more  
92 active role in documenting and reporting cases of violence.

93 The Eastern Mediterranean Region which includes Arab countries has one of the  
94 highest prevalence of intimate partner violence, the most extensively surveyed of all types of  
95 violence, among the six WHO regions (37%). Comprehensive information about violence  
96 against children and the elderly is not available [1]. Arab countries are more defined by their  
97 shared culture than by being a specific race [2]. Given that what constitutes violence depends  
98 on contextual and cultural norms, what would be labelled as violence against women or  
99 children in western countries, may be culturally acceptable or may be considered a private  
100 matter in Arab countries [3]. Because of this, studies related to violence management that  
101 were conducted in western countries may not apply in Arab countries.

102 Dental care settings are often the primary contact point for violence victims since head  
103 and face injuries are sites with common manifestation of physical violence [4]. Like all health  
104 care professionals, dentists' main goal is to protect human life and the wellbeing of their  
105 patients [5] and therefore, they can play an important role in identifying and reporting victims  
106 of violence. However, we know little about Arab dentists' willingness to report cases of  
107 violence. A review of literature showed that there were few studies that were conducted

1  
2  
3 108 among dentists in Arab countries and that they focused on children abuse; in Jordan [6,7],  
4  
5 109 Saudi Arabia [8, 9] and the United Arab Emirates [10]. However, none of these studies  
6  
7 110 investigated dentists' intention to report suspicion of violence among adults.  
8

9 111 Based on the limited number of studies addressing the issue, there is a need to assess  
10  
11 112 the willingness of dentists in Arab countries to report suspected violence. Such information  
12  
13 113 helps inform public health policy, laws and future intervention programs targeting prevention  
14  
15 114 and management of violence. The hypothesis of the study was that dentists' intention to report  
16  
17 115 violence can be explained by the theory of planned behavior [11] where dentists would be  
18  
19 116 more willing to report if they perceive that the health care system requires them to report  
20  
21 117 (normative beliefs), if they have favorable professional attitude toward reporting (behavioral  
22  
23 118 beliefs) and if they think they are able to identify victims of violence (control beliefs). The  
24  
25 119 aims of this study were to 1) assess the intention of dentists in eight Arab countries to report  
26  
27 120 cases of suspected violence and to 2) identify factors associated with this intention.  
28  
29  
30

31 121

## 32 122 **Methods**

33  
34  
35 123 Data for this cross-sectional study was collected from April to December 2016 after  
36  
37 124 obtaining the approval of the research ethics committee; the Research Unit in the College of  
38  
39 125 Dentistry, University of Dammam, Saudi Arabia (EA216008) and in accordance with the  
40  
41 126 guidelines of the Helsinki Declaration. Dentists were targeted in eight Arab countries;  
42  
43 127 Algeria, Egypt, Jordan, Kuwait, Libya, Palestine, Saudi Arabia and Yemen. To assess the  
44  
45 128 prevalence of intention to report, sample size was calculated  
46  
47 129 (<http://www.nss.gov.au/nss/home.nsf/pages/Sample+size+calculator>) using the following  
48  
49 130 assumptions: confidence level= 95%, confidence interval= 5%, total number of dentists in  
50  
51 131 each country [12] with an estimated percentage of reporting suspected violence= 32% [10].  
52  
53  
54  
55  
56  
57  
58  
59  
60

1  
2  
3 132 The number was increased by 25% to allow for non-response. The minimum required sample  
4  
5 133 size per country ranged from 300 to 470 dentists.

6  
7 134 Participants were selected using convenience sampling including dentists affiliated  
8  
9 135 with professional groups, or from regions where they would be clustered such as capitals and  
10  
11 136 big cities and from different areas in each country to ensure geographic coverage. Because of  
12  
13 137 the war situation in Libya, data collection was restricted only to Eastern Libya. In Algeria,  
14  
15 138 only the city of Annaba was included and the respondents were alumni of Annaba University.

16  
17 139 Dentists were invited to participate if they 1) had a bachelor of dentistry or equivalent  
18  
19 140 degree and 2) were practicing in one of the eight Arab countries. In the beginning, dentists  
20  
21 141 were included only if they were nationals of the country. Later on, this criterion was dropped  
22  
23 142 due to the presence of a considerable percentage of expats in some countries so that the  
24  
25 143 sample would reflect the profession profile in the participating countries.

26  
27 144 Data was collected using a questionnaire that was developed based on previous studies  
28  
29 145 [9, 10, 13] (supplementary file). It consisted of five sections including 20 close-ended  
30  
31 146 questions. The first section sought information about personal background (age in years,  
32  
33 147 gender (male or female) and having children (yes or no)). The 2<sup>nd</sup> section inquired about  
34  
35 148 professional background including specialization (general practitioner or specialist/  
36  
37 149 consultant), type of practice (private, public or academic sectors), receiving training (yes or  
38  
39 150 no) and perceived ability to identify victims of violence (yes or no). The 3<sup>rd</sup> section assessed  
40  
41 151 perception of mandated reporting of suspected violence. Participants were asked to indicate  
42  
43 152 how much they considered each of six statements was true of the place they worked on a scale  
44  
45 153 from not true at all (1) to very true (10). The statements were all negatively phrased and  
46  
47 154 indicated that reporting was not required by law, not enforced, not a rule of the place one  
48  
49 155 worked, not the dentist's job to do, not culturally acceptable and that there was no specific  
50  
51 156 authority to report to. The 4<sup>th</sup> section assessed respondents' attitude toward reporting violence  
52  
53  
54  
55  
56  
57  
58  
59  
60

1  
2  
3 157 using 6 statements to which they were asked to indicate agreement on a scale from completely  
4  
5 158 disagree (1) to completely agree (10). The statements indicated that reporting was the right  
6  
7 159 thing to do, was the dentist's responsibility, that the dentist would always document the  
8  
9 160 manifestations of suspected violence (positive) in addition to statements indicating that the  
10  
11 161 dentist was too busy with patients to report, that the issue of violence was a family's business  
12  
13 162 where nobody should interfere and that it was embarrassing to check about violence  
14  
15 163 (negative). In the 5<sup>th</sup> section, respondents were asked whether they would report suspected  
16  
17 164 violence to the police, social services agencies/ Ministry of Social Affairs, Ministry of Health,  
18  
19 165 non- governmental organizations (NGOs) or others. The questionnaire was pilot tested and  
20  
21 166 culturally adapted in each country.

22  
23  
24 167 The questionnaire was preceded by a brief explanation of the study purpose and  
25  
26 168 explained that by responding, the dentist indicated consent to join the study. It took about ten  
27  
28 169 minutes to complete and was self-administered, in Arabic and English, as printed and  
29  
30 170 electronic versions. A respondent received the questionnaire by hand or a link to the  
31  
32 171 electronic version was sent to an email list or by WhatsApp message. The investigator issued  
33  
34 172 three reminders over a period of three months in case of non-response.

### 35 36 37 173 Analysis

38  
39 174 The internal consistency of the statements of perception and attitude was assessed  
40  
41 175 using Cronbach alpha. Overall scores of the two constructs were developed by averaging the  
42  
43 176 items' scores after reverse coding negative attitude statements. Higher perception score thus  
44  
45 177 indicated less (negative) perception so that dentists considered themselves not mandated to  
46  
47 178 report and higher attitude score indicated more positive professional attitude. Separate logistic  
48  
49 179 regression models were developed to assess the association between intention to report  
50  
51 180 suspected violence (dichotomous outcome: yes vs no) and each of (a) perception of mandated  
52  
53 181 reporting (norms) (measured on a scale from 1 to 10), (b) professional attitude toward  
54  
55  
56  
57  
58  
59  
60

182 reporting (measured on a scale from 1 to 10) and (c) perceived ability to identify victims of  
 183 violence (control) (yes vs no) in addition to personal and professional factors (all were  
 184 categorical variables except age). Countries were considered to have protective services for  
 185 children or adults based on the WHO report whether these services were limited, partial or  
 186 full [1]. All factors were included in a multivariable model where they were simultaneously  
 187 adjusted after removing the factors whose estimates showed correlation. All models were  
 188 adjusted for country of practice. Odds ratios, 95% confidence intervals and p values were  
 189 calculated for all models and so was the percentage of correctly classified cases for the model  
 190 including all variables.

191

## 192 Results

193 The overall response rate was 65.2% ranging from 51% in Palestine to 78% in Yemen  
 194 (Table 1). Some nationalities practiced in their own countries and in other countries included  
 195 in the study (Egyptians 28.1% vs 29.9%, Jordanians 11.8% vs 12.6% and Yemenis 9.9% vs  
 196 10.4%). The majority of expats were from Asian (5.4%) or other Arab countries not included  
 197 in the study (3.1%). Protective services for victims of violence were not documented in  
 198 Kuwait, Libya and Palestine.

199

200 Table 1: Response rate, presence of protective services and intention to report by country

| Country | Response rate   | Documented presence of protective services | Intention to report<br>N (%) |
|---------|-----------------|--------------------------------------------|------------------------------|
| Algeria | 110/ 175= 62.9% | Yes                                        | 88 (80%)                     |
| Egypt   | 826/ 1271= 65%  | Yes                                        | 505 (61.1%)                  |
| Jordan  | 347/ 475= 73.1% | Yes                                        | 271 (78.1%)                  |
| Kuwait  | 449/ 632= 71%   | No                                         | 305 (67.9%)                  |



|              |                   |     |              |
|--------------|-------------------|-----|--------------|
| Libya        | 225/389= 57.8%    | No  | 159 (70.7%)  |
| Palestine    | 380/ 745= 51%     | No  | 326 (85.8%)  |
| Saudi Arabia | 308/ 446= 69.1%   | Yes | 190 (61.7%)  |
| Yemen        | 291/ 373= 78%     | Yes | 175 (60.1%)  |
| Total        | 2936/ 4506= 65.2% |     | 2019 (68.8%) |

201

202 The mean (SD) age in years was 31.0 (9.2), 56.7% were females and 53.7% had no  
 203 children (Table 2). Most respondents were general practitioners (70.9%) working in the public  
 204 (43.9%) or private sectors (34.2%). Only 19.3% reported receiving training to manage victims  
 205 of violence and 52.2% claimed that they can identify them. Protective services for victims of  
 206 violence were present in the countries of practice of 64.1% of the respondents.

207

208 Table 2: Personal and professional background of participants

| Factor                                            | N (%)                  |              |
|---------------------------------------------------|------------------------|--------------|
| Age                                               | Mean (SD)              | 31.0 (9.2)   |
| Gender                                            | Male                   | 1268 (43.3%) |
|                                                   | Female                 | 1659 (56.7%) |
| Has no children                                   |                        | 1571 (53.7%) |
| Specialization                                    | General practitioner   | 2047 (70.9%) |
|                                                   | Specialist/ Consultant | 839 (29.1%)  |
| Type of practice                                  | Private sector         | 976 (34.2%)  |
|                                                   | Public sector          | 1257 (43.9%) |
|                                                   | Academic sector        | 623 (21.9%)  |
| Received training                                 |                        | 565 (19.3%)  |
| Perceived ability to identify victims of violence |                        | 1445 (52.2%) |

|                                                                               |              |
|-------------------------------------------------------------------------------|--------------|
| Presence of protective services for children or adults in country of practice | 1882 (64.1%) |
|-------------------------------------------------------------------------------|--------------|

209

210 The majority of respondents indicated their intention to report suspected violence  
 211 (2019, 68.8%); mainly to the police (933, 31.8%), or social affairs agencies (842, 28.7%)  
 212 followed by the Ministry of Health (303, 10.3%) and NGOs (132, 4.5%). There was a  
 213 significant difference among countries in the percentage of dentists indicating intention to  
 214 report ranging from 60.1% in Yemen to 85.8% in Palestine ( $P < 0.0001$ , Table 1).

215 Figure 1 shows that the highest mean negative perception item score was for  
 216 perceiving that reporting was not enforced (6.5) followed by perceiving that there was no  
 217 authority to report to (6.2). The internal consistency of perception statements was acceptable  
 218 (Cronbach alpha = 0.68, 95% CI= 0.66, 0.70,  $P < 0.0001$ ) and the mean (SD) equals 5.3 (2.1).  
 219 The highest mean score for statements of attitude toward reporting (Figure 2) was for  
 220 indicating that it was the right thing to do (8.7) and the lowest was for the negative statement  
 221 indicating that the respondent was too busy treating patients to report (mean= 3.2). The  
 222 internal consistency of the statements was good (Cronbach alpha = 0.72, 95% CI= 0.70, 0.74,  
 223  $P < 0.0001$ ) and the mean (SD) equals 7.5 (1.9).

224 Dentists who practiced in countries where there were protective services for violence  
 225 victims had significantly higher negative perception and lower attitude scores than those  
 226 without such services ( $P < 0.0001$  and 0.02). Dentists who reported being able to identify  
 227 violence victims had significantly lower negative perception and higher attitude scores than  
 228 those who did not ( $P < 0.0001$ , Table 3). There was a significant moderate negative correlation  
 229 between perception and professional attitude (Pearson  $r = -0.32$ ,  $P < 0.0001$ ).

230

231

232 Table 3: Association of perception and attitude with presence of protective services and  
 233 ability to identify victims of violence

|                                | Score: mean (SD)                           |                                               | P value  |
|--------------------------------|--------------------------------------------|-----------------------------------------------|----------|
|                                | Protective services in country of practice | No protective services in country of practice |          |
| Negative perception            | 5.50 (2.13)                                | 4.87 (2.11)                                   | <0.0001* |
| Positive professional attitude | 7.41 (1.94)                                | 7.59 (1.87)                                   | 0.02*    |
|                                | Able to identify victims of violence       | Not able to identify victims of violence      |          |
| Negative perception            | 4.98 (2.17)                                | 5.56 (2.06)                                   | <0.0001* |
| Positive professional attitude | 7.72 (1.85)                                | 7.25 (1.99)                                   | <0.0001* |

234 \*: statistically significant at  $P < 0.05$

235  
 236 Table 4 shows that attitude, perception and reported ability to identify violence  
 237 victims were significantly associated ( $P < 0.0001$ ) with intention to report in the separate  
 238 models (model 1) in addition to gender ( $P < 0.0001$ ), age ( $P = 0.004$ ) and presence of  
 239 protective services ( $P < 0.0001$ ). In the multivariable model 2, higher odds of intention to  
 240 report were significantly associated with higher professional attitude score (OR= 1.08, 95%  
 241 CI= 1.03, 1.14) and reported ability to identify victims of violence (OR= 1.76, 95% CI= 1.45,  
 242 2.12). Lower odds of intended reporting were significantly associated with higher score of  
 243 negative perception (OR= 0.89, 95% CI= 0.85, 0.94). In addition, the presence of protective  
 244 services was associated with significantly lower odds of intention to report (OR= 0.34, 95%  
 245 CI= 0.22, 0.50). The multivariable model 2 correctly classified 71.6% of dentists based on  
 246 intention to report suspected violence.

247  
 248

249 Table 4: Factors associated with intention to report suspected violence

| Factors                                                       | Model 1            |          | Model 2           |          |
|---------------------------------------------------------------|--------------------|----------|-------------------|----------|
|                                                               | OR (95% CI)        | P value  | OR (95% CI)       | P value  |
| Higher attitude score by one point                            | 1.10 (1.06, 1.15)  | <0.0001* | 1.08 (1.03, 1.14) | 0.002*   |
| Higher negative perception score by one point                 | 0.88 (0.84, 0.92)  | <0.0001* | 0.89 (0.85, 0.94) | <0.0001* |
| Ability to identify victims of violence vs not                | 1.80 (1.52, 2.14)  | <0.0001* | 1.76 (1.45, 2.12) | <0.0001* |
| Male vs female                                                | 1.74 (1.47, 2.06)* | <0.0001* | 1.85 (1.52, 2.25) | <0.0001* |
| Older dentist by one year                                     | 1.01 (1.004, 1.02) | 0.004*   | 1.01 (0.99, 1.02) | 0.36     |
| Has children vs does not have children                        | 1.14 (0.97, 1.35)  | 0.12     | -                 | -        |
| General practitioner vs specialist/ consultant                | 0.99 (0.83, 1.19)  | 0.93     | -                 | -        |
| Working in public vs private sector                           | 0.95 (0.77, 1.18)  | 0.66     | 1.11 (0.87, 1.42) | 0.40     |
| Working in academic vs private sector                         | 0.83 (0.66, 1.05)  | 0.11     | 0.88 (0.68, 1.15) | 0.37     |
| Presence of protective services in country of practice vs not | 0.25 (0.17, 0.36)  | <0.0001* | 0.34 (0.22, 0.50) | <0.0001* |

250 Model 1: includes individual factors adjusted for country of practice

251 Model 2: includes all factors adjusted for country of practice

1  
2  
3 252 OR: odds ratio, CI: confidence interval, \*: statistically significant at  $P < 0.05$ . Percent  
4  
5 253 correctly classified by multivariable model: 71.6%.

6  
7 254

8  
9 255 **Discussion**

10  
11 256 Our results indicated a moderate level of dentists' intention to report suspected  
12  
13 257 violence with significant difference among the eight Arab countries. The findings supported  
14  
15 258 the hypothesis and showed that the theory of planned behavior [11] correctly classified most  
16  
17 259 dentists regarding their intention to report suspected violence. A combination of dentist's  
18  
19 260 professional attitude, perceived ability to identify victims of violence and perception of  
20  
21 261 mandatory rules and regulation were associated with intention to report. The presence of  
22  
23 262 protective services in the country of practice was associated with less intention to report.  
24  
25

26  
263 Most dentists in the present study (68.8%) indicated they intended to report violence.  
27  
28 264 This finding is similar to those of previous studies in Arab countries such as Jordan [6] and  
29  
30 265 Saudi Arabia [8,9] and western countries such as Scotland [14] and Brazil [15]. However, less  
31  
32 266 intention to report was shown in some studies from Italy [16], Brazil [17] and France [5].  
33  
34

35 267 Even with the most favorable intentions, dentists will not report violence if they  
36  
37 268 cannot identify its signs. In the present study, 52.2% of the respondents reported being able to  
38  
39 269 identify victims of violence. Previous studies showed differences in dentists' perceived ability  
40  
41 270 to identify victims of violence across countries [5,6, 8, 16-18] which might be attributed to  
42  
43 271 variations in training requirements and opportunities across countries.  
44  
45

46 272 Our definition of subjective norms was based on dentists' perception of mandated  
47  
48 273 reporting in the workplace. We used this definition instead of focusing on significant others  
49  
50 274 since the mobility of dentists across countries meant that the values shared by these others  
51  
52 275 may differ from those prevailing in country of practice. The approach we followed was  
53  
54 276 similar to the definition of Ben Natan et al [19] where they focused on those who educated  
55  
56  
57  
58  
59  
60

1  
2  
3 277 nursing students. In the present study, the mean score of negative perception was 5.3/ 10  
4  
5 278 indicating that, on average, no clear message was received by dentists from their work place  
6  
7 279 whether or not to report suspected violence. This was more because dentists felt the law was  
8  
9 280 not enforced than their perception that reporting was not mandated (mean = 6.5 and 3.8). This  
10  
11 281 agrees with Adair et al [20] who concluded that the likelihood of intending to report suspected  
12  
13 282 violence was greater if dentists recognized that they were legally mandated to report.  
14  
15 283 Negative perception in the current study was also related to perceiving that there was no  
16  
17 284 authority to report to and the absence of clear rules. Similar perceptions were reported in  
18  
19 285 previous studies addressing child abuse in Arab countries such as Saudi Arabia [8,9] and in  
20  
21 286 other countries including India [13], United States [21], Brazil [15] and Northern Ireland [22].  
22  
23 287 This inadequate knowledge of how or who to report to might be due to the presence of several  
24  
25 288 potential recipients of violence reports [10] or recent enactment of laws [9].  
26  
27

28  
29 289 In the present study, the presence of protective services was associated with lower  
30  
31 290 odds of intention to report (OR= 0.34), greater negative perception and less positive  
32  
33 291 professional attitude. This might be attributed to dentists not perceiving these services as  
34  
35 292 indicative of real change in social and cultural norms or health care system perspective  
36  
37 293 regarding reporting. Alternatively, they might have considered that care of violence victims  
38  
39 294 was shifted to these services so that they would be ethically justified not to report violence.  
40  
41 295 However, studies using qualitative research techniques are needed for further investigation.  
42  
43

44 296 In our study, respondents had positive professional attitude toward reporting violence  
45  
46 297 (mean= 7.5/ 10) which agrees with previous studies from Saudi Arabia concerning reporting  
47  
48 298 suspected child abuse [9] and domestic violence [23]. It also agrees with the positive attitude  
49  
50 299 expressed by dentists toward their role in managing child abuse in India [24], Scotland [14],  
51  
52 300 Jordan [6], Brazil [18] and Greece [25] as well as domestic violence reporting in Brazil [15],  
53  
54 301 India [26] and France [5]. Such positive professional attitude - similar to dentists' attitude in  
55  
56  
57  
58  
59  
60

1  
2  
3 302 other countries- might differ from some negative attitudes and practices in Arab societies that  
4  
5 303 are seen in violence statistics [1]. The predominance of professional attitude over societal  
6  
7 304 practices agrees with a study showing that cultural differences between Arab and Jewish  
8  
9 305 nursing students in Israel did not affect the intention to screen for domestic violence due to  
10  
11 306 the similarity of their education [19]. It also agrees with a study from Taiwan, a country with  
12  
13 307 eastern cultural values, which showed that nurses did not accept the cultural belief that  
14  
15 308 parents can physically discipline their children because these nurses were exposed to mixed  
16  
17 309 cultural influences from the east and west [27]. The young age of nurses in that study was  
18  
19 310 similar to that of our participants and might explain the similarity between the two studies.  
20  
21  
22 311 However, the professional attitude in our study disagrees with Usta et al [28] who reported  
23  
24 312 that Lebanese physicians considered domestic violence a social problem not a medical one  
25  
26 313 and were ready to intervene only when there was actual physical injury. The difference  
27  
28 314 between that study and ours might be because most of the physicians were in private practice  
29  
30  
31 315 and more likely to be worried about the implications on practice income if their local  
32  
33 316 community resented their intervention. Most of the participants in our study, on the other  
34  
35 317 hand, were in the public or academic sectors.

36  
37 318 Female dentists in our study were less likely to intend reporting suspected violence.  
38  
39 319 The impact of dentist gender in the issue of suspected violence varied among studies. At the  
40  
41 320 level of knowledge of rules and regulation, female dentists in Saudi Arabia were better than  
42  
43 321 males [9]. However, actual reporting of suspected violence was more likely among male  
44  
45 322 dentists in Jordan [7]. Similarly, among Brazilian nurses, of whom 86% were female, under-  
46  
47 323 reporting of violence was noticed and was attributed to conforming to cultural norms [29].  
48  
49 324 Future studies using qualitative research techniques may help elucidate this gender difference  
50  
51 325 and whether it is due to cultural expectations of how females- including dentists- should act or  
52  
53 326 because they are less involved with victims of violence.  
54  
55  
56  
57  
58  
59  
60

1  
2  
3 327 In our study, the theory of planned behavior correctly classified most dentists based on  
4  
5 328 intention to report violence. Previously, the theory predicted the intention of 28% of Israeli  
6  
7 329 nurses to report child abuse [30, 31] and 32% of their intention to screen for domestic  
8  
9 330 violence where attitudes and subjective norms were significant predictors (regression  
10  
11 331 coefficients= 0.15 and 0.05) [19]. Similarly, Feng and Wu [32] explained Taiwanese nurses'  
12  
13 332 intention to report child abuse using the same theory. Greater association with the outcome  
14  
15 333 was attributed to professional attitude than subjective norms. The least impact was for  
16  
17 334 perceived control which was attributed to the inadequate instructions of how to report.

18  
19  
20 335 There are some limitations to this study that should be considered. We assessed the  
21  
22 336 intention to report which might differ from actual reporting [5] and future studies are needed  
23  
24 337 to assess these differences. Self-reporting and social desirability could have affected our  
25  
26 338 estimates of intention to report. We also assessed the intention to report regardless of the type  
27  
28 339 of violence (physical, verbal or otherwise) or victim background (age or gender) and there is a  
29  
30 340 need to investigate how these factors might affect the intention to report. In addition, our  
31  
32 341 estimate of intention to report might have been affected by the under representation of dentists  
33  
34 342 in private practice compared to those in the public and academic sectors. Our results need to  
35  
36 343 be interpreted with caution due to the convenience sample we used.

37  
38  
39 344

## 40 41 345 **Conclusions**

42  
43 346 Our study included about 3,000 dentists out of 59.5 thousand dentists [12] (5%) caring  
44  
45 347 for 213 million in eight Arab countries [33]. Their intention to report violence was associated  
46  
47 348 with professional attitudes, perceptions and perceived abilities which were similar to those of  
48  
49 349 dentists in other countries [34, 35] but never the less, showed differences by country of  
50  
51 350 practice. Our findings have implications for training to improve the reporting of suspected  
52  
53 351 violence by developing dentists' abilities to identify diagnostic signs, fostering favorable  
54  
55  
56  
57  
58  
59  
60



1  
2  
3  
4  
5  
6  
7  
8  
9  
10  
11  
12  
13  
14  
15  
16  
17  
18  
19  
20  
21  
22  
23  
24  
25  
26  
27  
28  
29  
30  
31  
32  
33  
34  
35  
36  
37  
38  
39  
40  
41  
42  
43  
44  
45  
46  
47  
48  
49  
50  
51  
52  
53  
54  
55  
56  
57  
58  
59  
60

352 attitude and increasing awareness of already existing rules and regulations. There is a need to  
353 develop shared training resources, policies and clear guidelines that allow consistent  
354 professional practices and at the same time acknowledge cultural diversity across countries.

For peer review only

355 **References**

- 356 1. World Health Organization. Global status report on violence prevention 2014.  
357 Available from:  
358 [http://www.who.int/violence\\_injury\\_prevention/violence/status\\_report/2014/en/](http://www.who.int/violence_injury_prevention/violence/status_report/2014/en/).  
359 Accessed June 10, 2017.
- 360 2. Obeidat BY, Shannak RO, Masa'deh RT, Al-Jarrah IM. Toward better understanding  
361 for Arabian culture: Implications based on Hofstede's cultural model. *Eur J Soc Sci*.  
362 2012;28(4):512-522.
- 363 3. Douki S, Nacef F, Belhadj A, Bouasker A, Ghachem R. Violence against women in  
364 Arab and Islamic countries. *Arch Womens Ment Health*. 2003;6(3):165-171.
- 365 4. Coulthard P, Warburton AL. The role of the dental team in responding to domestic  
366 violence. *Br Dent J*. 2007;203(11):645-648.
- 367 5. Drigeard C, Nicolas E, Hansjacob A, Roger-Leroi V. Educational needs in the field of  
368 detection of domestic violence and neglect: the opinion of a population of French  
369 dentists. *Eur J Dent Educ*. 2012;16(3):156-165.
- 370 6. Owais AIN, Qudeimat MA, Qodceih S. Dentists' involvement in identification and  
371 reporting of child physical abuse: Jordan as a case study. *Int J Paediatr Dent*.  
372 2009;19(4):291-296.
- 373 7. Sonbol HN, Abu-Ghazaleh S, Rajab LD, Baqain ZH, Saman R, Al-Bitar ZB.  
374 Knowledge, educational experiences and attitudes towards child abuse amongst  
375 Jordanian dentists. *Eur J Dent Educ*. 2012;16(1):e158-e165.
- 376 8. Al-Dabaan R, Newton JT, Asimakopoulou K. Knowledge, attitudes, and experience of  
377 dentists living in Saudi Arabia toward child abuse and neglect. *Saudi Dent J*.  
378 2014;26(3):79-87.

- 1  
2  
3 379 9. Mogaddam M, Kamal I, Merdad L, Alamoudi N. Knowledge, attitudes, and behaviors  
4  
5 380 of dentists regarding child physical abuse in Jeddah, Saudi Arabia. *Child Abuse Negl.*  
6  
7 381 2016;54:43-56.
- 8  
9 382 10. Al-Amad SH, Awad MA, Al-Farsi LH, Elkhaled RH. Reporting child abuse cases by  
10  
11 383 dentists working in the United Arab Emirates (UAE). *J Forensic Leg Med.*  
12  
13 384 2016;40:12-15.
- 14  
15 385 11. Ajzen I. From intentions to actions: A theory of planned behavior. In: *Action control.*  
16  
17 386 Berlin, Heidelberg: Springer Berlin Heidelberg; 1985:11-39.
- 18  
19 387 12. World Health Organization: Global Health Observatory data repository. Dentistry  
20  
21 388 personnel - Data by country. World Health Organization. 2017. Available from:  
22  
23 389 <http://apps.who.int/gho/data/node.main.HWF2?lang=en>. Accessed June 10, 2017.
- 24  
25 390 13. Deshpande A, Macwan C, Poonacha K, Bargale S, Dhillon S, Porwal P. Knowledge  
26  
27 391 and attitude in regards to physical child abuse amongst medical and dental residents of  
28  
29 392 central Gujarat: A cross-sectional survey. *J Indian Soc Pedod Prev Dent.*  
30  
31 393 2015;33(3):177-182.
- 32  
33 394 14. Harris CM, Welbury R, Cairns AM. The Scottish dental practitioner's role in  
34  
35 395 managing child abuse and neglect. *Br Dent J.* 2013;214(9):E24.
- 36  
37 396 15. Garbin C, Rovida T, Costa AA, Garbin A. Perceptions and attitudes of public health  
38  
39 397 service dentists in the face of family violence in 24 municipalities in the state of São  
40  
41 398 Paulo, Brazil, 2013-2014. *Epidemiol Serv Saude.* 2016;25(1):1-10.
- 42  
43 399 16. Manea S, Favero GA, Stellini E, Romoli L, Mazzucato M, Facchin P. Dentists'  
44  
45 400 perceptions, attitudes, knowledge, and experience about child abuse and neglect in  
46  
47 401 northeast Italy. *J Clin Pediatr Dent.* 2007;32(1):19-25.
- 48  
49  
50  
51  
52  
53  
54  
55  
56  
57  
58  
59  
60

- 1  
2  
3 402 17. El Sarraf MC, Marego G, Correr GM, Pizzatto E, Losso EM. Physical child abuse:  
4  
5 403 perception, diagnosis, and management by Southern Brazilian pediatric dentists.  
6  
7 404 *Pediatr Dent.* 34(4):e72-76.  
8  
9 405 18. Azevedo MS, Goettems ML, Brito A, Possebon AP, Domingues J, Demarco FF, et al.  
10  
11 406 Child maltreatment: a survey of dentists in southern Brazil. *Braz Oral Res.* 26(1):5-11.  
12  
13 407 19. Ben Natan M, Khater M, Ighbariyea R, Herbet H. Readiness of nursing students to  
14  
15 408 screen women for domestic violence. *Nurse Educ Today.* 2016;44:98-102.  
16  
17 409 20. Adair SM, Yasrebi S, Wray IA, Hanes CM, Sams DR, Russell CM. Demographic,  
18  
19 410 educational, and experiential factors associated with dentists' decisions to report  
20  
21 411 hypothetical cases of child maltreatment. *Pediatr Dent.* 19(8):466-469.  
22  
23 412 21. Thomas JE, Straffon L, Inglehart MR. Knowledge and professional experiences  
24  
25 413 concerning child abuse: an analysis of provider and student responses. *Pediatr Dent.*  
26  
27 414 28(5):438-444.  
28  
29 415 22. Lazenbatt A, Freeman R. Recognizing and reporting child physical abuse: a survey of  
30  
31 416 primary healthcare professionals. *J Adv Nurs.* 2006;56(3):227-236.  
32  
33 417 23. AlAlyani W, Alshouibi E. Dentists' awareness and action towards domestic violence  
34  
35 418 patients. A cross-sectional study among dentists in Western Saudi Arabia. *Saudi Med*  
36  
37 419 *J.* 2017;38(1):82-88.  
38  
39 420 24. Malpani S, Arora J, Diwaker G, Kaleka PK, Parey A, Bontala P. Child abuse and  
40  
41 421 neglect: Do we know enough? A cross-sectional study of knowledge, attitude, and  
42  
43 422 behavior of dentists regarding child abuse and neglect in Pune, India. *J Contemp Dent*  
44  
45 423 *Pract.* 2017;18(2):162-169.  
46  
47 424 25. Laud A, Gizani S, Maragkou S, Welbury R, Papagiannoulis L. Child protection  
48  
49 425 training, experience, and personal views of dentists in the prefecture of Attica, Greece.  
50  
51 426 *Int J Paediatr Dent.* 2013;23(1):64-71.  
52  
53  
54  
55  
56  
57  
58  
59  
60

- 1  
2  
3 427 26. Mythri H, Kashinath KR, Raju AS, Suresh K V, Bharateesh J V. Enhancing the dental  
4  
5 428 professional's responsiveness towards domestic violence; A cross-sectional study. *J*  
6  
7 429 *Clin Diagnostic Res.* 2015;9(6):ZC51-ZC53.  
8  
9 430 27. Feng J-Y, Levine M. Factors associated with nurses' intention to report child abuse: A  
10  
11 431 national survey of Taiwanese nurses. *Child Abuse Negl.* 2005;29(7):783-795.  
12  
13 432 28. Usta J, Feder G, Antoun J. Attitudes towards domestic violence in Lebanon: a  
14  
15 433 qualitative study of primary care practitioners. *Br J Gen Pract.* 2014;64(623):e313-  
16  
17 434 e320.  
18  
19 435 29. Rolim ACA, Moreira GAR, Gondim SMM, Paz S da S, Vieira LJE de S. Factors  
20  
21 436 associated with reporting of abuse against children and adolescents by nurses within  
22  
23 437 Primary Health Care. *Rev Lat Am Enfermagem.* 2014;22(6):1048-1055.  
24  
25 438 30. Ben Natan M, Ben Ari G, Bader T, Hallak M. Universal screening for domestic  
26  
27 439 violence in a department of obstetrics and gynaecology: a patient and carer  
28  
29 440 perspective. *Int Nurs Rev.* 2012;59(1):108-114.  
30  
31 441 31. Ben Natan M, Faour C, Naamah S, Grinberg K, Klein-Kremer A. Factors affecting  
32  
33 442 medical and nursing staff reporting of child abuse. *Int Nurs Rev.* 2012;59(3):331-337.  
34  
35 443 32. Feng J-Y, Wu Y-WB. Nurses' intention to report child abuse in Taiwan: A test of the  
36  
37 444 theory of planned behavior. *Res Nurs Health.* 2005;28(4):337-347.  
38  
39 445 33. The World Bank. Data for Arab World. Population. 2017. Available from:  
40  
41 446 <http://data.worldbank.org/?locations=1A-DZ>. Accessed June 10, 2017.  
42  
43 447 34. Rodrigues JLSA, Lima APB, Nagata JY, Rigo L, Cericato GO, Franco A, et al.  
44  
45 448 Domestic violence against children detected and managed in the routine of dentistry -  
46  
47 449 A systematic review. *J Forensic Leg Med.* 2016;43:34-41.  
48  
49  
50  
51  
52  
53  
54  
55  
56  
57  
58  
59  
60

- 1  
2  
3 450 35. Silva LO, Souza-Silva BN, de Alcântara Rodrigues JL, Rigo L, Cericato GO, Franco  
4  
5 451 A, et al. Identification and management of elder physical abuse in the routine of  
6  
7 452 dentistry - a systematic review. Gerodontology. 2017;34(1):3-12.  
8  
9  
10  
11  
12  
13  
14  
15  
16  
17  
18  
19  
20  
21  
22  
23  
24  
25  
26  
27  
28  
29  
30  
31  
32  
33  
34  
35  
36  
37  
38  
39  
40  
41  
42  
43  
44  
45  
46  
47  
48  
49  
50  
51  
52  
53  
54  
55  
56  
57  
58  
59  
60

For peer review only

1  
2  
3 453 **Authors' contribution**

- 4 454 • Maha El Tantawi, Maha Abdelsalam and Balgis Gaffar developed the study idea and questionnaire.
- 5  
6 455 • Maha El Tantawi developed the study methods.
- 7  
8 456 • Arheiam Arheiam, Wafaa AbdelAziz, Ola B. Al-Batayneh, Mansor Alhowiti, Sadeq Al-Maweri, Mai  
9  
10 457 A. Dama, Mounir Zaghez, Khalid Saddiq Hassan, Mona Al-Sane, Fatma Abdelgawad, Thiyezen  
11  
12 458 Abdullah Aldhelai, Omar Abd El Sadek El Meligy, Jehan AlHumaid and Fahad Al-Harbi collected  
13  
14 459 data.
- 15  
16 460 • Maha El Tantawi, Arheiam Arheiam and Wael Sabbah analyzed and interpreted the results.
- 17  
18 461 • Maha El Tantawi, Arheiam Arheiam, Wael Sabbah, Arwa I. Owais, Omar Abd El Sadek El Meligy,  
19  
20 462 Sadeq Al-Maweri and Wafaa AbdelAziz drafted the manuscripts.
- 21  
22 463 • All authors read and approved the final manuscript.
- 23  
24  
25  
26  
27  
28  
29  
30  
31  
32  
33  
34  
35  
36  
37  
38  
39  
40  
41  
42  
43  
44  
45  
46  
47  
48  
49  
50  
51  
52  
53  
54  
55  
56  
57  
58  
59  
60

1  
2  
3 464 **Figure legends**

4  
5 465 Figure 1: Negative perception of mandated reporting, mean (SD)= 5.3 (2.1), range= 1-10

6  
7 466 Figure 2: Professional attitude toward reporting, mean (SD)= 7.5 (1.9), range= 1-10 (\*:

8  
9 467 negatively phrased statement)

10  
11  
12  
13  
14  
15  
16  
17  
18  
19  
20  
21  
22  
23  
24  
25  
26  
27  
28  
29  
30  
31  
32  
33  
34  
35  
36  
37  
38  
39  
40  
41  
42  
43  
44  
45  
46  
47  
48  
49  
50  
51  
52  
53  
54  
55  
56  
57  
58  
59  
60

For peer review only



1  
2  
3  
4  
5  
6  
7  
8  
9  
10  
11  
12  
13  
14  
15  
16  
17  
18  
19  
20  
21  
22  
23  
24  
25  
26  
27  
28  
29  
30  
31  
32  
33  
34  
35  
36  
37  
38  
39  
40  
41  
42  
43  
44  
45  
46  
47  
48  
49  
50  
51  
52  
53  
54  
55  
56  
57  
58  
59  
60

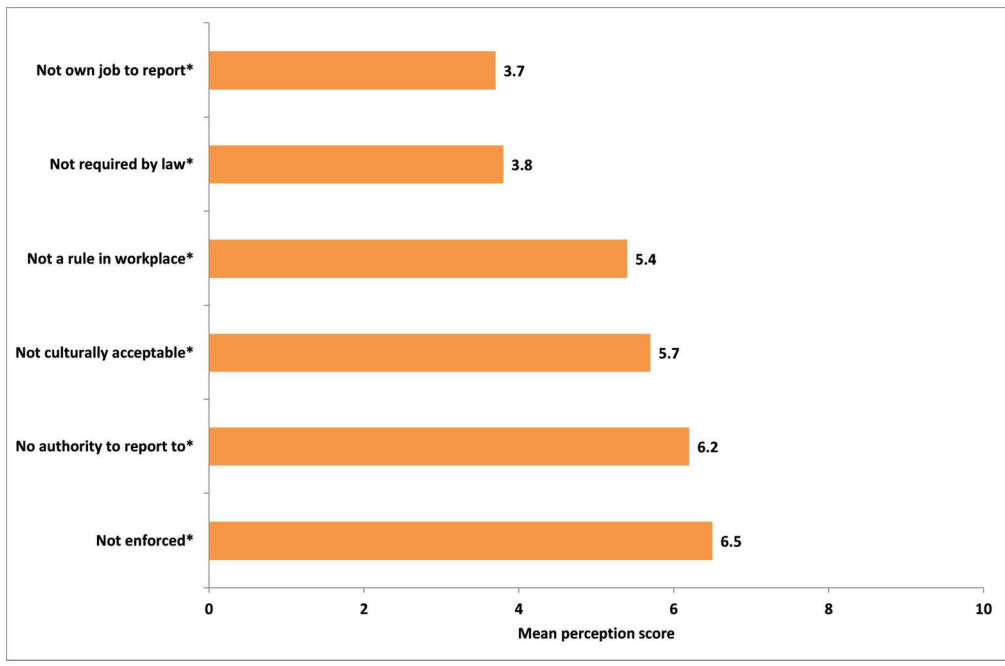

Figure 1: Negative perception of mandated reporting, mean (SD)= 5.3 (2.1), range= 1-10

168x110mm (300 x 300 DPI)

view only

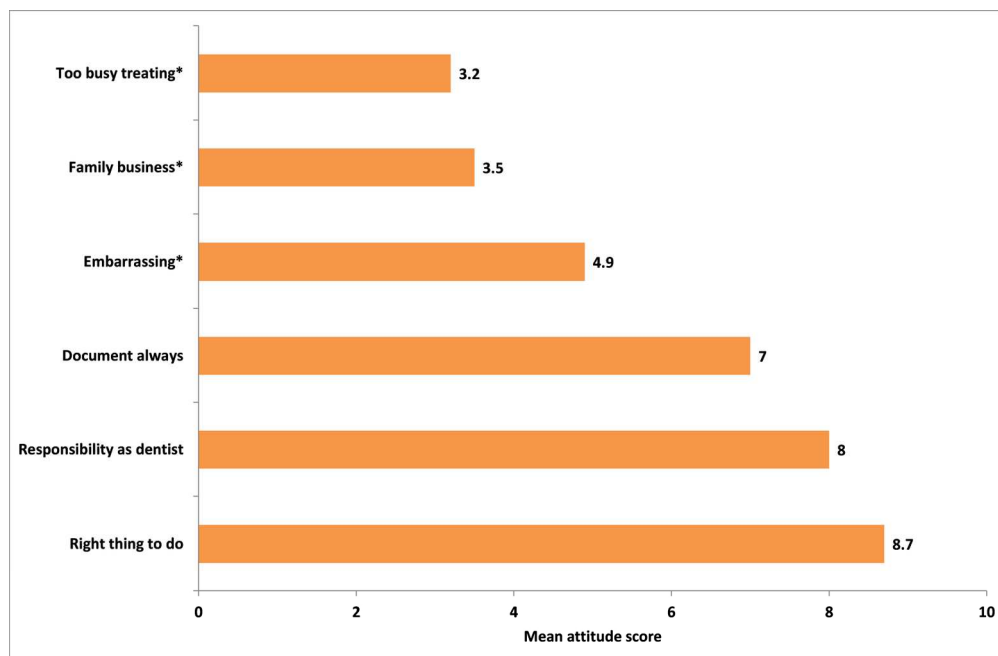

Figure 2: Professional attitude toward reporting, mean (SD)= 7.5 (1.9), range= 1-10 (\*: negatively phrased statement)

168x110mm (300 x 300 DPI)

## ABUSE MANAGEMENT IN DENTAL PRACTICE

This study is conducted to investigate the role of dentists in abuse management. The questionnaire takes 10 minutes. Kindly answer all questions. All information you provide is confidential and will only be used for research purposes.

### I- Personal Information

|                                            |                               |                                 |
|--------------------------------------------|-------------------------------|---------------------------------|
| 1. Gender                                  | <input type="checkbox"/> Male | <input type="checkbox"/> Female |
| 2. Age                                     | .....                         |                                 |
| 3. Has children                            | <input type="checkbox"/> Yes  | <input type="checkbox"/> No     |
| Nationality                                | .....                         |                                 |
| Country where you are currently practicing | .....                         |                                 |

### II- Professional background

|                                                                   |                                               |                                                 |                                                      |
|-------------------------------------------------------------------|-----------------------------------------------|-------------------------------------------------|------------------------------------------------------|
| 4. Specialization                                                 | <input type="checkbox"/> General Practitioner | <input type="checkbox"/> Specialist/ Consultant |                                                      |
| 5. Type of practice                                               | <input type="checkbox"/> Private sector       | <input type="checkbox"/> Public sector          | <input type="checkbox"/> University clinic/ hospital |
| 6. Did you have any training in abuse management?                 | <input type="checkbox"/> Yes                  | <input type="checkbox"/> No                     |                                                      |
| 7. Do you think you can identify signs of abuse in your patients? | <input type="checkbox"/> Yes                  | <input type="checkbox"/> No                     |                                                      |

### III- Perception of abuse reporting in clinical practice

How much, on a scale of **1** (not true at all) to **10** (very true), in your opinion is the following true about abuse reporting where you practice?

|                                                              |  |
|--------------------------------------------------------------|--|
| 8. Reporting abuse is not required by law.                   |  |
| 9. Reporting abuse is not enforced.                          |  |
| 10. Reporting abuse is not a rule of the place where I work. |  |
| 11. There is no specific authority to report to.             |  |
| 12. It is not my job to report abuse.                        |  |
| 13. Reporting abuse is not culturally accepted               |  |

### IV- Attitudes towards abuse reporting

Select the response that represents your attitude on a scale from **1** (completely disagree) to **10** (completely agree) for each of the following

|                                                                                          |  |
|------------------------------------------------------------------------------------------|--|
| 14. Reporting abuse is the right thing to do                                             |  |
| 15. It is my responsibility as a dentist to report abuse                                 |  |
| 16. I am too busy treating patients to report abuse                                      |  |
| 17. I would document abuse manifestations even if not relevant to treatment              |  |
| 18. If abuse is suspected within a family, it is their business; no one should interfere |  |
| 19. It is embarrassing to interfere with others to check about suspected abuse           |  |

### 20. Which of the following would be your first choice to report abuse to?

|                                                         |                                                                               |                                             |
|---------------------------------------------------------|-------------------------------------------------------------------------------|---------------------------------------------|
| <input type="checkbox"/> Police                         | <input type="checkbox"/> Social Service Agencies / Ministry of Social Affairs | <input type="checkbox"/> Ministry of Health |
| <input type="checkbox"/> Non-governmental Organizations | <input type="checkbox"/> Others (specify.....)                                | <input type="checkbox"/> I do not know      |

**STROBE 2007 (v4) Statement—Checklist of items that should be included in reports of *cross-sectional studies***

| Section/Topic                | Item # | Recommendation                                                                                                                                                                       | Reported on page # |
|------------------------------|--------|--------------------------------------------------------------------------------------------------------------------------------------------------------------------------------------|--------------------|
| Title and abstract           | 1      | (a) Indicate the study's design with a commonly used term in the title or the abstract                                                                                               | 1                  |
|                              |        | (b) Provide in the abstract an informative and balanced summary of what was done and what was found                                                                                  | 2                  |
| <b>Introduction</b>          |        |                                                                                                                                                                                      |                    |
| Background/rationale         | 2      | Explain the scientific background and rationale for the investigation being reported                                                                                                 | 5& 6               |
| Objectives                   | 3      | State specific objectives, including any prespecified hypotheses                                                                                                                     | 6                  |
| <b>Methods</b>               |        |                                                                                                                                                                                      |                    |
| Study design                 | 4      | Present key elements of study design early in the paper                                                                                                                              | 6                  |
| Setting                      | 5      | Describe the setting, locations, and relevant dates, including periods of recruitment, exposure, follow-up, and data collection                                                      | 6                  |
| Participants                 | 6      | (a) Give the eligibility criteria, and the sources and methods of selection of participants                                                                                          | 7                  |
| Variables                    | 7      | Clearly define all outcomes, exposures, predictors, potential confounders, and effect modifiers. Give diagnostic criteria, if applicable                                             | 7& 8               |
| Data sources/<br>measurement | 8*     | For each variable of interest, give sources of data and details of methods of assessment (measurement). Describe comparability of assessment methods if there is more than one group | 7& 8               |
| Bias                         | 9      | Describe any efforts to address potential sources of bias                                                                                                                            | -                  |
| Study size                   | 10     | Explain how the study size was arrived at                                                                                                                                            | 6                  |
| Quantitative variables       | 11     | Explain how quantitative variables were handled in the analyses. If applicable, describe which groupings were chosen and why                                                         | 8                  |
| Statistical methods          | 12     | (a) Describe all statistical methods, including those used to control for confounding                                                                                                | 8                  |
|                              |        | (b) Describe any methods used to examine subgroups and interactions                                                                                                                  | -                  |
|                              |        | (c) Explain how missing data were addressed                                                                                                                                          | -                  |
|                              |        | (d) If applicable, describe analytical methods taking account of sampling strategy                                                                                                   | -                  |
|                              |        | (e) Describe any sensitivity analyses                                                                                                                                                | -                  |
| <b>Results</b>               |        |                                                                                                                                                                                      |                    |
| Participants                 | 13*    | (a) Report numbers of individuals at each stage of study—eg numbers potentially eligible, examined for eligibility, confirmed                                                        | 9                  |

|                          |     |                                                                                                                                                                                                              |        |
|--------------------------|-----|--------------------------------------------------------------------------------------------------------------------------------------------------------------------------------------------------------------|--------|
|                          |     | eligible, included in the study, completing follow-up, and analysed                                                                                                                                          |        |
|                          |     | (b) Give reasons for non-participation at each stage                                                                                                                                                         | -      |
|                          |     | (c) Consider use of a flow diagram                                                                                                                                                                           | -      |
| Descriptive data         | 14* | (a) Give characteristics of study participants (eg demographic, clinical, social) and information on exposures and potential confounders                                                                     | 9& 10  |
|                          |     | (b) Indicate number of participants with missing data for each variable of interest                                                                                                                          | -      |
| Outcome data             | 15* | Report numbers of outcome events or summary measures                                                                                                                                                         | 11&12  |
| Main results             | 16  | (a) Give unadjusted estimates and, if applicable, confounder-adjusted estimates and their precision (eg, 95% confidence interval). Make clear which confounders were adjusted for and why they were included | 12& 13 |
|                          |     | (b) Report category boundaries when continuous variables were categorized                                                                                                                                    | -      |
|                          |     | (c) If relevant, consider translating estimates of relative risk into absolute risk for a meaningful time period                                                                                             | -      |
| Other analyses           | 17  | Report other analyses done—eg analyses of subgroups and interactions, and sensitivity analyses                                                                                                               | -      |
| <b>Discussion</b>        |     |                                                                                                                                                                                                              |        |
| Key results              | 18  | Summarise key results with reference to study objectives                                                                                                                                                     | 14     |
| Limitations              | 19  | Discuss limitations of the study, taking into account sources of potential bias or imprecision. Discuss both direction and magnitude of any potential bias                                                   | 17     |
| Interpretation           | 20  | Give a cautious overall interpretation of results considering objectives, limitations, multiplicity of analyses, results from similar studies, and other relevant evidence                                   | 14-17  |
| Generalisability         | 21  | Discuss the generalisability (external validity) of the study results                                                                                                                                        | 17     |
| <b>Other information</b> |     |                                                                                                                                                                                                              |        |
| Funding                  | 22  | Give the source of funding and the role of the funders for the present study and, if applicable, for the original study on which the present article is based                                                | 4      |

\*Give information separately for cases and controls in case-control studies and, if applicable, for exposed and unexposed groups in cohort and cross-sectional studies.

**Note:** An Explanation and Elaboration article discusses each checklist item and gives methodological background and published examples of transparent reporting. The STROBE checklist is best used in conjunction with this article (freely available on the Web sites of PLoS Medicine at <http://www.plosmedicine.org/>, Annals of Internal Medicine at <http://www.annals.org/>, and Epidemiology at <http://www.epidem.com/>). Information on the STROBE Initiative is available at [www.strobe-statement.org](http://www.strobe-statement.org).

1  
2  
3 **1 Dentists' intention to report suspected violence: a cross-sectional study in eight Arab**  
4  
5 **2 countries**

6  
7 3 Maha El Tantawi, Department of Preventive Dental Sciences, College of Dentistry, University of Dammam,  
8  
9 4 Dammam, Saudi Arabia; Balgis Gaffar, Department of Preventive Dental Sciences, College of Dentistry,  
10  
11 5 University of Dammam, Dammam, Saudi Arabia; Arheiam Arheiam, Department of Community and Preventive  
12  
13 6 Dentistry, Faculty of Dentistry, University of Benghazi, Benghazi, Libya; Wafaa AbdelAziz, Department of  
14  
15 7 Pediatric Dentistry and Dental Public Health, Faculty of Dentistry, Alexandria University, Alexandria, Egypt;  
16  
17 8 Ola B. Al-Batayneh, Department of Preventive Dentistry, Jordan University of Science and Technology, Irbid,  
18  
19 9 Jordan; Mansur F. Alhoti, Benghazi Psychiatric Hospital, Benghazi, Libya; Sadeq Al-Maweri, Alfarabi colleges,  
20  
21 10 Riyadh, Saudi Arabia; Mai A. Dama, Department of Paedodontics and Orthodontics, College of Dentistry, The  
22  
23 11 Arab American University, Jenin, Palestine; Mounir Zaghez, Department of Oral Medicine, Faculty of Medicine,  
24  
25 12 Annaba University (BADJI Mokhtar), Annaba, Algeria; Khalid Saddiq Hassan, Department of Oral Medicine  
26  
27 13 and Periodontology, Faculty of Dentistry, AlAzhar University, Assiut Branch, Assiut, Egypt; Mona Al-Sane,  
28  
29 14 Department of Developmental and Preventive Sciences, Faculty of Dentistry, Kuwait University, Kuwait; Maha  
30  
31 15 AbdelSalam, Department of Biomedical Dental Sciences, College of Dentistry, University of Dammam,  
32  
33 16 Dammam, Saudi Arabia; Wael Sabbah, Department of Population and Patient Health, King's College Hospital,  
34  
35 17 London, United Kingdom; Arwa I. Owais, Department of Pediatric Dentistry, College of Dentistry, University of  
36  
37 18 Iowa, Iowa, United States; Fatma Abdelgawad, Department of Pediatric Dentistry and Dental Public Health,  
38  
39 19 Faculty of Oral and Dental Medicine, Cairo University, Cairo, Egypt; Thiyezen Abdullah Aldhelai, Department  
40  
41 20 of orthodontic and Pediatric Dentistry, College of Dentistry, University of Ibb, Sanaa, Yemen; Omar Abd El  
42  
43 21 Sadek El Meligy, Department of Pediatric Dentistry, Faculty of Dentistry, King Abdulaziz University, Jeddah,  
44  
45 22 Saudi Arabia and Department of Pediatric Dentistry and Dental Public Health, Faculty of Dentistry, Alexandria  
46  
47 23 University, Alexandria, Egypt; Jehan AlHumaid, Department of Preventive Dental Sciences, College of  
48  
49 24 Dentistry, University of Dammam, Dammam, Saudi Arabia; Fahad Al-Harbi, Department of Substitutive Dental  
50  
51 25 Sciences, College of Dentistry, University of Dammam, Dammam, Saudi Arabia.

52  
53  
54  
55  
56  
57  
58  
59  
60 **27 Corresponding author**

28 Prof. Maha El Tantawi, College of Dentistry, University of Dammam, P.O. Box 1982, Dammam Coastal Road,  
29 31441 Dammam, Saudi Arabia. Phone: +966 13 8574928, ext: 216, Fax: + 966 13 8572624. Email:  
30 [maha\\_tantawy@hotmail.com](mailto:maha_tantawy@hotmail.com), [mmtantawy@iau.edu.sa](mailto:mmtantawy@iau.edu.sa), [ORCID: orcid.org/0000-0003-4989-6584](https://orcid.org/0000-0003-4989-6584)

## 31 Abstract

### 32 Objectives

33 This study assessed ~~dentists' the~~ intention ~~of dentists~~ in eight Arab countries to report  
34 suspected exposure to violence among ~~their~~ patients and factors associated with this intention  
35 based on the theory of planned behavior.

### 36 Methods

37 A cross-sectional study was conducted in 2016 including a convenience sample of dentists  
38 practicing in public, private and academic sectors in Algeria, Egypt, Jordan, Kuwait, Libya,  
39 Palestine, Saudi Arabia and Yemen. ~~Respondents were selected using a convenience sample.~~  
40 They Respondents answered a self-administered questionnaire ~~that collect~~ing information  
41 about personal and professional background and perceived ability to identify victims of  
42 violence. The questionnaire ~~also~~ assessed (on a scale from 1 to 10 using 6 negative  
43 statements) dentists' perception of healthcare system mandated reporting of suspected  
44 violence. Six ~~other~~ statements were used to assess professional attitude toward reporting  
45 suspected violence. Logistic regression ~~analysis~~ was used to assess the association between  
46 intention to report suspected violence and perceived ability, perception and attitude adjusting  
47 for confounders.

### 48 Results

49 The response rate was 65.2% (n= 2,936/ 4506) from general practitioners (70.9%) of mean  
50 age= 31 years with 56.7% females. Of those, with 68.8% intended to report and 52.2%  
51 considered themselves able to identify violence victims ~~of violence~~. The mean (SD)  
52 negative perception score= 5.3/10 (2.1) and the mean (SD) professional attitude score= 7.5/10  
53 (1.9). In multivariate regression, intention to report was associated with professional attitude  
54 (OR= 1.08, 95%CI= 1.03, 1.14), ability to identify violence victims (OR= 1.76, 95%CI=1.45,

1  
2  
3 55 2.12) and negative perception that reporting is not mandated (OR= 0.89, 95%CI=0.85, 0.94).  
4

5 56 Significant differences existed ~~between~~among countries in intention to report.  
6

7 57 **Conclusion**  
8

9 58 Most dentists intended to report suspected violence and their intention could be explained by  
10

11 59 the theory of planned behavior which offers a framework for professional development ~~so that~~  
12

13 60 ~~dentists can to~~ support violence victims ~~of violence~~. Sharing of training resources, policies  
14

15 61 and guidelines is needed to ensure that practices similar to international guidelines are  
16

17 62 consistently adopted by dentists across Arab countries.  
18  
19  
20  
21  
22  
23  
24  
25  
26  
27  
28  
29  
30  
31  
32  
33  
34  
35  
36  
37  
38  
39  
40  
41  
42  
43  
44  
45  
46  
47  
48  
49  
50  
51  
52  
53  
54  
55  
56  
57  
58  
59  
60



### 63 **Strengths and limitations**

- 64 • We included dentists from eight Arab countries which increases the geographic  
65 representativeness of our findings and fills a knowledge gap about the intended  
66 practices of dentists in this region.
- 67 • The theory of planned behavior provides a framework to explain the intention to  
68 report and helps in planning professional development activities to better prepare  
69 dentists to help their patients.
- 70 • Social desirability might have affected our estimates of dentists' intention to report  
71 suspected violence.
- 72 • Dentists in private practice were under represented compared to dentists from the  
73 public and academic sectors.

### 75 **Funding statement**

76 This research received no specific grant from any funding agency in the public,  
77 commercial or not-for-profit sectors.

### 79 **Competing interest statement**

80 None declared.

### 82 **Data sharing statement**

83 The dataset will be made available from the corresponding author.

## 84 **Introduction**

85 In 2014, the World Health Organization (WHO) issued the first report on the global  
86 status of violence prevention [1]. The report defined interpersonal violence as violence that  
87 occurs between family members, intimate partners, friends, acquaintances and strangers and  
88 includes child maltreatment, intimate partner violence and elder abuse in addition to some  
89 other forms of violence. The report showed that although the problem is preventable and  
90 efforts were already under way to reduce it, much remained to be done. Global statistics [1]  
91 indicate that most cases of violence against children, women and elderly are not reported to  
92 authorities or service providers. This emphasizes the need of the health sector to have a more  
93 active role in documenting and reporting cases of violence.

94 The Eastern Mediterranean Region which includes Arab countries has one of the  
95 highest prevalence of intimate partner violence, the most extensively surveyed of all types of  
96 violence, among the six WHO regions (37%). Comprehensive information about violence  
97 against children and the elderly is not available [1]. Arab countries are more defined by their  
98 shared culture than by being a specific race [2]. Given that what constitutes violence depends  
99 on contextual and cultural norms, what would be labelled as violence against women or  
100 children in western countries, may be culturally acceptable or may be considered a private  
101 matter in Arab countries [3]. Because of this, studies related to violence management that  
102 were conducted in western countries may not apply in Arab countries.

103 Dental care settings are often the primary contact point for violence victims since head  
104 and face injuries are sites with common manifestation of physical violence [4]. Like all health  
105 care professionals, dentists' main goal is to protect human life and the wellbeing of their  
106 patients [5] and therefore, they can play an important role in identifying and reporting victims  
107 of violence. However, we know little about Arab dentists' willingness to report cases of  
108 violence. A review of literature showed that there were few studies that were conducted

1  
2  
3 109 among dentists in Arab countries and that they focused on children abuse; in Jordan [6,7],  
4  
5 110 Saudi Arabia [8, 9] and the United Arab Emirates [10]. However, none of these studies  
6  
7 111 investigated dentists' intention to report suspicion of violence among adults.  
8

9 112 Based on the limited number of studies addressing the issue, there is a need to assess  
10  
11 113 the willingness of dentists in Arab countries to report suspected violence. Such information  
12  
13 114 helps inform public health policy, laws and future intervention programs targeting prevention  
14  
15 115 and management of violence. The hypothesis of the study was that dentists' intention to report  
16  
17 116 violence can be explained by the theory of planned behavior [11] where dentists would be  
18  
19 117 more willing to report if they perceive that the health care system requires them to report  
20  
21 118 (normative beliefs), if they have favorable professional attitude toward reporting (behavioral  
22  
23 119 beliefs) and if they think they are able to identify victims of violence (control beliefs). The  
24  
25 120 aims of this study were to 1) assess the intention of dentists in eight Arab countries to report  
26  
27 121 cases of suspected violence and to 2) identify factors associated with this intention.  
28  
29  
30  
31  
32

### 33 123 **Methods**

34  
35 124 Data for this cross-sectional study was collected from April to December 2016 after  
36  
37 125 obtaining the approval of the research ethics committee; the Research Unit in the College of  
38  
39 126 Dentistry, University of Dammam, Saudi Arabia (EA216008) and in accordance with the  
40  
41 127 guidelines of the Helsinki Declaration. Dentists were targeted in eight Arab countries;  
42  
43 128 Algeria, Egypt, Jordan, Kuwait, Libya, Palestine, Saudi Arabia and Yemen. To assess the  
44  
45 129 prevalence of intention to report, sample size was calculated  
46  
47 130 (<http://www.nss.gov.au/nss/home.nsf/pages/Sample+size+calculator>) using the following  
48  
49 131 assumptions: confidence level= 95%, confidence interval= 5%, total number of dentists in  
50  
51 132 each country [12] with an estimated percentage of reporting suspected violence= 32% [10].  
52  
53  
54  
55  
56  
57  
58  
59  
60

1  
2  
3 133 The number was increased by 25% to allow for non-response. The minimum required sample  
4  
5 134 size per country ranged from 300 to 470 dentists.

6  
7 135 Participants were selected using convenience sampling including dentists affiliated  
8  
9 136 with professional groups, or from regions where they would be clustered such as capitals and  
10  
11 137 big cities and from different areas in each country to ensure geographic coverage. Because of  
12  
13 138 the war situation in Libya, data collection was restricted only to Eastern Libya. In Algeria,  
14  
15 139 only the city of Annaba was included and the respondents were alumni of Annaba University.

16  
17 140 Dentists were invited to participate if they 1) had a bachelor of dentistry or equivalent  
18  
19 141 degree and 2) were practicing in one of the eight Arab countries. In the beginning, dentists  
20  
21 142 were included only if they were nationals of the country. Later on, this criterion was dropped  
22  
23 143 due to the presence of a considerable percentage of expats in some countries so that the  
24  
25 144 sample would reflect the profession profile in the participating countries.

26  
27  
28 145 Data was collected using a questionnaire that was developed based on previous studies  
29  
30  
31 146 [9, 10, 13] ([supplementary file](#)). It consisted of five sections including 20 close-ended  
32  
33 147 questions. The first section sought information about personal background (age in years,  
34  
35 148 gender (male or female) and having children (yes or no)). The 2<sup>nd</sup> section inquired about  
36  
37 149 professional background including specialization (general practitioner or specialist/  
38  
39 150 consultant), type of practice (private, public or academic sectors), receiving training (yes or  
40  
41 151 no) and perceived ability to identify victims of violence (yes or no). The 3<sup>rd</sup> section assessed  
42  
43 152 perception of mandated reporting of suspected violence. Participants were asked to indicate  
44  
45 153 how much they considered each of six statements was true of the place they worked on a scale  
46  
47 154 from not true at all (1) to very true (10). The statements were all negatively phrased and  
48  
49 155 indicated that reporting was not required by law, not enforced, not a rule of the place one  
50  
51 156 worked, not the dentist's job to do, not culturally acceptable and that there was no specific  
52  
53  
54 157 authority to report to. The 4<sup>th</sup> section assessed respondents' attitude toward reporting violence  
55  
56  
57  
58  
59  
60

1  
2  
3 158 using 6 statements to which they were asked to indicate agreement on a scale from completely  
4  
5 159 disagree (1) to completely agree (10). The statements indicated that reporting was the right  
6  
7 160 thing to do, was the dentist's responsibility, that the dentist would always document the  
8  
9 161 manifestations of suspected violence (positive) in addition to statements indicating that the  
10  
11 162 dentist was too busy with patients to report, that the issue of violence was a family's business  
12  
13 163 where nobody should interfere and that it was embarrassing to check about violence  
14  
15 164 (negative). In the 5<sup>th</sup> section, respondents were asked whether they would report suspected  
16  
17 165 violence to the police, social services agencies/ Ministry of Social Affairs, Ministry of Health,  
18  
19  
20 166 non- governmental organizations (NGOs) or others. The questionnaire was pilot tested and  
21  
22 167 culturally adapted in each country.  
23

24 168 The questionnaire was preceded by a brief explanation of the study purpose and  
25  
26 169 explained that by responding, the dentist indicated consent to join the study. It took about ten  
27  
28 170 minutes to complete and was self-administered, in Arabic and English, as printed and  
29  
30 171 electronic versions. A respondent received the questionnaire by hand or a link to the  
31  
32 172 electronic version was sent to an email list or by WhatsApp message. The investigator issued  
33  
34 173 three reminders over a period of three months in case of non-response.  
35  
36

#### 37 174 Analysis

38  
39 175 The internal consistency of the statements of perception and attitude was assessed  
40  
41 176 using Cronbach alpha. Overall scores of the two constructs were developed by averaging the  
42  
43 177 items' scores after reverse coding negative attitude statements. Higher perception score thus  
44  
45 178 indicated less (negative) perception so that dentists considered themselves were not mandated  
46  
47 179 to report and higher attitude score indicated more positive professional attitude. Separate  
48  
49 180 logistic regression models were developed to assess the association between intention to  
50  
51 181 report suspected violence (dichotomous outcome: yes vs no) and each of (a) perception of  
52  
53 182 mandated reporting (norms) (measured on a scale from 1 to 10), (b) professional attitude  
54  
55  
56  
57  
58  
59  
60

183 toward reporting (measured on a scale from 1 to 10) and (c) perceived ability to identify  
 184 victims of violence (control) (yes vs no) in addition to personal and professional factors (all  
 185 were categorical variables except age). Countries were considered to have protective services  
 186 for children or adults based on the WHO report whether these services were limited, partial or  
 187 full [1]. All factors were included in a multivariable model where they were simultaneously  
 188 adjusted after removing the factors whose estimates showed correlation. All models were  
 189 adjusted for country of practice. Odds ratios, 95% confidence intervals and p values were  
 190 calculated for all models and so was the percentage of correctly classified cases for the model  
 191 including all variables.

## 193 Results

194 The overall response rate was 65.2% ranging from 51% in Palestine to 78% in Yemen  
 195 (Table 1). Some nationalities practiced in their own countries and in other countries included  
 196 in the study (Egyptians 28.1% vs 29.9%, Jordanians 11.8% vs 12.6% and Yemenis 9.9% vs  
 197 10.4%). The majority of expats were from Asian (5.4%) or other Arab countries not included  
 198 in the study (3.1%). Protective services for victims of violence were not documented in  
 199 Kuwait, Libya and Palestine.

201 Table 1: Response rate, presence of protective services and intention to report by country

| Country | Response rate   | Documented presence of protective services | Intention to report<br>N (%) |
|---------|-----------------|--------------------------------------------|------------------------------|
| Algeria | 110/ 175= 62.9% | Yes                                        | 88 (80%)                     |
| Egypt   | 826/ 1271= 65%  | Yes                                        | 505 (61.1%)                  |
| Jordan  | 347/ 475= 73.1% | Yes                                        | 271 (78.1%)                  |
| Kuwait  | 449/ 632= 71%   | No                                         | 305 (67.9%)                  |

|              |                   |     |              |
|--------------|-------------------|-----|--------------|
| Libya        | 225/389= 57.8%    | No  | 159 (70.7%)  |
| Palestine    | 380/ 745= 51%     | No  | 326 (85.8%)  |
| Saudi Arabia | 308/ 446= 69.1%   | Yes | 190 (61.7%)  |
| Yemen        | 291/ 373= 78%     | Yes | 175 (60.1%)  |
| Total        | 2936/ 4506= 65.2% |     | 2019 (68.8%) |

202

203 The mean (SD) age in years was 31.0 (9.2), 56.7% were females and 53.7% had no  
 204 children (Table 2). Most respondents were general practitioners (70.9%) working in the public  
 205 (43.9%) or private sectors (34.2%). Only 19.3% reported receiving training to manage victims  
 206 of violence and 52.2% claimed that they can identify them. Protective services for victims of  
 207 violence were present in the countries of practice of 64.1% of the respondents.

208

209 Table 2: Personal and professional background of participants

| Factor                                            |                        | N (%)        |
|---------------------------------------------------|------------------------|--------------|
| Age                                               | Mean (SD)              | 31.0 (9.2)   |
| Gender                                            | Male                   | 1268 (43.3%) |
|                                                   | Female                 | 1659 (56.7%) |
| Has no children                                   |                        | 1571 (53.7%) |
| Specialization                                    | General practitioner   | 2047 (70.9%) |
|                                                   | Specialist/ Consultant | 839 (29.1%)  |
| Type of practice                                  | Private sector         | 976 (34.2%)  |
|                                                   | Public sector          | 1257 (43.9%) |
|                                                   | Academic sector        | 623 (21.9%)  |
| Received training                                 |                        | 565 (19.3%)  |
| Perceived ability to identify victims of violence |                        | 1445 (52.2%) |

|                                                                               |              |
|-------------------------------------------------------------------------------|--------------|
| Presence of protective services for children or adults in country of practice | 1882 (64.1%) |
|-------------------------------------------------------------------------------|--------------|

210

211 The majority of respondents indicated their intention to report suspected violence  
 212 (2019, 68.8%); mainly to the police (933, 31.8%), or social affairs agencies (842, 28.7%)  
 213 followed by the Ministry of Health (303, 10.3%) and NGOs (132, 4.5%). There was a  
 214 significant difference among countries in the percentage of dentists indicating intention to  
 215 report ranging from 60.1% in Yemen to 85.8% in Palestine ( $P < 0.0001$ , Table 1).

216 Figure 1 shows that the highest mean negative perception item score was for  
 217 perceiving that reporting was not enforced (6.5) followed by perceiving that there was no  
 218 authority to report to (6.2). The internal consistency of perception statements was acceptable  
 219 (Cronbach alpha = 0.68, 95% CI= 0.66, 0.70,  $P < 0.0001$ ) and the mean (SD) equals 5.3 (2.1).  
 220 The highest mean score for statements of attitude toward reporting (Figure 2) was for  
 221 indicating that it was the right thing to do (8.7) and the lowest was for the negative statement  
 222 indicating that the respondent was too busy treating patients to report (mean= 3.2). The  
 223 internal consistency of the statements was good (Cronbach alpha = 0.72, 95% CI= 0.70, 0.74,  
 224  $P < 0.0001$ ) and the mean (SD) equals 7.5 (1.9).

225 Dentists who practiced in countries where there were protective services for violence  
 226 victims had significantly higher negative perception and lower attitude scores than those  
 227 without such services ( $P < 0.0001$  and 0.02). Dentists who reported being able to identify  
 228 violence victims had significantly lower negative perception and higher attitude scores than  
 229 those who did not ( $P < 0.0001$ , Table 3). There was a significant moderate negative correlation  
 230 between perception and professional attitude (Pearson  $r = -0.32$ ,  $P < 0.0001$ ).

231

232



233 Table 3: Association of perception and attitude with presence of protective services and  
 234 ability to identify victims of violence

|                                | Score: mean (SD)                           |                                               | P value  |
|--------------------------------|--------------------------------------------|-----------------------------------------------|----------|
|                                | Protective services in country of practice | No protective services in country of practice |          |
| Negative perception            | 5.50 (2.13)                                | 4.87 (2.11)                                   | <0.0001* |
| Positive professional attitude | 7.41 (1.94)                                | 7.59 (1.87)                                   | 0.02*    |
|                                | Able to identify victims of violence       | Not able to identify victims of violence      |          |
| Negative perception            | 4.98 (2.17)                                | 5.56 (2.06)                                   | <0.0001* |
| Positive professional attitude | 7.72 (1.85)                                | 7.25 (1.99)                                   | <0.0001* |

235 \*: statistically significant at  $P < 0.05$

236

237 Table 4 shows that attitude, perception and reported ability to identify violence  
 238 victims were significantly associated ( $P < 0.0001$ ) with intention to report in the separate  
 239 models (model 1) in addition to gender ( $P < 0.0001$ ), age ( $P = 0.004$ ) and presence of  
 240 protective services ( $P < 0.0001$ ). In the multivariable model 2, higher odds of intention to  
 241 report were significantly associated with higher professional attitude score (OR= 1.08, 95%  
 242 CI= 1.03, 1.14) and reported ability to identify victims of violence (OR= 1.76, 95% CI= 1.45,  
 243 2.12). Lower odds of intended reporting were significantly associated with higher score of  
 244 negative perception (OR= 0.89, 95% CI= 0.85, 0.94). In addition, the presence of protective  
 245 services was associated with significantly lower odds of intention to report (OR= 0.34, 95%  
 246 CI= 0.22, 0.50). The multivariable model 2 correctly classified 71.6% of dentists based on  
 247 intention to report suspected violence.

248

249

250 Table 4: Factors associated with intention to report suspected violence

| Factors                                                       | Model 1            |          | Model 2           |          |
|---------------------------------------------------------------|--------------------|----------|-------------------|----------|
|                                                               | OR (95% CI)        | P value  | OR (95% CI)       | P value  |
| Higher attitude score by one point                            | 1.10 (1.06, 1.15)  | <0.0001* | 1.08 (1.03, 1.14) | 0.002*   |
| Higher negative perception score by one point                 | 0.88 (0.84, 0.92)  | <0.0001* | 0.89 (0.85, 0.94) | <0.0001* |
| Ability to identify victims of violence vs not                | 1.80 (1.52, 2.14)  | <0.0001* | 1.76 (1.45, 2.12) | <0.0001* |
| Male vs female                                                | 1.74 (1.47, 2.06)* | <0.0001* | 1.85 (1.52, 2.25) | <0.0001* |
| Older dentist by one year                                     | 1.01 (1.004, 1.02) | 0.004*   | 1.01 (0.99, 1.02) | 0.36     |
| Has children vs does not have children                        | 1.14 (0.97, 1.35)  | 0.12     | -                 | -        |
| General practitioner vs specialist/ consultant                | 0.99 (0.83, 1.19)  | 0.93     | -                 | -        |
| Working in public vs private sector                           | 0.95 (0.77, 1.18)  | 0.66     | 1.11 (0.87, 1.42) | 0.40     |
| Working in academic vs private sector                         | 0.83 (0.66, 1.05)  | 0.11     | 0.88 (0.68, 1.15) | 0.37     |
| Presence of protective services in country of practice vs not | 0.25 (0.17, 0.36)  | <0.0001* | 0.34 (0.22, 0.50) | <0.0001* |

251 Model 1: includes individual factors adjusted for country of practice

252 Model 2: includes all factors adjusted for country of practice

1  
2  
3 253 OR: odds ratio, CI: confidence interval, \*: statistically significant at  $P < 0.05$ . Percent  
4  
5 254 correctly classified by multivariable model: 71.6%.

6  
7 255

8  
9 256 **Discussion**

10  
11 257 Our results indicated a moderate level of dentists' intention to report suspected  
12  
13 258 violence with significant difference among the eight Arab countries. The findings supported  
14  
15 259 the hypothesis and showed that the theory of planned behavior [11] correctly classified most  
16  
17 260 dentists regarding their intention to report suspected violence. A combination of dentist's  
18  
19 261 professional attitude, perceived ability to identify victims of violence and perception of  
20  
21 262 mandatory rules and regulation were associated with intention to report. The presence of  
22  
23 263 protective services in the country of practice was associated with less intention to report.

24  
25 264 Most dentists in the present study (68.8%) indicated they intended to report violence.  
26  
27 265 This finding is similar to those of previous studies in Arab countries such as Jordan [6] and  
28  
29 266 Saudi Arabia [8,9] and western countries such as Scotland [14] and Brazil [15]. However, less  
30  
31 267 intention to report was shown in some studies from Italy [16], Brazil [17] and France [5].

32  
33 268 Even with the most favorable intentions, dentists will not report violence if they  
34  
35 269 cannot identify its signs. In the present study, 52.2% of the respondents reported being able to  
36  
37 270 identify victims of violence. Previous studies showed differences in dentists' perceived ability  
38  
39 271 to identify victims of violence across countries [5,6, 8, 16-18] which might be attributed to  
40  
41 272 variations in training requirements and opportunities across countries.

42  
43 273 Our definition of subjective norms was based on dentists' perception of mandated  
44  
45 274 reporting in the workplace. We used this definition instead of focusing on significant others  
46  
47 275 since the mobility of dentists across countries meant that the values shared by these others  
48  
49 276 may differ from those prevailing in country of practice. The approach we followed was  
50  
51 277 similar to the definition of Ben Natan et al [19] where they focused on those who educated  
52  
53  
54  
55  
56  
57  
58  
59  
60

1  
2  
3 278 nursing students. In the present study, the mean score of negative perception was 5.3/ 10  
4  
5 279 indicating that, on average, no clear message was received by dentists from their work place  
6  
7 280 whether or not to report suspected violence. This was more because dentists felt the law was  
8  
9 281 not enforced than their perception that reporting was not mandated (mean = 6.5 and 3.8). This  
10  
11 282 agrees with Adair et al [20] who concluded that the likelihood of intending to report suspected  
12  
13 283 violence was greater if dentists recognized that they were legally mandated to report.  
14  
15 284 Negative perception in the current study was also related to perceiving that there was no  
16  
17 285 authority to report to and the absence of clear rules. Similar perceptions were reported in  
18  
19 286 previous studies addressing child abuse in Arab countries such as Saudi Arabia [8,9] and in  
20  
21 287 other countries including India [13], United States [21], Brazil [15] and Northern Ireland [22].  
22  
23 288 This inadequate knowledge of how or who to report to might be due to the presence of several  
24  
25 289 potential recipients of violence reports [10] or recent enactment of laws [9].

26  
27  
28  
29 290 In the present study, the presence of protective services was associated with lower  
30  
31 291 odds of intention to report (OR= 0.34), greater negative perception and less positive  
32  
33 292 professional attitude. This might be attributed to dentists not perceiving these services as  
34  
35 293 indicative of real change in social and cultural norms or health care system perspective  
36  
37 294 regarding reporting. Alternatively, they might have considered that care of violence victims  
38  
39 295 was shifted to these services so that they would be ethically justified not to report violence.  
40  
41 296 However, studies using qualitative research techniques are needed for further investigation.

42  
43  
44 297 In our study, respondents had positive professional attitude toward reporting violence  
45  
46 298 (mean= 7.5/ 10) which agrees with previous studies from Saudi Arabia concerning reporting  
47  
48 299 suspected child abuse [9] and domestic violence [23]. It also agrees with the positive attitude  
49  
50 300 expressed by dentists toward their role in managing child abuse in India [24], Scotland [14],  
51  
52 301 Jordan [6], Brazil [18] and Greece [25] as well as domestic violence reporting in Brazil [15],  
53  
54 302 India [26] and France [5]. Such positive professional attitude - similar to dentists' attitude in

1  
2  
3 303 other countries- might differ from some negative attitudes and practices in Arab societies that  
4  
5 304 are seen in violence statistics [1]. The predominance of professional attitude over societal  
6  
7 305 practices agrees with a study showing that cultural differences between Arab and Jewish  
8  
9 306 nursing students in Israel did not affect the intention to screen for domestic violence due to  
10  
11 307 the similarity of their education [19]. It also agrees with a study from Taiwan, a country with  
12  
13 308 eastern cultural values, which showed that nurses did not accept the cultural belief that  
14  
15 309 parents can physically discipline their children because these nurses were exposed to mixed  
16  
17 310 cultural influences from the east and west [27]. The young age of nurses in that study was  
18  
19 311 similar to that of our participants and might explain the similarity between the two studies.  
20  
21 312 However, the professional attitude in our study disagrees with Usta et al [28] who reported  
22  
23 313 that Lebanese physicians considered domestic violence a social problem not a medical one  
24  
25 314 and were ready to intervene only when there was actual physical injury. The difference  
26  
27 315 between that study and ours might be because most of the physicians were in private practice  
28  
29 316 and more likely to be worried about the implications on practice income if their local  
30  
31 317 community resented their intervention. Most of the participants in our study, on the other  
32  
33 318 hand, were in the public or academic sectors.

34  
35  
36  
37 319 Female dentists in our study were less likely to intend reporting suspected violence.  
38  
39 320 The impact of dentist gender in the issue of suspected violence varied among studies. At the  
40  
41 321 level of knowledge of rules and regulation, female dentists in Saudi Arabia were better than  
42  
43 322 males [9]. However, actual reporting of suspected violence was more likely among male  
44  
45 323 dentists in Jordan [7]. Similarly, among Brazilian nurses, of whom 86% were female, under-  
46  
47 324 reporting of violence was noticed and was attributed to conforming to cultural norms [29].  
48  
49 325 Future studies using qualitative research techniques may help elucidate this gender difference  
50  
51 326 and whether it is due to cultural expectations of how females- including dentists- should act or  
52  
53 327 because they are less involved with victims of violence.  
54  
55  
56  
57  
58  
59  
60

1  
2  
3 328 In our study, the theory of planned behavior correctly classified most dentists based on  
4  
5 329 intention to report violence. Previously, the theory predicted the intention of 28% of Israeli  
6  
7 330 nurses to report child abuse [30, 31] and 32% of their intention to screen for domestic  
8  
9 331 violence where attitudes and subjective norms were significant predictors (regression  
10  
11 332 coefficients= 0.15 and 0.05) [19]. Similarly, Feng and Wu [32] explained Taiwanese nurses'  
12  
13 333 intention to report child abuse using the same theory. Greater association with the outcome  
14  
15 334 was attributed to professional attitude than subjective norms. The least impact was for  
16  
17 335 perceived control which was attributed to the inadequate instructions of how to report.

18  
19  
20 336 There are some limitations to this study that should be considered. We assessed the  
21  
22 337 intention to report which might differ from actual reporting [5] and future studies are needed  
23  
24 338 to assess these differences. Self-reporting and social desirability could have affected our  
25  
26 339 estimates of intention to report. We also assessed the intention to report regardless of the type  
27  
28 340 of violence (physical, verbal or otherwise) or victim background (age or gender) and there is a  
29  
30 341 need to investigate how these factors might affect the intention to report. In addition, our  
31  
32 342 estimate of intention to report might have been affected by the under representation of dentists  
33  
34 343 in private practice compared to those in the public and academic sectors. Our results need to  
35  
36 344 be interpreted with caution due to the convenience sample we used.  
37  
38  
39  
40  
41

## 42 346 **Conclusions**

43  
44 347 Our study included about 3,000 dentists out of 59.5 thousand dentists [12] (5%) caring  
45  
46 348 for 213 million in eight Arab countries [33]. Their intention to report violence was associated  
47  
48 349 with professional attitudes, perceptions and perceived abilities which were similar to those of  
49  
50 350 dentists in other countries [34, 35] but never the less, showed differences by country of  
51  
52 351 practice. Our findings have implications for training to improve the reporting of suspected  
53  
54 352 violence by developing dentists' abilities to identify diagnostic signs, fostering favorable  
55  
56  
57  
58  
59  
60

1  
2  
3  
4  
5  
6  
7  
8  
9  
10  
11  
12  
13  
14  
15  
16  
17  
18  
19  
20  
21  
22  
23  
24  
25  
26  
27  
28  
29  
30  
31  
32  
33  
34  
35  
36  
37  
38  
39  
40  
41  
42  
43  
44  
45  
46  
47  
48  
49  
50  
51  
52  
53  
54  
55  
56  
57  
58  
59  
60

353 attitude and increasing awareness of already existing rules and regulations. There is a need to  
354 develop shared training resources, policies and clear guidelines that allow consistent  
355 professional practices and at the same time acknowledge cultural diversity across countries.

For peer review only

356 **References**

- 357 1. World Health Organization. Global status report on violence prevention 2014.  
358 Available from:  
359 [http://www.who.int/violence\\_injury\\_prevention/violence/status\\_report/2014/en/](http://www.who.int/violence_injury_prevention/violence/status_report/2014/en/).  
360 Accessed June 10, 2017.
- 361 2. Obeidat BY, Shannak RO, Masa'deh RT, Al-Jarrah IM. Toward better understanding  
362 for Arabian culture: Implications based on Hofstede's cultural model. *Eur J Soc Sci*.  
363 2012;28(4):512-522.
- 364 3. Douki S, Nacef F, Belhadj A, Bouasker A, Ghachem R. Violence against women in  
365 Arab and Islamic countries. *Arch Womens Ment Health*. 2003;6(3):165-171.
- 366 4. Coulthard P, Warburton AL. The role of the dental team in responding to domestic  
367 violence. *Br Dent J*. 2007;203(11):645-648.
- 368 5. Drigeard C, Nicolas E, Hansjacob A, Roger-Leroi V. Educational needs in the field of  
369 detection of domestic violence and neglect: the opinion of a population of French  
370 dentists. *Eur J Dent Educ*. 2012;16(3):156-165.
- 371 6. Owais AIN, Qudeimat MA, Qodceih S. Dentists' involvement in identification and  
372 reporting of child physical abuse: Jordan as a case study. *Int J Paediatr Dent*.  
373 2009;19(4):291-296.
- 374 7. Sonbol HN, Abu-Ghazaleh S, Rajab LD, Baqain ZH, Saman R, Al-Bitar ZB.  
375 Knowledge, educational experiences and attitudes towards child abuse amongst  
376 Jordanian dentists. *Eur J Dent Educ*. 2012;16(1):e158-e165.
- 377 8. Al-Dabaan R, Newton JT, Asimakopoulou K. Knowledge, attitudes, and experience of  
378 dentists living in Saudi Arabia toward child abuse and neglect. *Saudi Dent J*.  
379 2014;26(3):79-87.



- 1  
2  
3 380 9. Mogaddam M, Kamal I, Merdad L, Alamoudi N. Knowledge, attitudes, and behaviors  
4  
5 381 of dentists regarding child physical abuse in Jeddah, Saudi Arabia. *Child Abuse Negl.*  
6  
7 382 2016;54:43-56.
- 8  
9 383 10. Al-Amad SH, Awad MA, Al-Farsi LH, Elkhaled RH. Reporting child abuse cases by  
10  
11 384 dentists working in the United Arab Emirates (UAE). *J Forensic Leg Med.*  
12  
13 385 2016;40:12-15.
- 14  
15 386 11. Ajzen I. From intentions to actions: A theory of planned behavior. In: *Action control.*  
16  
17 387 Berlin, Heidelberg: Springer Berlin Heidelberg; 1985:11-39.
- 18  
19 388 12. World Health Organization: Global Health Observatory data repository. Dentistry  
20  
21 389 personnel - Data by country. World Health Organization. 2017. Available from:  
22  
23 390 <http://apps.who.int/gho/data/node.main.HWF2?lang=en>. Accessed June 10, 2017.
- 24  
25 391 13. Deshpande A, Macwan C, Poonacha K, Bargale S, Dhillon S, Porwal P. Knowledge  
26  
27 392 and attitude in regards to physical child abuse amongst medical and dental residents of  
28  
29 393 central Gujarat: A cross-sectional survey. *J Indian Soc Pedod Prev Dent.*  
30  
31 394 2015;33(3):177-182.
- 32  
33 395 14. Harris CM, Welbury R, Cairns AM. The Scottish dental practitioner's role in  
34  
35 396 managing child abuse and neglect. *Br Dent J.* 2013;214(9):E24.
- 36  
37 397 15. Garbin C, Rovida T, Costa AA, Garbin A. Perceptions and attitudes of public health  
38  
39 398 service dentists in the face of family violence in 24 municipalities in the state of São  
40  
41 399 Paulo, Brazil, 2013-2014. *Epidemiol Serv Saude.* 2016;25(1):1-10.
- 42  
43 400 16. Manea S, Favero GA, Stellini E, Romoli L, Mazzucato M, Facchin P. Dentists'  
44  
45 401 perceptions, attitudes, knowledge, and experience about child abuse and neglect in  
46  
47 402 northeast Italy. *J Clin Pediatr Dent.* 2007;32(1):19-25.
- 48  
49  
50  
51  
52  
53  
54  
55  
56  
57  
58  
59  
60

- 1  
2  
3 403 17. El Sarraf MC, Marego G, Correr GM, Pizzatto E, Losso EM. Physical child abuse:  
4  
5 404 perception, diagnosis, and management by Southern Brazilian pediatric dentists.  
6  
7 405 *Pediatr Dent.* 34(4):e72-76.  
8  
9 406 18. Azevedo MS, Goettems ML, Brito A, Possebon AP, Domingues J, Demarco FF, et al.  
10  
11 407 Child maltreatment: a survey of dentists in southern Brazil. *Braz Oral Res.* 26(1):5-11.  
12  
13 408 19. Ben Natan M, Khater M, Ighbariyea R, Herbet H. Readiness of nursing students to  
14  
15 409 screen women for domestic violence. *Nurse Educ Today.* 2016;44:98-102.  
16  
17 410 20. Adair SM, Yasrebi S, Wray IA, Hanes CM, Sams DR, Russell CM. Demographic,  
18  
19 411 educational, and experiential factors associated with dentists' decisions to report  
20  
21 412 hypothetical cases of child maltreatment. *Pediatr Dent.* 19(8):466-469.  
22  
23 413 21. Thomas JE, Straffon L, Inglehart MR. Knowledge and professional experiences  
24  
25 414 concerning child abuse: an analysis of provider and student responses. *Pediatr Dent.*  
26  
27 415 28(5):438-444.  
28  
29 416 22. Lazenbatt A, Freeman R. Recognizing and reporting child physical abuse: a survey of  
30  
31 417 primary healthcare professionals. *J Adv Nurs.* 2006;56(3):227-236.  
32  
33 418 23. AlAlyani W, Alshouibi E. Dentists' awareness and action towards domestic violence  
34  
35 419 patients. A cross-sectional study among dentists in Western Saudi Arabia. *Saudi Med*  
36  
37 420 *J.* 2017;38(1):82-88.  
38  
39 421 24. Malpani S, Arora J, Diwaker G, Kaleka PK, Parey A, Bontala P. Child abuse and  
40  
41 422 neglect: Do we know enough? A cross-sectional study of knowledge, attitude, and  
42  
43 423 behavior of dentists regarding child abuse and neglect in Pune, India. *J Contemp Dent*  
44  
45 424 *Pract.* 2017;18(2):162-169.  
46  
47 425 25. Laud A, Gizani S, Maragkou S, Welbury R, Papagiannoulis L. Child protection  
48  
49 426 training, experience, and personal views of dentists in the prefecture of Attica, Greece.  
50  
51 427 *Int J Paediatr Dent.* 2013;23(1):64-71.  
52  
53  
54  
55  
56  
57  
58  
59  
60

- 1  
2  
3 428 26. Mythri H, Kashinath KR, Raju AS, Suresh K V, Bharateesh J V. Enhancing the dental  
4  
5 429 professional's responsiveness towards domestic violence; A cross-sectional study. J  
6  
7 430 Clin Diagnostic Res. 2015;9(6):ZC51-ZC53.  
8  
9 431 27. Feng J-Y, Levine M. Factors associated with nurses' intention to report child abuse: A  
10  
11 432 national survey of Taiwanese nurses. Child Abuse Negl. 2005;29(7):783-795.  
12  
13 433 28. Usta J, Feder G, Antoun J. Attitudes towards domestic violence in Lebanon: a  
14  
15 434 qualitative study of primary care practitioners. Br J Gen Pract. 2014;64(623):e313-  
16  
17 435 e320.  
18  
19 436 29. Rolim ACA, Moreira GAR, Gondim SMM, Paz S da S, Vieira LJE de S. Factors  
20  
21 437 associated with reporting of abuse against children and adolescents by nurses within  
22  
23 438 Primary Health Care. Rev Lat Am Enfermagem. 2014;22(6):1048-1055.  
24  
25 439 30. Ben Natan M, Ben Ari G, Bader T, Hallak M. Universal screening for domestic  
26  
27 440 violence in a department of obstetrics and gynaecology: a patient and carer  
28  
29 441 perspective. Int Nurs Rev. 2012;59(1):108-114.  
30  
31 442 31. Ben Natan M, Faour C, Naamhah S, Grinberg K, Klein-Kremer A. Factors affecting  
32  
33 443 medical and nursing staff reporting of child abuse. Int Nurs Rev. 2012;59(3):331-337.  
34  
35 444 32. Feng J-Y, Wu Y-WB. Nurses' intention to report child abuse in Taiwan: A test of the  
36  
37 445 theory of planned behavior. Res Nurs Health. 2005;28(4):337-347.  
38  
39 446 33. The World Bank. Data for Arab World. Population. 2017. Available from:  
40  
41 <http://data.worldbank.org/?locations=1A-DZ>. Accessed June 10, 2017.  
42  
43 447  
44  
45 448 34. Rodrigues JLSA, Lima APB, Nagata JY, Rigo L, Cericato GO, Franco A, et al.  
46  
47 Domestic violence against children detected and managed in the routine of dentistry -  
48  
49 A systematic review. J Forensic Leg Med. 2016;43:34-41.  
50  
51  
52  
53  
54  
55  
56  
57  
58  
59  
60

1  
2  
3 451 | 33-35. Silva LO, Souza-Silva BN, de Alcântara Rodrigues JL, Rigo L, Cericato  
4  
5 452 | GO, Franco A, et al. Identification and management of elder physical abuse in the  
6  
7 453 | routine of dentistry - a systematic review. Gerodontology. 2017;34(1):3-12.  
8  
9  
10  
11  
12  
13  
14  
15  
16  
17  
18  
19  
20  
21  
22  
23  
24  
25  
26  
27  
28  
29  
30  
31  
32  
33  
34  
35  
36  
37  
38  
39  
40  
41  
42  
43  
44  
45  
46  
47  
48  
49  
50  
51  
52  
53  
54  
55  
56  
57  
58  
59  
60

For peer review only

1  
2  
3 454 **Authors' contribution**

- 4  
5 455 • Maha El Tantawi, Maha Abdelsalam and Balgis Gaffar developed the study idea and questionnaire.  
6  
7 456 • Maha El Tantawi developed the study methods.  
8  
9 457 • Arheiam Arheiam, Wafaa AbdelAziz, Ola B. Al-Batayneh, Mansor Alhowiti, Sadeq Al-Maweri, Mai  
10 458 A. Dama, Mounir Zaghez, Khalid Saddiq Hassan, Mona Al-Sane, Fatma Abdelgawad, Thiyezen  
11  
12 459 Abdullah Aldhelai, Omar Abd El Sadek El Meligy, Jehan AlHumaid and Fahad Al-Harbi collected  
13  
14 460 data.  
15  
16 461 • Maha El Tantawi, Arheiam Arheiam and Wael Sabbah analyzed and interpreted the results.  
17  
18 462 • Maha El Tantawi, Arheiam Arheiam, Wael Sabbah, Arwa I. Owais, Omar Abd El Sadek El Meligy,  
19 463 Sadeq Al-Maweri and Wafaa AbdelAziz drafted the manuscripts.  
20  
21 464 • All authors read and approved the final manuscript.  
22  
23  
24  
25  
26  
27  
28  
29  
30  
31  
32  
33  
34  
35  
36  
37  
38  
39  
40  
41  
42  
43  
44  
45  
46  
47  
48  
49  
50  
51  
52  
53  
54  
55  
56  
57  
58  
59  
60

1  
2  
3 465 **Figure legends**

4  
5 466 Figure 1: Negative perception of mandated reporting, mean (SD)= 5.3 (2.1), range= 1-10

6  
7 467 Figure 2: Professional attitude toward reporting, mean (SD)= 7.5 (1.9), range= 1-10 (\*:

8  
9 468 negatively phrased statement)

10  
11  
12  
13  
14  
15  
16  
17  
18  
19  
20  
21  
22  
23  
24  
25  
26  
27  
28  
29  
30  
31  
32  
33  
34  
35  
36  
37  
38  
39  
40  
41  
42  
43  
44  
45  
46  
47  
48  
49  
50  
51  
52  
53  
54  
55  
56  
57  
58  
59  
60

For peer review only

# BMJ Open

## Dentists' intention to report suspected violence: a cross-sectional study in eight Arab countries

|                                 |                                                                                                                                                                                                                                                                                                                                                                                                                                                                                                                                                                                                                                                                                                                                                                                                                                                                                                                                                                                                                                                                                                                                                                                                                                                                                                                                                                                                                                                                                                                                                                                                                                                                                                                                               |
|---------------------------------|-----------------------------------------------------------------------------------------------------------------------------------------------------------------------------------------------------------------------------------------------------------------------------------------------------------------------------------------------------------------------------------------------------------------------------------------------------------------------------------------------------------------------------------------------------------------------------------------------------------------------------------------------------------------------------------------------------------------------------------------------------------------------------------------------------------------------------------------------------------------------------------------------------------------------------------------------------------------------------------------------------------------------------------------------------------------------------------------------------------------------------------------------------------------------------------------------------------------------------------------------------------------------------------------------------------------------------------------------------------------------------------------------------------------------------------------------------------------------------------------------------------------------------------------------------------------------------------------------------------------------------------------------------------------------------------------------------------------------------------------------|
| Journal:                        | <i>BMJ Open</i>                                                                                                                                                                                                                                                                                                                                                                                                                                                                                                                                                                                                                                                                                                                                                                                                                                                                                                                                                                                                                                                                                                                                                                                                                                                                                                                                                                                                                                                                                                                                                                                                                                                                                                                               |
| Manuscript ID                   | bmjopen-2017-019786.R2                                                                                                                                                                                                                                                                                                                                                                                                                                                                                                                                                                                                                                                                                                                                                                                                                                                                                                                                                                                                                                                                                                                                                                                                                                                                                                                                                                                                                                                                                                                                                                                                                                                                                                                        |
| Article Type:                   | Research                                                                                                                                                                                                                                                                                                                                                                                                                                                                                                                                                                                                                                                                                                                                                                                                                                                                                                                                                                                                                                                                                                                                                                                                                                                                                                                                                                                                                                                                                                                                                                                                                                                                                                                                      |
| Date Submitted by the Author:   | 22-Jan-2018                                                                                                                                                                                                                                                                                                                                                                                                                                                                                                                                                                                                                                                                                                                                                                                                                                                                                                                                                                                                                                                                                                                                                                                                                                                                                                                                                                                                                                                                                                                                                                                                                                                                                                                                   |
| Complete List of Authors:       | <p>El Tantawi, Maha; University of Dammam, Department of Preventive Dental Sciences<br/> Gaffar, Balgis; University of Dammam, Department of Preventive Dental Sciences<br/> Arheiam, Arheiam; University of Benghazi, Department of Community and Preventive Dentistry<br/> AbdelAziz, Wafaa; Alexandria University, Department of Pediatric Dentistry and Dental Public Health<br/> Al-Batayneh, Ola; Jordan University of Science and Technology, Department of Preventive Dentistry<br/> Alhowiti, Mansor ; Benghazi Psychiatric Hospital<br/> Al-Maweri, Sadeq ; Al-Farabi College<br/> Dama, Mai; Arab American University, Department of Paedodontics and Orthodontics<br/> Zaghez, Mounir ; Universite Badji Mokhtar Annaba, Department of Oral Medicine<br/> Hassan, Khalid ; Al-Azhar University - Assiut Branch, Department of Oral Medicine and Periodontology<br/> Al-Sane, Mona ; Kuwait University, Department of Developmental and Preventive Sciences<br/> AbdelSalam, Maha ; University of Dammam, Department of Biomedical Dental Sciences<br/> Sabbah, Wael; King's College London,<br/> Owais, Arwa ; University of Iowa , Department of Pediatric Dentistry<br/> Abdelgawad , Fatma ; Cairo University, Department of Pediatric Dentistry and Dental Public Health<br/> Aldhelai, Thiyezen ; Ibb University, Department of Orthodontic and Pediatric Dentistry<br/> El Meligy, Omar ; King Abdulaziz University, Department of Pediatric Dentistry; Alexandria University, Department of Pediatric Dentistry and Dental Public Health<br/> AlHumaid, Jehan ; University of Dammam, Department of Preventive Dental Sciences<br/> Al-Harbi, Fahad ; University of Dammam, Department of Substitutive Dental Sciences</p> |
| <b>Primary Subject Heading</b>: | Dentistry and oral medicine                                                                                                                                                                                                                                                                                                                                                                                                                                                                                                                                                                                                                                                                                                                                                                                                                                                                                                                                                                                                                                                                                                                                                                                                                                                                                                                                                                                                                                                                                                                                                                                                                                                                                                                   |
| Secondary Subject Heading:      | Ethics, Global health, Public health                                                                                                                                                                                                                                                                                                                                                                                                                                                                                                                                                                                                                                                                                                                                                                                                                                                                                                                                                                                                                                                                                                                                                                                                                                                                                                                                                                                                                                                                                                                                                                                                                                                                                                          |
| Keywords:                       | International health services < HEALTH SERVICES ADMINISTRATION &                                                                                                                                                                                                                                                                                                                                                                                                                                                                                                                                                                                                                                                                                                                                                                                                                                                                                                                                                                                                                                                                                                                                                                                                                                                                                                                                                                                                                                                                                                                                                                                                                                                                              |

1  
2  
3  
4  
5  
6  
7  
8  
9  
10  
11  
12  
13  
14  
15  
16  
17  
18  
19  
20  
21  
22  
23  
24  
25  
26  
27  
28  
29  
30  
31  
32  
33  
34  
35  
36  
37  
38  
39  
40  
41  
42  
43  
44  
45  
46  
47  
48  
49  
50  
51  
52  
53  
54  
55  
56  
57  
58  
59  
60

|  |                                                                                                                                                               |
|--|---------------------------------------------------------------------------------------------------------------------------------------------------------------|
|  | MANAGEMENT, ETHICS (see Medical Ethics), Human resource management < HEALTH SERVICES ADMINISTRATION & MANAGEMENT, MEDICAL ETHICS, PRIMARY CARE, PUBLIC HEALTH |
|  |                                                                                                                                                               |

SCHOLARONE™  
Manuscripts

For peer review only



1  
2  
3 **1 Dentists' intention to report suspected violence: a cross-sectional study in eight Arab**  
4  
5 **2 countries**

6  
7 3 Maha El Tantawi, Department of Preventive Dental Sciences, College of Dentistry, Imam Abdulrahman Bin  
8  
9 4 Faisal University, Dammam, Saudi Arabia; Balgis Gaffar, Department of Preventive Dental Sciences, College of  
10  
11 5 Dentistry, Imam Abdulrahman Bin Faisal University, Dammam, Saudi Arabia; Arheiam Arheiam, Department  
12  
13 6 of Community and Preventive Dentistry, Faculty of Dentistry, University of Benghazi, Benghazi, Libya; Wafaa  
14  
15 7 AbdelAziz, Department of Pediatric Dentistry and Dental Public Health, Faculty of Dentistry, Alexandria  
16  
17 8 University, Alexandria, Egypt; Ola B. Al-Batayneh, Department of Preventive Dentistry, Jordan University of  
18  
19 9 Science and Technology, Irbid, Jordan; Mansur F. Alhoti, Benghazi Psychiatric Hospital, Benghazi, Libya;  
20  
21 10 Sadeq Al-Maweri, Alfarabi colleges, Riyadh, Saudi Arabia; Mai A. Dama, Department of Paedodontics and  
22  
23 11 Orthodontics, College of Dentistry, The Arab American University, Jenin, Palestine; Mounir Zaghez,  
24  
25 12 Department of Oral Medicine, Faculty of Medicine, Annaba University (BADJI Mokhtar), Annaba, Algeria;  
26  
27 13 Khalid Saddiq Hassan, Department of Oral Medicine and Periodontology, Faculty of Dentistry, AlAzhar  
28  
29 14 University, Assiut Branch, Assiut, Egypt; Mona Al-Sane, Department of Developmental and Preventive  
30  
31 15 Sciences, Faculty of Dentistry, Kuwait University, Kuwait; Maha AbdelSalam, Department of Biomedical  
32  
33 16 Dental Sciences, College of Dentistry, Imam Abdulrahman Bin Faisal University, Dammam, Saudi Arabia; Wael  
34  
35 17 Sabbah, Department of Population and Patient Health, King's College Hospital, London, United Kingdom; Arwa  
36  
37 18 I. Owais, Department of Pediatric Dentistry, College of Dentistry, University of Iowa, Iowa, United States;  
38  
39 19 Fatma Abdelgawad, Department of Pediatric Dentistry and Dental Public Health, Faculty of Oral and Dental  
40  
41 20 Medicine, Cairo University, Cairo, Egypt; Thiyezen Abdullah Aldhelai, Department of orthodontic and Pediatric  
42  
43 21 Dentistry, College of Dentistry, University of Ibb, Sanaa, Yemen; Omar Abd El Sadek El Meligy, Department of  
44  
45 22 Pediatric Dentistry, Faculty of Dentistry, King Abdulaziz University, Jeddah, Saudi Arabia and Department of  
46  
47 23 Pediatric Dentistry and Dental Public Health, Faculty of Dentistry, Alexandria University, Alexandria, Egypt;  
48  
49 24 Jehan AlHumaid, Department of Preventive Dental Sciences, College of Dentistry, Imam Abdulrahman Bin  
50  
51 25 Faisal University, Dammam, Saudi Arabia; Fahad Al-Harbi, Department of Substitutive Dental Sciences,  
52  
53 26 College of Dentistry, Imam Abdulrahman Bin Faisal University, Dammam, Saudi Arabia.

54  
55  
56  
57  
58  
59  
60  
**28 Corresponding author**

29 Prof. Maha El Tantawi, College of Dentistry, Imam Abdulrahman Bin Faisal University, P.O. Box 1982,  
30 Dammam Coastal Road, 31441 Dammam, Saudi Arabia. Phone: +966 13 8574928, ext: 216, Fax: + 966 13

1  
2  
3  
4  
5  
6  
7  
8  
9  
10  
11  
12  
13  
14  
15  
16  
17  
18  
19  
20  
21  
22  
23  
24  
25  
26  
27  
28  
29  
30  
31  
32  
33  
34  
35  
36  
37  
38  
39  
40  
41  
42  
43  
44  
45  
46  
47  
48  
49  
50  
51  
52  
53  
54  
55  
56  
57  
58  
59  
60

31 8572624. Email: [maha\\_tantawy@hotmail.com](mailto:maha_tantawy@hotmail.com), [mmtantawy@iau.edu.sa](mailto:mmtantawy@iau.edu.sa), [ORCID: orcid.org/0000-0003-4989-6584](https://orcid.org/0000-0003-4989-6584)

32 6584

33

For peer review only

## 34 **Abstract**

### 35 **Objectives**

36 This study assessed dentists' intention in eight Arab countries to report suspected exposure to  
37 violence among patients and factors associated with this intention based on the theory of  
38 planned behavior.

### 39 **Methods**

40 A cross-sectional study was conducted in 2016 including a convenience sample of dentists  
41 practicing in public, private and academic sectors in Algeria, Egypt, Jordan, Kuwait, Libya,  
42 Palestine, Saudi Arabia and Yemen. Respondents answered a self-administered questionnaire  
43 collecting information about personal and professional background and perceived ability to  
44 identify victims of violence. The questionnaire assessed (on a scale from 1 to 10 using 6  
45 negative statements) dentists' perception of healthcare system mandated reporting of  
46 suspected violence. Six statements were used to assess professional attitude toward reporting  
47 suspected violence. Logistic regression was used to assess the association between intention  
48 to report suspected violence and perceived ability, perception and attitude adjusting for  
49 confounders.

### 50 **Results**

51 The response rate was 65.2% (n= 2,936/ 4506) from general practitioners (70.9%) of mean  
52 age= 31 years with 56.7% females. Of those, 68.8% intended to report and 52.2% considered  
53 themselves able to identify violence victims. The mean (SD) negative perception score=  
54 5.3/10 (2.1) and the mean (SD) professional attitude score= 7.5/10 (1.9). In multivariate  
55 regression, intention to report was associated with professional attitude (OR= 1.08, 95%CI=  
56 1.03, 1.14), ability to identify violence victims (OR= 1.76, 95%CI=1.45, 2.12) and negative  
57 perception that reporting is not mandated (OR= 0.89, 95%CI=0.85, 0.94). Significant  
58 differences existed among countries in intention to report.

1  
2  
3 59 **Conclusion**

4  
5 60 Most dentists intended to report suspected violence and their intention could be explained by  
6  
7 61 the theory of planned behavior which offers a framework for professional development to  
8  
9 62 support violence victims. Sharing of training resources, policies and guidelines is needed to  
10  
11 63 ensure that practices similar to international guidelines are consistently adopted by dentists  
12  
13 64 across Arab countries.  
14  
15  
16  
17  
18  
19  
20  
21  
22  
23  
24  
25  
26  
27  
28  
29  
30  
31  
32  
33  
34  
35  
36  
37  
38  
39  
40  
41  
42  
43  
44  
45  
46  
47  
48  
49  
50  
51  
52  
53  
54  
55  
56  
57  
58

For peer review only

## 65 **Strengths and limitations**

- 66 • We included dentists from eight Arab countries which increases the geographic  
67 representativeness of our findings and fills a knowledge gap about the intended  
68 practices of dentists in this region.
- 69 • The theory of planned behavior provides a framework to explain the intention to  
70 report and helps in planning professional development activities to better prepare  
71 dentists to help their patients.
- 72 • Social desirability might have affected our estimates of dentists' intention to report  
73 suspected violence.
- 74 • Dentists in private practice were under represented compared to dentists from the  
75 public and academic sectors.

## 77 **Funding statement**

78 This research received no specific grant from any funding agency in the public,  
79 commercial or not-for-profit sectors.

## 81 **Competing interest statement**

82 None declared.

## 84 **Data sharing statement**

85 The dataset will be made available from the corresponding author.

## 86 **Introduction**

87 In 2014, the World Health Organization (WHO) issued the first report on the global  
88 status of violence prevention [1]. The report defined interpersonal violence as violence that  
89 occurs between family members, intimate partners, friends, acquaintances and strangers and  
90 includes child maltreatment, intimate partner violence and elder abuse in addition to some  
91 other forms of violence. The report showed that although the problem is preventable and  
92 efforts were already under way to reduce it, much remained to be done. Global statistics [1]  
93 indicate that most cases of violence against children, women and elderly are not reported to  
94 authorities or service providers. This emphasizes the need of the health sector to have a more  
95 active role in documenting and reporting cases of violence.

96 The Eastern Mediterranean Region which includes Arab countries has one of the  
97 highest prevalence of intimate partner violence, the most extensively surveyed of all types of  
98 violence, among the six WHO regions (37%). Comprehensive information about violence  
99 against children and the elderly is not available [1]. Arab countries are more defined by their  
100 shared culture than by being a specific race [2]. Given that what constitutes violence depends  
101 on contextual and cultural norms, what would be labelled as violence against women or  
102 children in western countries, may be culturally acceptable or may be considered a private  
103 matter in Arab countries [3]. Because of this, studies related to violence management that  
104 were conducted in western countries may not apply in Arab countries.

105 Dental care settings are often the primary contact point for violence victims since head  
106 and face injuries are sites with common manifestation of physical violence [4]. Like all health  
107 care professionals, dentists' main goal is to protect human life and the wellbeing of their  
108 patients [5] and therefore, they can play an important role in identifying and reporting victims  
109 of violence. However, we know little about Arab dentists' willingness to report cases of  
110 violence. A review of literature showed that there were few studies that were conducted

1  
2  
3 111 among dentists in Arab countries and that they focused on children abuse; in Jordan [6,7],  
4  
5 112 Saudi Arabia [8, 9] and the United Arab Emirates [10]. However, none of these studies  
6  
7 113 investigated dentists' intention to report suspicion of violence among adults.  
8

9 114 Scientific evidences [11, 12] show the importance of studying this topic for the dental  
10  
11 115 community, but there is still the need to assess the willingness of dentists in Arab countries to  
12  
13 116 report suspected violence, considering there are only a few studies performed in this region.  
14  
15 117 Such information helps inform public health policy, laws and future intervention programs  
16  
17 118 targeting prevention and management of violence. The hypothesis of the study was that  
18  
19 119 dentists' intention to report violence can be explained by the theory of planned behavior [13]  
20  
21 120 where dentists would be more willing to report if they perceive that the health care system  
22  
23 121 requires them to report (normative beliefs), if they have favorable professional attitude toward  
24  
25 122 reporting (behavioral beliefs) and if they think they are able to identify victims of violence  
26  
27 123 (control beliefs). The aims of this study were to 1) assess the intention of dentists in eight  
28  
29 124 Arab countries to report cases of suspected violence and to 2) identify factors associated with  
30  
31 125 this intention.  
32  
33  
34  
35  
36

## 37 127 **Methods**

38  
39 128 Data for this cross-sectional study was collected from April to December 2016 after  
40  
41 129 obtaining the approval of the research ethics committee; the Research Unit in the College of  
42  
43 130 Dentistry, University of Dammam, Saudi Arabia (EA216008) and in accordance with the  
44  
45 131 guidelines of the Helsinki Declaration. Dentists were targeted in eight Arab countries;  
46  
47 132 Algeria, Egypt, Jordan, Kuwait, Libya, Palestine, Saudi Arabia and Yemen. To assess the  
48  
49 133 prevalence of intention to report, sample size was calculated  
50  
51 134 (<http://www.nss.gov.au/nss/home.nsf/pages/Sample+size+calculator>) using the following  
52  
53 135 assumptions: confidence level= 95%, confidence interval= 5%, total number of dentists in  
54  
55  
56  
57  
58  
59  
60

1  
2  
3 136 each country [14] with an estimated percentage of reporting suspected violence= 32% [10].  
4  
5 137 The number was increased by 25% to allow for non-response. The minimum required sample  
6  
7 138 size per country ranged from 300 to 470 dentists.

8  
9 139 Participants were selected using convenience sampling including dentists affiliated  
10  
11 140 with professional groups, or from regions where they would be clustered such as capitals and  
12  
13 141 big cities and from different areas in each country to ensure geographic coverage. Because of  
14  
15 142 the war situation in Libya, data collection was restricted only to Eastern Libya. In Algeria,  
16  
17 143 only the city of Annaba was included and the respondents were alumni of Annaba University.

18  
19  
20 144 Dentists were invited to participate if they 1) had a bachelor of dentistry or equivalent  
21  
22 145 degree and 2) were practicing in one of the eight Arab countries. In the beginning, dentists  
23  
24 146 were included only if they were nationals of the country. Later on, this criterion was dropped  
25  
26 147 due to the presence of a considerable percentage of expats in some countries so that the  
27  
28 148 sample would reflect the profession profile in the participating countries.

29  
30  
31 149 Data was collected using a questionnaire that was developed based on previous studies  
32  
33 150 [9, 10, 15] (supplementary file). It consisted of five sections including 20 close-ended  
34  
35 151 questions. The first section sought information about personal background (age in years,  
36  
37 152 gender (male or female) and having children (yes or no)). The 2<sup>nd</sup> section inquired about  
38  
39 153 professional background including specialization (general practitioner or specialist/  
40  
41 154 consultant), type of practice (private, public or academic sectors), receiving training (yes or  
42  
43 155 no) and perceived ability to identify victims of violence (yes or no). The 3<sup>rd</sup> section assessed  
44  
45 156 perception of mandated reporting of suspected violence. Participants were asked to indicate  
46  
47 157 how much they considered each of six statements was true of the place they worked on a scale  
48  
49 158 from not true at all (1) to very true (10). The statements were all negatively phrased and  
50  
51 159 indicated that reporting was not required by law, not enforced, not a rule of the place one  
52  
53 160 worked, not the dentist's job to do, not culturally acceptable and that there was no specific  
54  
55  
56  
57  
58  
59  
60



1  
2  
3 161 authority to report to. The 4<sup>th</sup> section assessed respondents' attitude toward reporting violence  
4  
5 162 using 6 statements to which they were asked to indicate agreement on a scale from completely  
6  
7 163 disagree (1) to completely agree (10). The statements indicated that reporting was the right  
8  
9 164 thing to do, was the dentist's responsibility, that the dentist would always document the  
10  
11 165 manifestations of suspected violence (positive) in addition to statements indicating that the  
12  
13 166 dentist was too busy with patients to report, that the issue of violence was a family's business  
14  
15 167 where nobody should interfere and that it was embarrassing to check about violence  
16  
17 168 (negative). In the 5<sup>th</sup> section, respondents were asked whether they would report suspected  
18  
19 169 violence to the police, social services agencies/ Ministry of Social Affairs, Ministry of Health,  
20  
21 170 non- governmental organizations (NGOs) or others. The questionnaire was pilot tested and  
22  
23 171 culturally adapted in each country.  
24  
25

26 172 The questionnaire was preceded by a brief explanation of the study purpose and  
27  
28 173 explained that by responding, the dentist indicated consent to join the study. It took about ten  
29  
30 174 minutes to complete and was self-administered, in Arabic and English, as printed and  
31  
32 175 electronic versions. A respondent received the questionnaire by hand or a link to the  
33  
34 176 electronic version was sent to an email list or by WhatsApp message. The investigator issued  
35  
36 177 three reminders over a period of three months in case of non-response.  
37  
38

### 39 178 Analysis

40  
41 179 The internal consistency of the statements of perception and attitude was assessed  
42  
43 180 using Cronbach alpha. Overall scores of the two constructs were developed by averaging the  
44  
45 181 items' scores after reverse coding negative attitude statements. Higher perception score thus  
46  
47 182 indicated less (negative) perception so that dentists considered themselves not mandated to  
48  
49 183 report and higher attitude score indicated more positive professional attitude. Separate logistic  
50  
51 184 regression models were developed to assess the association between intention to report  
52  
53 185 suspected violence (dichotomous outcome: yes vs no) and each of (a) perception of mandated  
54  
55  
56  
57  
58  
59  
60

186 reporting (norms) (measured on a scale from 1 to 10), (b) professional attitude toward  
 187 reporting (measured on a scale from 1 to 10) and (c) perceived ability to identify victims of  
 188 violence (control) (yes vs no) in addition to personal and professional factors (all were  
 189 categorical variables except age). Countries were considered to have protective services for  
 190 children or adults based on the WHO report whether these services were limited, partial or  
 191 full [1]. All factors were included in a multivariable model where they were simultaneously  
 192 adjusted after removing the factors whose estimates showed correlation. All models were  
 193 adjusted for country of practice. Odds ratios, 95% confidence intervals and p values were  
 194 calculated for all models and so was the percentage of correctly classified cases for the model  
 195 including all variables.

## 197 Results

198 The overall response rate was 65.2% ranging from 51% in Palestine to 78% in Yemen  
 199 (Table 1). Some nationalities practiced in their own countries and in other countries included  
 200 in the study (Egyptians 28.1% vs 29.9%, Jordanians 11.8% vs 12.6% and Yemenis 9.9% vs  
 201 10.4%). The majority of expats were from Asian (5.4%) or other Arab countries not included  
 202 in the study (3.1%). Protective services for victims of violence were not documented in  
 203 Kuwait, Libya and Palestine.

204  
 205 Table 1: Response rate, presence of protective services and intention to report by country

| Country | Response rate   | Documented presence of protective services | Intention to report<br>N (%) |
|---------|-----------------|--------------------------------------------|------------------------------|
| Algeria | 110/ 175= 62.9% | Yes                                        | 88 (80%)                     |
| Egypt   | 826/ 1271= 65%  | Yes                                        | 505 (61.1%)                  |
| Jordan  | 347/ 475= 73.1% | Yes                                        | 271 (78.1%)                  |

|              |                   |     |              |
|--------------|-------------------|-----|--------------|
| Kuwait       | 449/ 632= 71%     | No  | 305 (67.9%)  |
| Libya        | 225/389= 57.8%    | No  | 159 (70.7%)  |
| Palestine    | 380/ 745= 51%     | No  | 326 (85.8%)  |
| Saudi Arabia | 308/ 446= 69.1%   | Yes | 190 (61.7%)  |
| Yemen        | 291/ 373= 78%     | Yes | 175 (60.1%)  |
| Total        | 2936/ 4506= 65.2% |     | 2019 (68.8%) |

206

207 The mean (SD) age in years was 31.0 (9.2), 56.7% were females and 53.7% had no  
 208 children (Table 2). Most respondents were general practitioners (70.9%) working in the public  
 209 (43.9%) or private sectors (34.2%). Only 19.3% reported receiving training to manage victims  
 210 of violence and 52.2% claimed that they can identify them. Protective services for victims of  
 211 violence were present in the countries of practice of 64.1% of the respondents.

212

213 Table 2: Personal and professional background of participants

| Factor            |                        | N (%)        |
|-------------------|------------------------|--------------|
| Age               | Mean (SD)              | 31.0 (9.2)   |
| Gender            | Male                   | 1268 (43.3%) |
|                   | Female                 | 1659 (56.7%) |
| Has no children   |                        | 1571 (53.7%) |
| Specialization    | General practitioner   | 2047 (70.9%) |
|                   | Specialist/ Consultant | 839 (29.1%)  |
| Type of practice  | Private sector         | 976 (34.2%)  |
|                   | Public sector          | 1257 (43.9%) |
|                   | Academic sector        | 623 (21.9%)  |
| Received training |                        | 565 (19.3%)  |

|                                                                               |              |
|-------------------------------------------------------------------------------|--------------|
| Perceived ability to identify victims of violence                             | 1445 (52.2%) |
| Presence of protective services for children or adults in country of practice | 1882 (64.1%) |

214

215 The majority of respondents indicated their intention to report suspected violence  
 216 (2019, 68.8%); mainly to the police (933, 31.8%), or social affairs agencies (842, 28.7%)  
 217 followed by the Ministry of Health (303, 10.3%) and NGOs (132, 4.5%). There was a  
 218 significant difference among countries in the percentage of dentists indicating intention to  
 219 report ranging from 60.1% in Yemen to 85.8% in Palestine ( $P < 0.0001$ , Table 1).

220 Figure 1 shows that the highest mean negative perception item score was for  
 221 perceiving that reporting was not enforced (6.5) followed by perceiving that there was no  
 222 authority to report to (6.2). The internal consistency of perception statements was acceptable  
 223 (Cronbach alpha = 0.68, 95% CI= 0.66, 0.70,  $P < 0.0001$ ) and the mean (SD) equals 5.3 (2.1).  
 224 The highest mean score for statements of attitude toward reporting (Figure 2) was for  
 225 indicating that it was the right thing to do (8.7) and the lowest was for the negative statement  
 226 indicating that the respondent was too busy treating patients to report (mean= 3.2). The  
 227 internal consistency of the statements was good (Cronbach alpha = 0.72, 95% CI= 0.70, 0.74,  
 228  $P < 0.0001$ ) and the mean (SD) equals 7.5 (1.9).

229 Dentists who practiced in countries where there were protective services for violence  
 230 victims had significantly higher negative perception and lower attitude scores than those  
 231 without such services ( $P < 0.0001$  and 0.02). Dentists who reported being able to identify  
 232 violence victims had significantly lower negative perception and higher attitude scores than  
 233 those who did not ( $P < 0.0001$ , Table 3). There was a significant moderate negative correlation  
 234 between perception and professional attitude (Pearson  $r = -0.32$ ,  $P < 0.0001$ ).

235

236

237 Table 3: Association of perception and attitude with presence of protective services and  
 238 ability to identify victims of violence

|                                | Score: mean (SD)                           |                                               | P value  |
|--------------------------------|--------------------------------------------|-----------------------------------------------|----------|
|                                | Protective services in country of practice | No protective services in country of practice |          |
| Negative perception            | 5.50 (2.13)                                | 4.87 (2.11)                                   | <0.0001* |
| Positive professional attitude | 7.41 (1.94)                                | 7.59 (1.87)                                   | 0.02*    |
|                                | Able to identify victims of violence       | Not able to identify victims of violence      |          |
| Negative perception            | 4.98 (2.17)                                | 5.56 (2.06)                                   | <0.0001* |
| Positive professional attitude | 7.72 (1.85)                                | 7.25 (1.99)                                   | <0.0001* |

239 \*: statistically significant at  $P < 0.05$

240

241 Table 4 shows that attitude, perception and reported ability to identify violence  
 242 victims were significantly associated ( $P < 0.0001$ ) with intention to report in the separate  
 243 models (model 1) in addition to gender ( $P < 0.0001$ ), age ( $P = 0.004$ ) and presence of  
 244 protective services ( $P < 0.0001$ ). In the multivariable model 2, higher odds of intention to  
 245 report were significantly associated with higher professional attitude score (OR= 1.08, 95%  
 246 CI= 1.03, 1.14) and reported ability to identify victims of violence (OR= 1.76, 95% CI= 1.45,  
 247 2.12). Lower odds of intended reporting were significantly associated with higher score of  
 248 negative perception (OR= 0.89, 95% CI= 0.85, 0.94). In addition, the presence of protective  
 249 services was associated with significantly lower odds of intention to report (OR= 0.34, 95%  
 250 CI= 0.22, 0.50). The multivariable model 2 correctly classified 71.6% of dentists based on  
 251 intention to report suspected violence.

252

253

254

Table 4: Factors associated with intention to report suspected violence

| Factors                                                       | Model 1            |          | Model 2           |          |
|---------------------------------------------------------------|--------------------|----------|-------------------|----------|
|                                                               | OR (95% CI)        | P value  | OR (95% CI)       | P value  |
| Higher attitude score by one point                            | 1.10 (1.06, 1.15)  | <0.0001* | 1.08 (1.03, 1.14) | 0.002*   |
| Higher negative perception score by one point                 | 0.88 (0.84, 0.92)  | <0.0001* | 0.89 (0.85, 0.94) | <0.0001* |
| Ability to identify victims of violence vs not                | 1.80 (1.52, 2.14)  | <0.0001* | 1.76 (1.45, 2.12) | <0.0001* |
| Male vs female                                                | 1.74 (1.47, 2.06)* | <0.0001* | 1.85 (1.52, 2.25) | <0.0001* |
| Older dentist by one year                                     | 1.01 (1.004, 1.02) | 0.004*   | 1.01 (0.99, 1.02) | 0.36     |
| Has children vs does not have children                        | 1.14 (0.97, 1.35)  | 0.12     | -                 | -        |
| General practitioner vs specialist/ consultant                | 0.99 (0.83, 1.19)  | 0.93     | -                 | -        |
| Working in public vs private sector                           | 0.95 (0.77, 1.18)  | 0.66     | 1.11 (0.87, 1.42) | 0.40     |
| Working in academic vs private sector                         | 0.83 (0.66, 1.05)  | 0.11     | 0.88 (0.68, 1.15) | 0.37     |
| Presence of protective services in country of practice vs not | 0.25 (0.17, 0.36)  | <0.0001* | 0.34 (0.22, 0.50) | <0.0001* |

255 Model 1: includes individual factors adjusted for country of practice

256 Model 2: includes all factors adjusted for country of practice

1  
2  
3 257 OR: odds ratio, CI: confidence interval, \*: statistically significant at  $P < 0.05$ . Percent  
4  
5 258 correctly classified by multivariable model: 71.6%.

6  
7 259

## 8 9 260 **Discussion**

10  
11 261 Our results indicated a moderate level of dentists' intention to report suspected  
12  
13 262 violence with significant difference among the eight Arab countries. The findings supported  
14  
15 263 the hypothesis and showed that the theory of planned behavior [13] correctly classified most  
16  
17 264 dentists regarding their intention to report suspected violence. A combination of dentist's  
18  
19 265 professional attitude, perceived ability to identify victims of violence and perception of  
20  
21 266 mandatory rules and regulation were associated with intention to report. The presence of  
22  
23 267 protective services in the country of practice was associated with less intention to report.

24  
25 268 Most dentists in the present study (68.8%) indicated they intended to report violence.  
26  
27 269 This finding is similar to those of previous studies in Arab countries such as Jordan [6] and  
28  
29 270 Saudi Arabia [8,9] and western countries such as Scotland [16] and Brazil [17]. However, less  
30  
31 271 intention to report was shown in some studies from Italy [18], Brazil [19] and France [5].

32  
33 272 Even with the most favorable intentions, dentists will not report violence if they  
34  
35 273 cannot identify its signs. In the present study, 52.2% of the respondents reported being able to  
36  
37 274 identify victims of violence. Previous studies showed differences in dentists' perceived ability  
38  
39 275 to identify victims of violence across countries [5,6, 8, 18-20] which might be attributed to  
40  
41 276 variations in training requirements and opportunities across countries.

42  
43 277 Our definition of subjective norms was based on dentists' perception of mandated  
44  
45 278 reporting in the workplace. We used this definition instead of focusing on significant others  
46  
47 279 since the mobility of dentists across countries meant that the values shared by these others  
48  
49 280 may differ from those prevailing in country of practice. The approach we followed was  
50  
51 281 similar to the definition of Ben Natan et al [21] where they focused on those who educated

1  
2  
3 282 nursing students. In the present study, the mean score of negative perception was 5.3/ 10  
4  
5 283 indicating that, on average, no clear message was received by dentists from their work place  
6  
7 284 whether or not to report suspected violence. This was more because dentists felt the law was  
8  
9 285 not enforced than their perception that reporting was not mandated (mean = 6.5 and 3.8). This  
10  
11 286 agrees with Adair et al [22] who concluded that the likelihood of intending to report suspected  
12  
13 287 violence was greater if dentists recognized that they were legally mandated to report. Our  
14  
15 288 finding agrees with previous studies concluding that the presence of laws per se does not  
16  
17 289 necessarily improve the awareness of mandated reporting. For example, Katner and Brown  
18  
19 290 [23] reported that all 50 American states require dentists to report suspected violence among  
20  
21 291 their patients. Nevertheless, surveys assessing US dentists' knowledge of mandated reporting  
22  
23 292 showed that respondents were not aware of this legal obligation [24]. The same situation was  
24  
25 293 also reported among Brazilian dentists [19, 20]. Negative perception in the current study was  
26  
27 294 also related to perceiving that there was no authority to report to and the absence of clear  
28  
29 295 rules. Similar perceptions were reported in previous studies addressing child abuse in Arab  
30  
31 296 countries such as Saudi Arabia [8,9] and in other countries including India [15], United States  
32  
33 297 [25], Brazil [17] and Northern Ireland [26]. This inadequate knowledge of how or who to  
34  
35 298 report to might be due to the presence of several potential recipients of violence reports [10]  
36  
37 299 or recent enactment of laws [9].  
38  
39  
40

41 300 In the present study, the presence of protective services was associated with lower  
42  
43 301 odds of intention to report (OR= 0.34), greater negative perception and less positive  
44  
45 302 professional attitude. This might be attributed to dentists not perceiving these services as  
46  
47 303 indicative of real change in social and cultural norms or health care system perspective  
48  
49 304 regarding reporting. Alternatively, they might have considered that care of violence victims  
50  
51 305 was shifted to these services so that they would be ethically justified not to report violence.  
52  
53 306 However, studies using qualitative research techniques are needed for further investigation.  
54  
55  
56  
57  
58  
59  
60



1  
2  
3 307 In our study, respondents had positive professional attitude toward reporting violence  
4  
5 308 (mean= 7.5/ 10) which agrees with previous studies from Saudi Arabia concerning reporting  
6  
7 309 suspected child abuse [9] and domestic violence [27]. It also agrees with the positive attitude  
8  
9 310 expressed by dentists toward their role in managing child abuse in India [28], Scotland [16],  
10  
11 311 Jordan [6], Brazil [20] and Greece [29] as well as domestic violence reporting in Brazil [17],  
12  
13 312 India [30] and France [5]. Such positive professional attitude - similar to dentists' attitude in  
14  
15 313 other countries- might differ from some negative attitudes and practices in Arab societies that  
16  
17 314 are seen in violence statistics [1]. The predominance of professional attitude over societal  
18  
19 315 practices agrees with a study showing that cultural differences between Arab and Jewish  
20  
21 316 nursing students in Israel did not affect the intention to screen for domestic violence due to  
22  
23 317 the similarity of their education [21]. It also agrees with a study from Taiwan, a country with  
24  
25 318 eastern cultural values, which showed that nurses did not accept the cultural belief that  
26  
27 319 parents can physically discipline their children because these nurses were exposed to mixed  
28  
29 320 cultural influences from the east and west [31]. The young age of nurses in that study was  
30  
31 321 similar to that of our participants and might explain the similarity between the two studies.  
32  
33 322 However, the professional attitude in our study disagrees with Usta et al [32] who reported  
34  
35 323 that Lebanese physicians considered domestic violence a social problem not a medical one  
36  
37 324 and were ready to intervene only when there was actual physical injury. The difference  
38  
39 325 between that study and ours might be because most of the physicians were in private practice  
40  
41 326 and more likely to be worried about the implications on practice income if their local  
42  
43 327 community resented their intervention. Most of the participants in our study, on the other  
44  
45 328 hand, were in the public or academic sectors. Some negative attitudes reported in our study -  
46  
47 329 such as dentists' embarrassment to intervene or considering violence as a family matter- were  
48  
49 330 also reported by 51% of American dentists in one study [33], and cited by 75% of another  
50  
51  
52  
53  
54  
55  
56  
57  
58  
59  
60

1  
2  
3 331 group of American dentists as a barrier to reporting [34]. This shows the global prevalence of  
4  
5 332 the problem that may transcend geographical barriers and cultural backgrounds.

6  
7 333 Female dentists in our study were less likely to intend reporting suspected violence.

8  
9 334 The impact of dentist gender in the issue of suspected violence varied among studies. At the

10  
11 335 level of knowledge of rules and regulation, female dentists in Saudi Arabia were better than

12  
13 336 males [9]. However, actual reporting of suspected violence was more likely among male

14  
15 337 dentists in Jordan [7]. Similarly, among Brazilian nurses, of whom 86% were female, under-

16  
17 338 reporting of violence was noticed and was attributed to conforming to cultural norms [35].

18  
19 339 Future studies using qualitative research techniques may help elucidate this gender difference

20  
21 340 and whether it is due to cultural expectations of how females- including dentists- should act or

22  
23 341 because they are less involved with victims of violence.

24  
25 342 In our study, the theory of planned behavior correctly classified most dentists based on

26  
27 343 intention to report violence. Previously, the theory predicted the intention of 28% of Israeli

28  
29 344 nurses to report child abuse [36, 37] and 32% of their intention to screen for domestic

30  
31 345 violence where attitudes and subjective norms were significant predictors (regression

32  
33 346 coefficients= 0.15 and 0.05) [21]. Similarly, Feng and Wu [38] explained Taiwanese nurses'

34  
35 347 intention to report child abuse using the same theory. Greater association with the outcome

36  
37 348 was attributed to professional attitude than subjective norms. The least impact was for

38  
39 349 perceived control which was attributed to the inadequate instructions of how to report.

40  
41 350 There are some limitations to this study that should be considered. We assessed the

42  
43 351 intention to report which might differ from actual reporting [5] and future studies are needed

44  
45 352 to assess these differences. Self-reporting and social desirability could have affected our

46  
47 353 estimates of intention to report. We also assessed the intention to report regardless of the type

48  
49 354 of violence (physical, verbal or otherwise) or victim background (age or gender) and there is a

50  
51 355 need to investigate how these factors might affect the intention to report. In addition, our

1  
2  
3 356 estimate of intention to report might have been affected by the under representation of dentists  
4  
5 357 in private practice compared to those in the public and academic sectors. Our results need to  
6  
7 358 be interpreted with caution due to the convenience sample we used. One of the strengths of  
8  
9 359 our study is the large sample size of 3,000 dentists which helps in extrapolating the findings  
10  
11 360 to 59.5 thousand dentists [14] caring for 213 million individuals in eight Arab countries [39].  
12  
13 361 Additionally, the diversity of nationalities and locations helps in reporting on a group of  
14  
15 362 professionals with shared background and allows for wider generalizability.  
16  
17  
18 363

## 364 **Conclusions**

365 In the present study, dentists' intention to report violence was associated with  
366 professional attitudes, perceptions and perceived abilities which were similar to those of  
367 dentists in other countries but never the less, showed differences by country of practice. Our  
368 findings have implications for training to improve the reporting of suspected violence by  
369 developing dentists' abilities to identify diagnostic signs, fostering favorable attitude and  
370 increasing awareness of already existing rules and regulations. There is a need to develop  
371 shared training resources, policies and clear guidelines that allow consistent professional  
372 practices and at the same time acknowledge cultural diversity across countries.

373 **References**

- 374 1. World Health Organization. Global status report on violence prevention 2014.  
375 Available from:  
376 [http://www.who.int/violence\\_injury\\_prevention/violence/status\\_report/2014/en/](http://www.who.int/violence_injury_prevention/violence/status_report/2014/en/).  
377 Accessed June 10, 2017.
- 378 2. Obeidat BY, Shannak RO, Masa'deh RT, Al-Jarrah IM. Toward better understanding  
379 for Arabian culture: Implications based on Hofstede's cultural model. *Eur J Soc Sci*.  
380 2012;28(4):512-522.
- 381 3. Douki S, Nacef F, Belhadj A, Bouasker A, Ghachem R. Violence against women in  
382 Arab and Islamic countries. *Arch Womens Ment Health*. 2003;6(3):165-171.
- 383 4. Coulthard P, Warburton AL. The role of the dental team in responding to domestic  
384 violence. *Br Dent J*. 2007;203(11):645-648.
- 385 5. Drigeard C, Nicolas E, Hansjacob A, Roger-Leroi V. Educational needs in the field of  
386 detection of domestic violence and neglect: the opinion of a population of French  
387 dentists. *Eur J Dent Educ*. 2012;16(3):156-165.
- 388 6. Owais AIN, Qudeimat MA, Qodceih S. Dentists' involvement in identification and  
389 reporting of child physical abuse: Jordan as a case study. *Int J Paediatr Dent*.  
390 2009;19(4):291-296.
- 391 7. Sonbol HN, Abu-Ghazaleh S, Rajab LD, Baqain ZH, Saman R, Al-Bitar ZB.  
392 Knowledge, educational experiences and attitudes towards child abuse amongst  
393 Jordanian dentists. *Eur J Dent Educ*. 2012;16(1):e158-e165.
- 394 8. Al-Dabaan R, Newton JT, Asimakopoulou K. Knowledge, attitudes, and experience of  
395 dentists living in Saudi Arabia toward child abuse and neglect. *Saudi Dent J*.  
396 2014;26(3):79-87.

- 1  
2  
3 397 9. Mogaddam M, Kamal I, Merdad L, Alamoudi N. Knowledge, attitudes, and behaviors  
4  
5 398 of dentists regarding child physical abuse in Jeddah, Saudi Arabia. *Child Abuse Negl.*  
6  
7 399 2016;54:43-56.
- 8  
9 400 10. Al-Amad SH, Awad MA, Al-Farsi LH, Elkhaled RH. Reporting child abuse cases by  
10  
11 401 dentists working in the United Arab Emirates (UAE). *J Forensic Leg Med.*  
12  
13 402 2016;40:12-15.
- 14  
15 403 11. Rodrigues JLSA, Lima APB, Nagata JY, Rigo L, Cericato GO, Franco A, et al.  
16  
17 404 Domestic violence against children detected and managed in the routine of dentistry -  
18  
19 405 A systematic review. *J Forensic Leg Med.* 2016;43:34-41.
- 20  
21 406 12. Silva LO, Souza-Silva BN, de Alcântara Rodrigues JL, Rigo L, Cericato GO, Franco  
22  
23 407 A, et al. Identification and management of elder physical abuse in the routine of  
24  
25 408 dentistry - a systematic review. *Gerodontology.* 2017;34(1):3-12.
- 26  
27 409 13. Ajzen I. From intentions to actions: A theory of planned behavior. In: *Action control.*  
28  
29 410 Berlin, Heidelberg: Springer Berlin Heidelberg; 1985:11-39.
- 30  
31 411 14. World Health Organization: Global Health Observatory data repository. Dentistry  
32  
33 412 personnel - Data by country. World Health Organization. 2017. Available from:  
34  
35 413 <http://apps.who.int/gho/data/node.main.HWF2?lang=en>. Accessed June 10, 2017.
- 36  
37 414 15. Deshpande A, Macwan C, Poonacha K, Bargale S, Dhillon S, Porwal P. Knowledge  
38  
39 415 and attitude in regards to physical child abuse amongst medical and dental residents of  
40  
41 416 central Gujarat: A cross-sectional survey. *J Indian Soc Pedod Prev Dent.*  
42  
43 417 2015;33(3):177-182.
- 44  
45 418 16. Harris CM, Welbury R, Cairns AM. The Scottish dental practitioner's role in  
46  
47 419 managing child abuse and neglect. *Br Dent J.* 2013;214(9):E24.
- 48  
49  
50  
51  
52  
53  
54  
55  
56  
57  
58  
59  
60

- 1  
2  
3 420 17. Garbin C, Rovida T, Costa AA, Garbin A. Perceptions and attitudes of public health  
4  
5 421 service dentists in the face of family violence in 24 municipalities in the state of São  
6  
7 422 Paulo, Brazil, 2013-2014. *Epidemiol Serv Saude*. 2016;25(1):1-10.  
8  
9 423 18. Manea S, Favero GA, Stellini E, Romoli L, Mazzucato M, Facchin P. Dentists'  
10  
11 424 perceptions, attitudes, knowledge, and experience about child abuse and neglect in  
12  
13 425 northeast Italy. *J Clin Pediatr Dent*. 2007;32(1):19-25.  
14  
15 426 19. El Sarraf MC, Marego G, Correr GM, Pizzatto E, Losso EM. Physical child abuse:  
16  
17 427 perception, diagnosis, and management by Southern Brazilian pediatric dentists.  
18  
19 428 *Pediatr Dent*. 2012; 34(4):e72-76.  
20  
21 429 20. Azevedo MS, Goettems ML, Brito A, Possebon AP, Domingues J, Demarco FF, et al.  
22  
23 430 Child maltreatment: a survey of dentists in southern Brazil. *Braz Oral Res*. 2012;  
24  
25 431 26(1):5-11.  
26  
27 432 21. Ben Natan M, Khater M, Ighbariyea R, Herbet H. Readiness of nursing students to  
28  
29 433 screen women for domestic violence. *Nurse Educ Today*. 2016;44:98-102.  
30  
31 434 22. Adair SM, Yasrebi S, Wray IA, Hanes CM, Sams DR, Russell CM. Demographic,  
32  
33 435 educational, and experiential factors associated with dentists' decisions to report  
34  
35 436 hypothetical cases of child maltreatment. *Pediatr Dent*. 1997; 19(8):466-469.  
36  
37 437 23. Katner DR, Brown CE. Mandatory reporting of oral injuries indicating possible child  
38  
39 438 abuse. *J Am Dent Assoc*. 2012; 143(10):1087-1092.  
40  
41 439 24. Skelton J, Herren C, Cunningham LL Jr, West KP. Knowledge, attitudes, practices,  
42  
43 440 and training needs of Kentucky dentists regarding violence against women. *Gen Dent*.  
44  
45 441 2007; 55(6):581-588.  
46  
47 442 25. Thomas JE, Straffon L, Inglehart MR. Knowledge and professional experiences  
48  
49 443 concerning child abuse: an analysis of provider and student responses. *Pediatr Dent*.  
50  
51 444 2006; 28(5):438-444.  
52  
53  
54  
55  
56  
57  
58  
59  
60

- 1  
2  
3 445 26. Lazenbatt A, Freeman R. Recognizing and reporting child physical abuse: a survey of  
4  
5 446 primary healthcare professionals. *J Adv Nurs*. 2006;56(3):227-236.  
6  
7 447 27. AlAlyani W, Alshouibi E. Dentists' awareness and action towards domestic violence  
8  
9 448 patients. A cross-sectional study among dentists in Western Saudi Arabia. *Saudi Med*  
10  
11 449 *J*. 2017;38(1):82-88.  
12  
13 450 28. Malpani S, Arora J, Diwaker G, Kaleka PK, Parey A, Bontala P. Child abuse and  
14  
15 451 neglect: Do we know enough? A cross-sectional study of knowledge, attitude, and  
16  
17 452 behavior of dentists regarding child abuse and neglect in Pune, India. *J Contemp Dent*  
18  
19 453 *Pract*. 2017;18(2):162-169.  
20  
21  
22 454 29. Laud A, Gizani S, Maragkou S, Welbury R, Papagiannoulis L. Child protection  
23  
24 455 training, experience, and personal views of dentists in the prefecture of Attica, Greece.  
25  
26 456 *Int J Paediatr Dent*. 2013;23(1):64-71.  
27  
28 457 30. Mythri H, Kashinath KR, Raju AS, Suresh K V, Bharateesh J V. Enhancing the dental  
29  
30 458 professional's responsiveness towards domestic violence; A cross-sectional study. *J*  
31  
32 459 *Clin Diagnostic Res*. 2015;9(6):ZC51-ZC53.  
33  
34  
35 460 31. Feng J-Y, Levine M. Factors associated with nurses' intention to report child abuse: A  
36  
37 461 national survey of Taiwanese nurses. *Child Abuse Negl*. 2005;29(7):783-795.  
38  
39 462 32. Usta J, Feder G, Antoun J. Attitudes towards domestic violence in Lebanon: a  
40  
41 463 qualitative study of primary care practitioners. *Br J Gen Pract*. 2014;64(623):e313-  
42  
43 464 e320.  
44  
45 465 33. Love C, Gerbert B, Caspers N, Bronstone A, Perry D, Bird W. Dentists' attitudes and  
46  
47 466 behaviours regarding domestic violence. The need for an effective response. *J Am*  
48  
49 467 *Dent Assoc*. 2001; 132(1):85-93.  
50  
51  
52 468 34. Mascarenhas AK, Deshmukh A, Scott T. New England, USA dental professionals'  
53  
54 469 attitudes and behaviours regarding domestic violence. *Br Dent J*. 2009; 206(3): E5.  
55  
56  
57  
58  
59  
60

- 1  
2  
3 470 35. Rolim ACA, Moreira GAR, Gondim SMM, Paz S da S, Vieira LJE de S. Factors  
4  
5 471 associated with reporting of abuse against children and adolescents by nurses within  
6  
7 472 Primary Health Care. *Rev Lat Am Enfermagem*. 2014;22(6):1048-1055.  
8  
9 473 36. Ben Natan M, Ben Ari G, Bader T, Hallak M. Universal screening for domestic  
10  
11 474 violence in a department of obstetrics and gynaecology: a patient and carer  
12  
13 475 perspective. *Int Nurs Rev*. 2012;59(1):108-114.  
14  
15 476 37. Ben Natan M, Faour C, Naamhah S, Grinberg K, Klein-Kremer A. Factors affecting  
16  
17 477 medical and nursing staff reporting of child abuse. *Int Nurs Rev*. 2012;59(3):331-337.  
18  
19 478 38. Feng J-Y, Wu Y-WB. Nurses' intention to report child abuse in Taiwan: A test of the  
20  
21 479 theory of planned behavior. *Res Nurs Health*. 2005;28(4):337-347.  
22  
23 480 39. The World Bank. Data for Arab World. Population. 2017. Available from:  
24  
25 481 <http://data.worldbank.org/?locations=1A-DZ>. Accessed June 10, 2017.  
26  
27  
28  
29 482



1  
2  
3 **483 Authors' contribution**

- 4  
5 484 • Maha El Tantawi, Maha Abdelsalam and Balgis Gaffar developed the study idea and questionnaire.  
6  
7 485 • Maha El Tantawi developed the study methods.  
8  
9 486 • Arheiam Arheiam, Wafaa AbdelAziz, Ola B. Al-Batayneh, Mansur Alhoti, Sadeq Al-Maweri, Mai A.  
10 487 Dama, Mounir Zaghez, Khalid Saddiq Hassan, Mona Al-Sane, Fatma Abdelgawad, Thiyezen Abdullah  
11 488 Aldhelai, Omar Abd El Sadek El Meligy, Jehan AlHumaid and Fahad Al-Harbi collected data.  
12  
13  
14 489 • Maha El Tantawi, Arheiam Arheiam and Wael Sabbah analyzed and interpreted the results.  
15  
16 490 • Maha El Tantawi, Arheiam Arheiam, Wael Sabbah, Arwa I. Owais, Omar Abd El Sadek El Meligy,  
17 491 Sadeq Al-Maweri and Wafaa AbdelAziz drafted the manuscripts.  
18  
19 492 • All authors read and approved the final manuscript.  
20  
21  
22  
23  
24  
25  
26  
27  
28  
29  
30  
31  
32  
33  
34  
35  
36  
37  
38  
39  
40  
41  
42  
43  
44  
45  
46  
47  
48  
49  
50  
51  
52  
53  
54  
55  
56  
57  
58  
59  
60

1  
2  
3 493 **Figure legends**

4  
5 494 Figure 1: Negative perception of mandated reporting, mean (SD)= 5.3 (2.1), range= 1-10

6  
7 495 Figure 2: Professional attitude toward reporting, mean (SD)= 7.5 (1.9), range= 1-10 (\*:

8  
9 496 negatively phrased statement)  
10  
11  
12  
13  
14  
15  
16  
17  
18  
19  
20  
21  
22  
23  
24  
25  
26  
27  
28  
29  
30  
31  
32  
33  
34  
35  
36  
37  
38  
39  
40  
41  
42  
43  
44  
45  
46  
47  
48  
49  
50  
51  
52  
53  
54  
55  
56  
57  
58  
59  
60

For peer review only

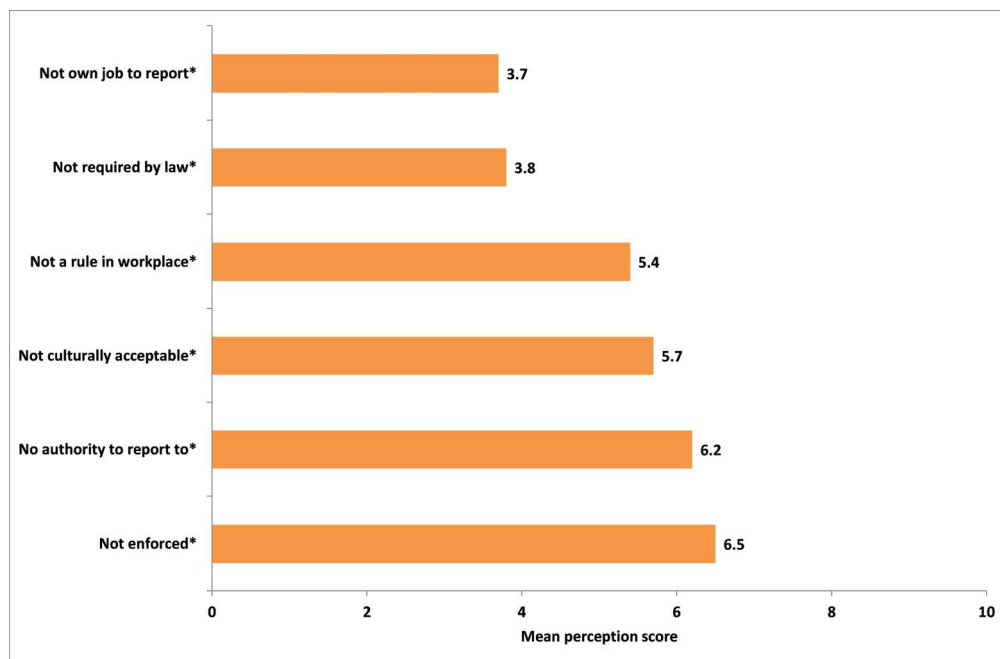

Figure 1: Negative perception of mandated reporting, mean (SD)= 5.3 (2.1), range= 1-10

168x110mm (300 x 300 DPI)

1  
2  
3  
4  
5  
6  
7  
8  
9  
10  
11  
12  
13  
14  
15  
16  
17  
18  
19  
20  
21  
22  
23  
24  
25  
26  
27  
28  
29  
30  
31  
32  
33  
34  
35  
36  
37  
38  
39  
40  
41  
42  
43  
44  
45  
46  
47  
48  
49  
50  
51  
52  
53  
54  
55  
56  
57  
58  
59  
60

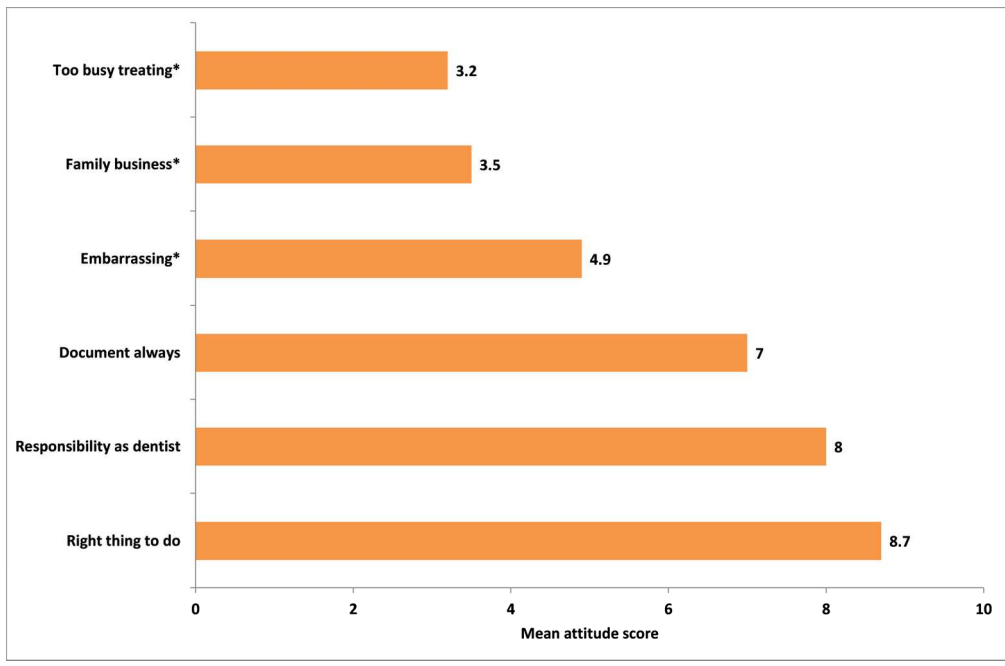

Figure 2: Professional attitude toward reporting, mean (SD)= 7.5 (1.9), range= 1-10 (\*: negatively phrased statement)

168x110mm (300 x 300 DPI)

**ABUSE MANAGEMENT IN DENTAL PRACTICE**

This study is conducted to investigate the role of dentists in abuse management. The questionnaire takes 10 minutes. Kindly answer all questions. All information you provide is confidential and will only be used for research purposes.

**I- Personal Information**

|                                            |                               |                                 |
|--------------------------------------------|-------------------------------|---------------------------------|
| 1. Gender                                  | <input type="checkbox"/> Male | <input type="checkbox"/> Female |
| 2. Age                                     | .....                         |                                 |
| 3. Has children                            | <input type="checkbox"/> Yes  | <input type="checkbox"/> No     |
| Nationality                                | .....                         |                                 |
| Country where you are currently practicing | .....                         |                                 |

**II- Professional background**

|                                                                   |                                               |                                                 |                                                      |
|-------------------------------------------------------------------|-----------------------------------------------|-------------------------------------------------|------------------------------------------------------|
| 4. Specialization                                                 | <input type="checkbox"/> General Practitioner | <input type="checkbox"/> Specialist/ Consultant |                                                      |
| 5. Type of practice                                               | <input type="checkbox"/> Private sector       | <input type="checkbox"/> Public sector          | <input type="checkbox"/> University clinic/ hospital |
| 6. Did you have any training in abuse management?                 | <input type="checkbox"/> Yes                  | <input type="checkbox"/> No                     |                                                      |
| 7. Do you think you can identify signs of abuse in your patients? | <input type="checkbox"/> Yes                  | <input type="checkbox"/> No                     |                                                      |

**III- Perception of abuse reporting in clinical practice**

How much, on a scale of **1** (not true at all) to **10** (very true), in your opinion is the following true about abuse reporting where you practice?

|                                                              |  |
|--------------------------------------------------------------|--|
| 8. Reporting abuse is not required by law.                   |  |
| 9. Reporting abuse is not enforced.                          |  |
| 10. Reporting abuse is not a rule of the place where I work. |  |
| 11. There is no specific authority to report to.             |  |
| 12. It is not my job to report abuse.                        |  |
| 13. Reporting abuse is not culturally accepted               |  |

**IV- Attitudes towards abuse reporting**

Select the response that represents your attitude on a scale from **1** (completely disagree) to **10** (completely agree) for each of the following

|                                                                                          |  |
|------------------------------------------------------------------------------------------|--|
| 14. Reporting abuse is the right thing to do                                             |  |
| 15. It is my responsibility as a dentist to report abuse                                 |  |
| 16. I am too busy treating patients to report abuse                                      |  |
| 17. I would document abuse manifestations even if not relevant to treatment              |  |
| 18. If abuse is suspected within a family, it is their business; no one should interfere |  |
| 19. It is embarrassing to interfere with others to check about suspected abuse           |  |

**20. Which of the following would be your first choice to report abuse to?**

|                                                         |                                                                               |                                             |
|---------------------------------------------------------|-------------------------------------------------------------------------------|---------------------------------------------|
| <input type="checkbox"/> Police                         | <input type="checkbox"/> Social Service Agencies / Ministry of Social Affairs | <input type="checkbox"/> Ministry of Health |
| <input type="checkbox"/> Non-governmental Organizations | <input type="checkbox"/> Others (specify.....)                                | <input type="checkbox"/> I do not know      |

**STROBE 2007 (v4) Statement—Checklist of items that should be included in reports of *cross-sectional studies***

| Section/Topic             | Item # | Recommendation                                                                                                                                                                       | Reported on page # |
|---------------------------|--------|--------------------------------------------------------------------------------------------------------------------------------------------------------------------------------------|--------------------|
| Title and abstract        | 1      | (a) Indicate the study’s design with a commonly used term in the title or the abstract                                                                                               | 1                  |
|                           |        | (b) Provide in the abstract an informative and balanced summary of what was done and what was found                                                                                  | 2                  |
| <b>Introduction</b>       |        |                                                                                                                                                                                      |                    |
| Background/rationale      | 2      | Explain the scientific background and rationale for the investigation being reported                                                                                                 | 5& 6               |
| Objectives                | 3      | State specific objectives, including any prespecified hypotheses                                                                                                                     | 6                  |
| <b>Methods</b>            |        |                                                                                                                                                                                      |                    |
| Study design              | 4      | Present key elements of study design early in the paper                                                                                                                              | 6                  |
| Setting                   | 5      | Describe the setting, locations, and relevant dates, including periods of recruitment, exposure, follow-up, and data collection                                                      | 6                  |
| Participants              | 6      | (a) Give the eligibility criteria, and the sources and methods of selection of participants                                                                                          | 7                  |
| Variables                 | 7      | Clearly define all outcomes, exposures, predictors, potential confounders, and effect modifiers. Give diagnostic criteria, if applicable                                             | 7& 8               |
| Data sources/ measurement | 8*     | For each variable of interest, give sources of data and details of methods of assessment (measurement). Describe comparability of assessment methods if there is more than one group | 7& 8               |
| Bias                      | 9      | Describe any efforts to address potential sources of bias                                                                                                                            | -                  |
| Study size                | 10     | Explain how the study size was arrived at                                                                                                                                            | 6                  |
| Quantitative variables    | 11     | Explain how quantitative variables were handled in the analyses. If applicable, describe which groupings were chosen and why                                                         | 8                  |
| Statistical methods       | 12     | (a) Describe all statistical methods, including those used to control for confounding                                                                                                | 8                  |
|                           |        | (b) Describe any methods used to examine subgroups and interactions                                                                                                                  | -                  |
|                           |        | (c) Explain how missing data were addressed                                                                                                                                          | -                  |
|                           |        | (d) If applicable, describe analytical methods taking account of sampling strategy                                                                                                   | -                  |
|                           |        | (e) Describe any sensitivity analyses                                                                                                                                                | -                  |
| <b>Results</b>            |        |                                                                                                                                                                                      |                    |
| Participants              | 13*    | (a) Report numbers of individuals at each stage of study—eg numbers potentially eligible, examined for eligibility, confirmed                                                        | 9                  |

1  
2  
3  
4  
5  
6  
7  
8  
9  
10  
11  
12  
13  
14  
15  
16  
17  
18  
19  
20  
21  
22  
23  
24  
25  
26  
27  
28  
29  
30  
31  
32  
33  
34  
35  
36  
37  
38  
39  
40  
41  
42  
43  
44  
45  
46  
47

|                          |     |                                                                                                                                                                                                              |        |
|--------------------------|-----|--------------------------------------------------------------------------------------------------------------------------------------------------------------------------------------------------------------|--------|
|                          |     | eligible, included in the study, completing follow-up, and analysed                                                                                                                                          |        |
|                          |     | (b) Give reasons for non-participation at each stage                                                                                                                                                         | -      |
|                          |     | (c) Consider use of a flow diagram                                                                                                                                                                           | -      |
| Descriptive data         | 14* | (a) Give characteristics of study participants (eg demographic, clinical, social) and information on exposures and potential confounders                                                                     | 9& 10  |
|                          |     | (b) Indicate number of participants with missing data for each variable of interest                                                                                                                          | -      |
| Outcome data             | 15* | Report numbers of outcome events or summary measures                                                                                                                                                         | 11&12  |
| Main results             | 16  | (a) Give unadjusted estimates and, if applicable, confounder-adjusted estimates and their precision (eg, 95% confidence interval). Make clear which confounders were adjusted for and why they were included | 12& 13 |
|                          |     | (b) Report category boundaries when continuous variables were categorized                                                                                                                                    | -      |
|                          |     | (c) If relevant, consider translating estimates of relative risk into absolute risk for a meaningful time period                                                                                             | -      |
| Other analyses           | 17  | Report other analyses done—eg analyses of subgroups and interactions, and sensitivity analyses                                                                                                               | -      |
| <b>Discussion</b>        |     |                                                                                                                                                                                                              |        |
| Key results              | 18  | Summarise key results with reference to study objectives                                                                                                                                                     | 14     |
| Limitations              | 19  | Discuss limitations of the study, taking into account sources of potential bias or imprecision. Discuss both direction and magnitude of any potential bias                                                   | 17     |
| Interpretation           | 20  | Give a cautious overall interpretation of results considering objectives, limitations, multiplicity of analyses, results from similar studies, and other relevant evidence                                   | 14-17  |
| Generalisability         | 21  | Discuss the generalisability (external validity) of the study results                                                                                                                                        | 17     |
| <b>Other information</b> |     |                                                                                                                                                                                                              |        |
| Funding                  | 22  | Give the source of funding and the role of the funders for the present study and, if applicable, for the original study on which the present article is based                                                | 4      |

\*Give information separately for cases and controls in case-control studies and, if applicable, for exposed and unexposed groups in cohort and cross-sectional studies.

**Note:** An Explanation and Elaboration article discusses each checklist item and gives methodological background and published examples of transparent reporting. The STROBE checklist is best used in conjunction with this article (freely available on the Web sites of PLoS Medicine at <http://www.plosmedicine.org/>, Annals of Internal Medicine at <http://www.annals.org/>, and Epidemiology at <http://www.epidem.com/>). Information on the STROBE Initiative is available at [www.strobe-statement.org](http://www.strobe-statement.org).
