# Supplementary material for: Dentists’ intention to report suspected violence: a cross-sectional study in eight Arab countries
Source: PubMed Central journal article supplement — BMJ Open. 2018 Mar 30;8(3):e019786. doi: 10.1136/bmjopen-2017-019786 (PMC5884375; doi:10.1136/bmjopen-2017-019786), 2018-03-30
Supplement: bmjopen-2017-019786supp001.pdf [file bmjopen-2017-019786supp001.pdf]

## ABUSE MANAGEMENT IN DENTAL PRACTICE

This study is conducted to investigate the role of dentists in abuse management. The questionnaire takes 10 minutes. Kindly answer all questions. All information you provide is confidential and will only be used for research purposes.

### I- Personal Information

|                                            |                               |                                 |
|--------------------------------------------|-------------------------------|---------------------------------|
| 1. Gender                                  | <input type="checkbox"/> Male | <input type="checkbox"/> Female |
| 2. Age                                     | .....                         |                                 |
| 3. Has children                            | <input type="checkbox"/> Yes  | <input type="checkbox"/> No     |
| Nationality                                | .....                         |                                 |
| Country where you are currently practicing | .....                         |                                 |

### II- Professional background

|                                                                   |                                               |                                                 |                                                      |
|-------------------------------------------------------------------|-----------------------------------------------|-------------------------------------------------|------------------------------------------------------|
| 4. Specialization                                                 | <input type="checkbox"/> General Practitioner | <input type="checkbox"/> Specialist/ Consultant |                                                      |
| 5. Type of practice                                               | <input type="checkbox"/> Private sector       | <input type="checkbox"/> Public sector          | <input type="checkbox"/> University clinic/ hospital |
| 6. Did you have any training in abuse management?                 | <input type="checkbox"/> Yes                  | <input type="checkbox"/> No                     |                                                      |
| 7. Do you think you can identify signs of abuse in your patients? | <input type="checkbox"/> Yes                  | <input type="checkbox"/> No                     |                                                      |

### III- Perception of abuse reporting in clinical practice

How much, on a scale of **1** (not true at all) to **10** (very true), in your opinion is the following true about abuse reporting where you practice?

|                                                              |  |
|--------------------------------------------------------------|--|
| 8. Reporting abuse is not required by law.                   |  |
| 9. Reporting abuse is not enforced.                          |  |
| 10. Reporting abuse is not a rule of the place where I work. |  |
| 11. There is no specific authority to report to.             |  |
| 12. It is not my job to report abuse.                        |  |
| 13. Reporting abuse is not culturally accepted               |  |

### IV- Attitudes towards abuse reporting

Select the response that represents your attitude on a scale from **1** (completely disagree) to **10** (completely agree) for each of the following

|                                                                                          |  |
|------------------------------------------------------------------------------------------|--|
| 14. Reporting abuse is the right thing to do                                             |  |
| 15. It is my responsibility as a dentist to report abuse                                 |  |
| 16. I am too busy treating patients to report abuse                                      |  |
| 17. I would document abuse manifestations even if not relevant to treatment              |  |
| 18. If abuse is suspected within a family, it is their business; no one should interfere |  |
| 19. It is embarrassing to interfere with others to check about suspected abuse           |  |

### 20. Which of the following would be your first choice to report abuse to?

|                                                         |                                                                               |                                             |
|---------------------------------------------------------|-------------------------------------------------------------------------------|---------------------------------------------|
| <input type="checkbox"/> Police                         | <input type="checkbox"/> Social Service Agencies / Ministry of Social Affairs | <input type="checkbox"/> Ministry of Health |
| <input type="checkbox"/> Non-governmental Organizations | <input type="checkbox"/> Others (specify.....)                                | <input type="checkbox"/> I do not know      |
